# Supplementary material for: Aorta smooth muscle-on-a-chip reveals impaired mitochondrial dynamics as a therapeutic target for aortic aneurysm in bicuspid aortic valve disease
Source: eLife journal article supplement (doi:10.7554/elife.69310), 2021-09-06

## non-diseased patient #1

MFN1

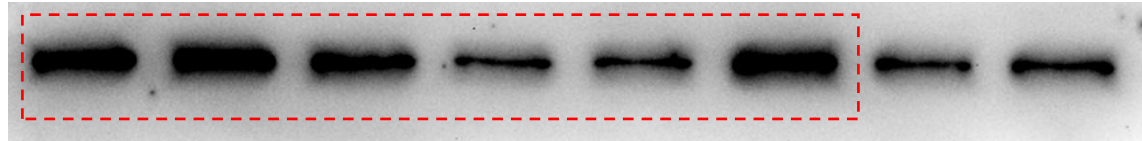

MFN2

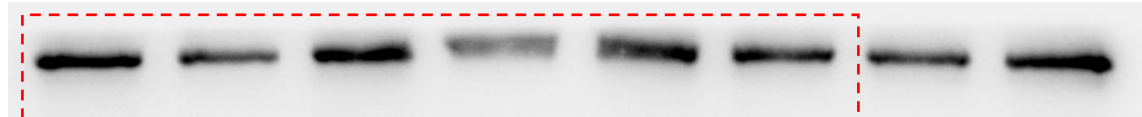

CNN1

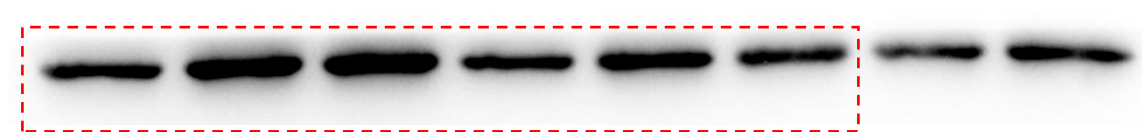

SM22

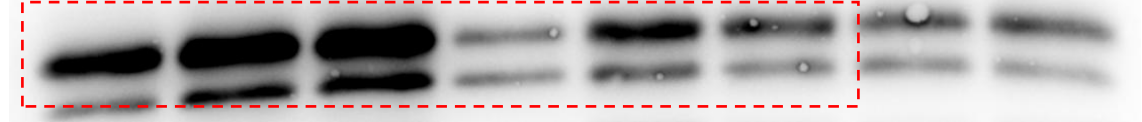

$\beta$ -actin

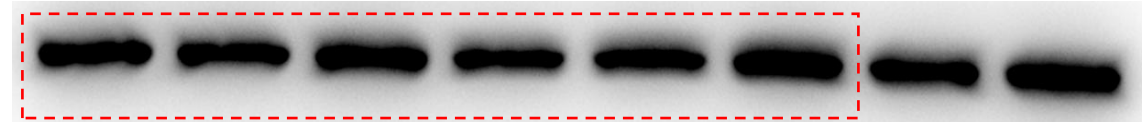

DRP1

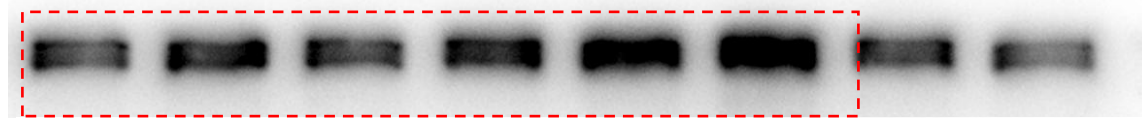

MFF

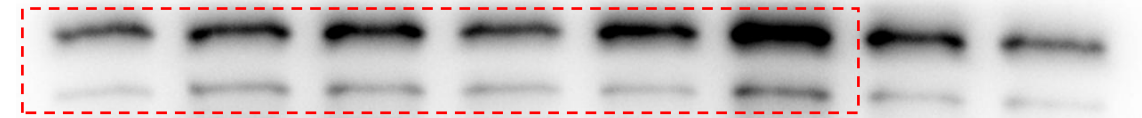

$\beta$ -actin

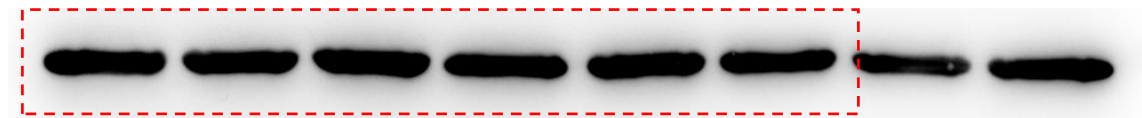

non-diseased patient #2

MFN1

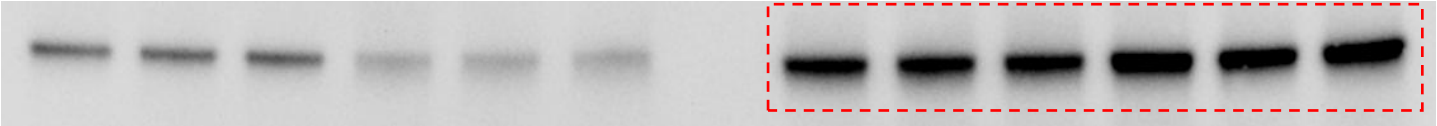

MFN2

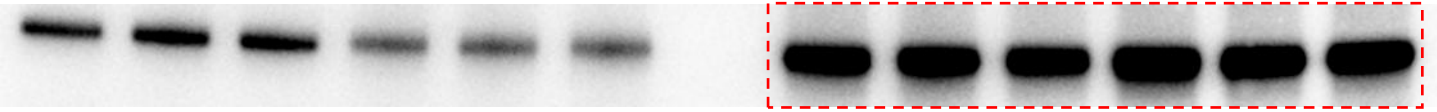

CNN1

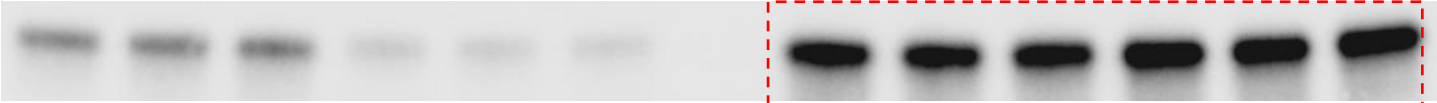

SM22

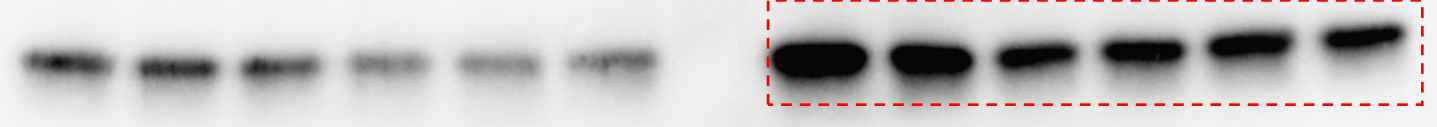

$\beta$ -actin

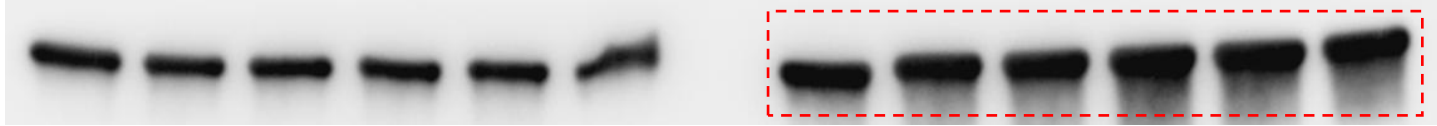

MFF

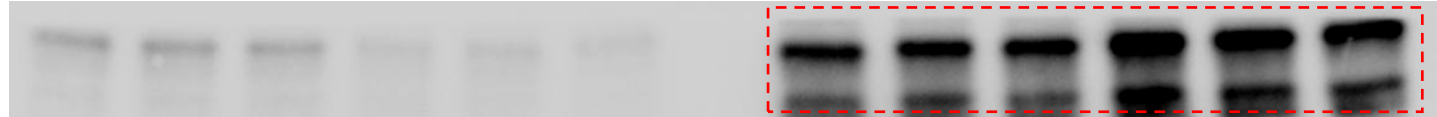

DRP1

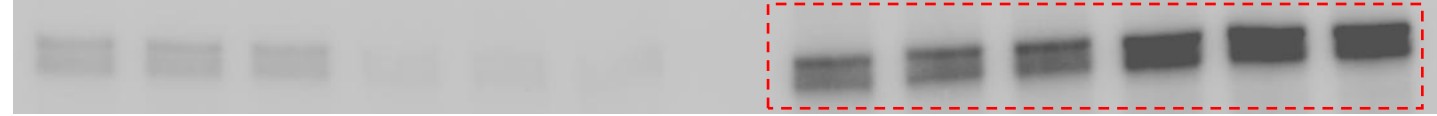

$\beta$ -actin

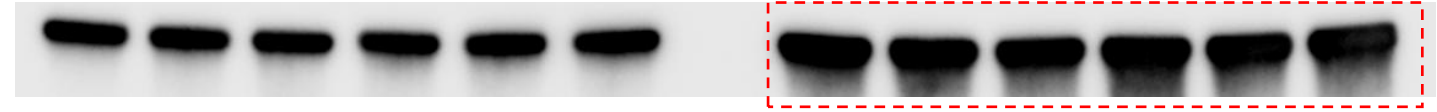

### non-diseased patient #3

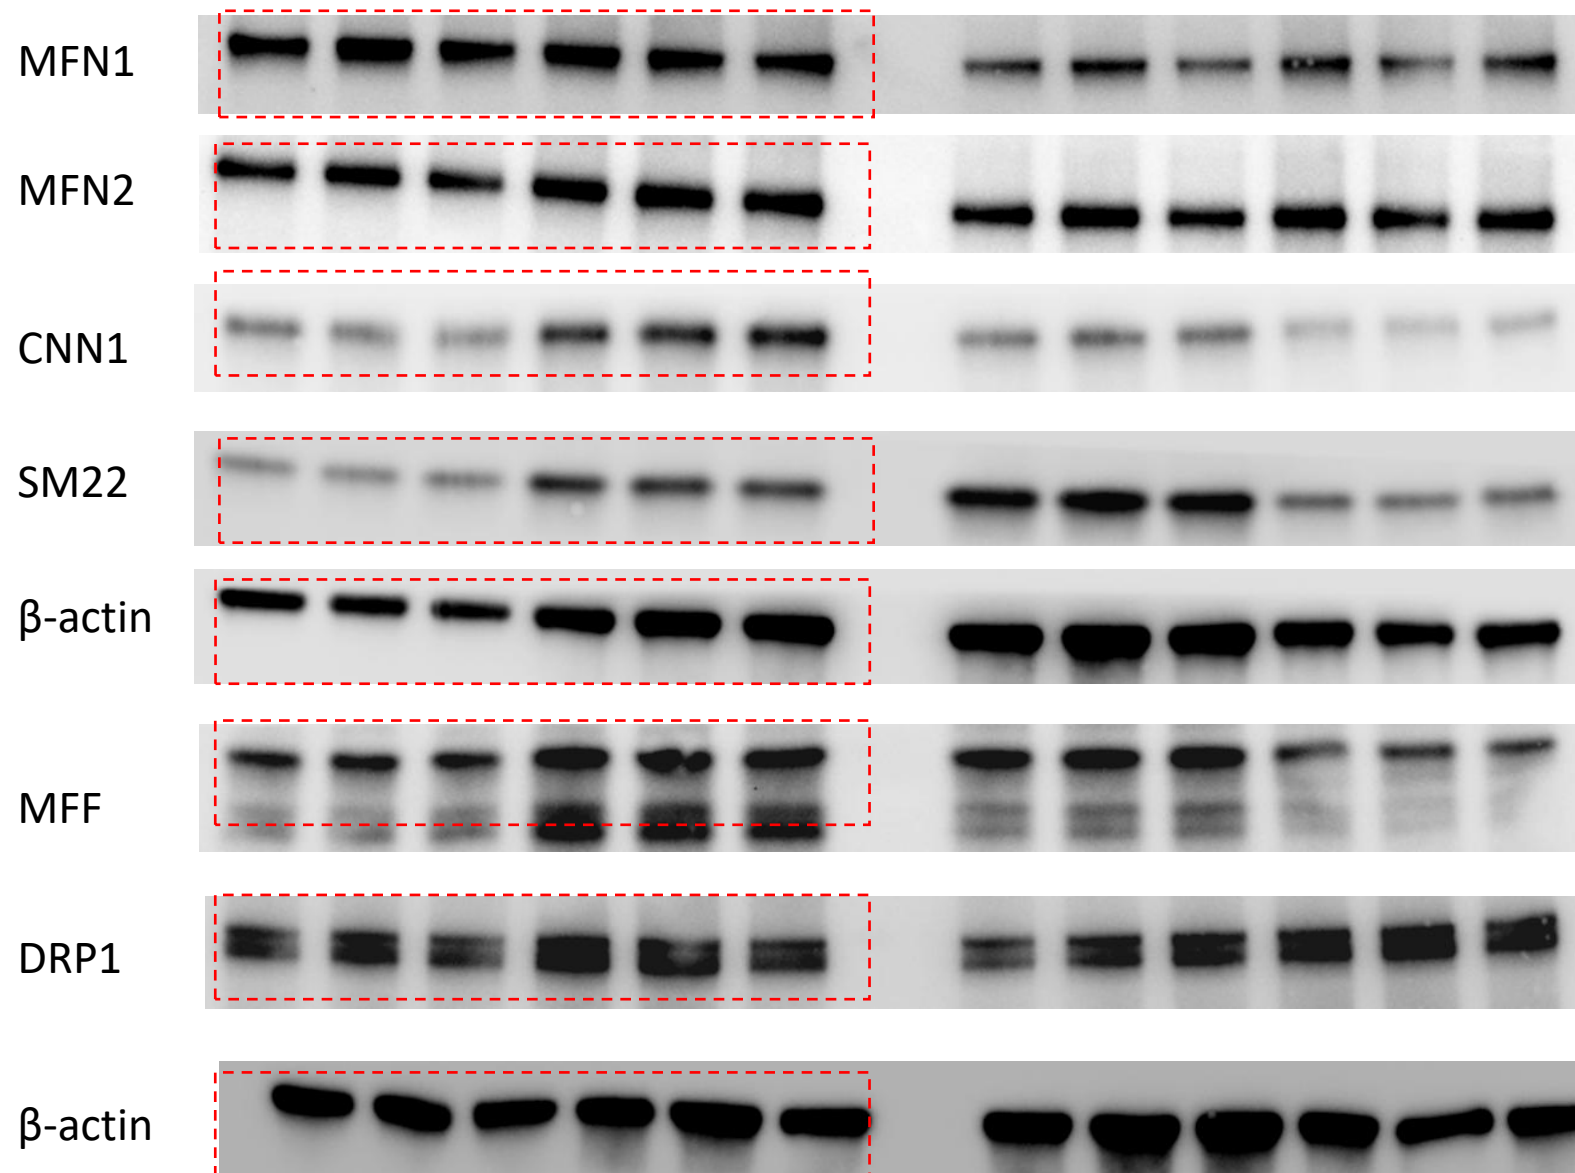

## BAV-TAA patient #1

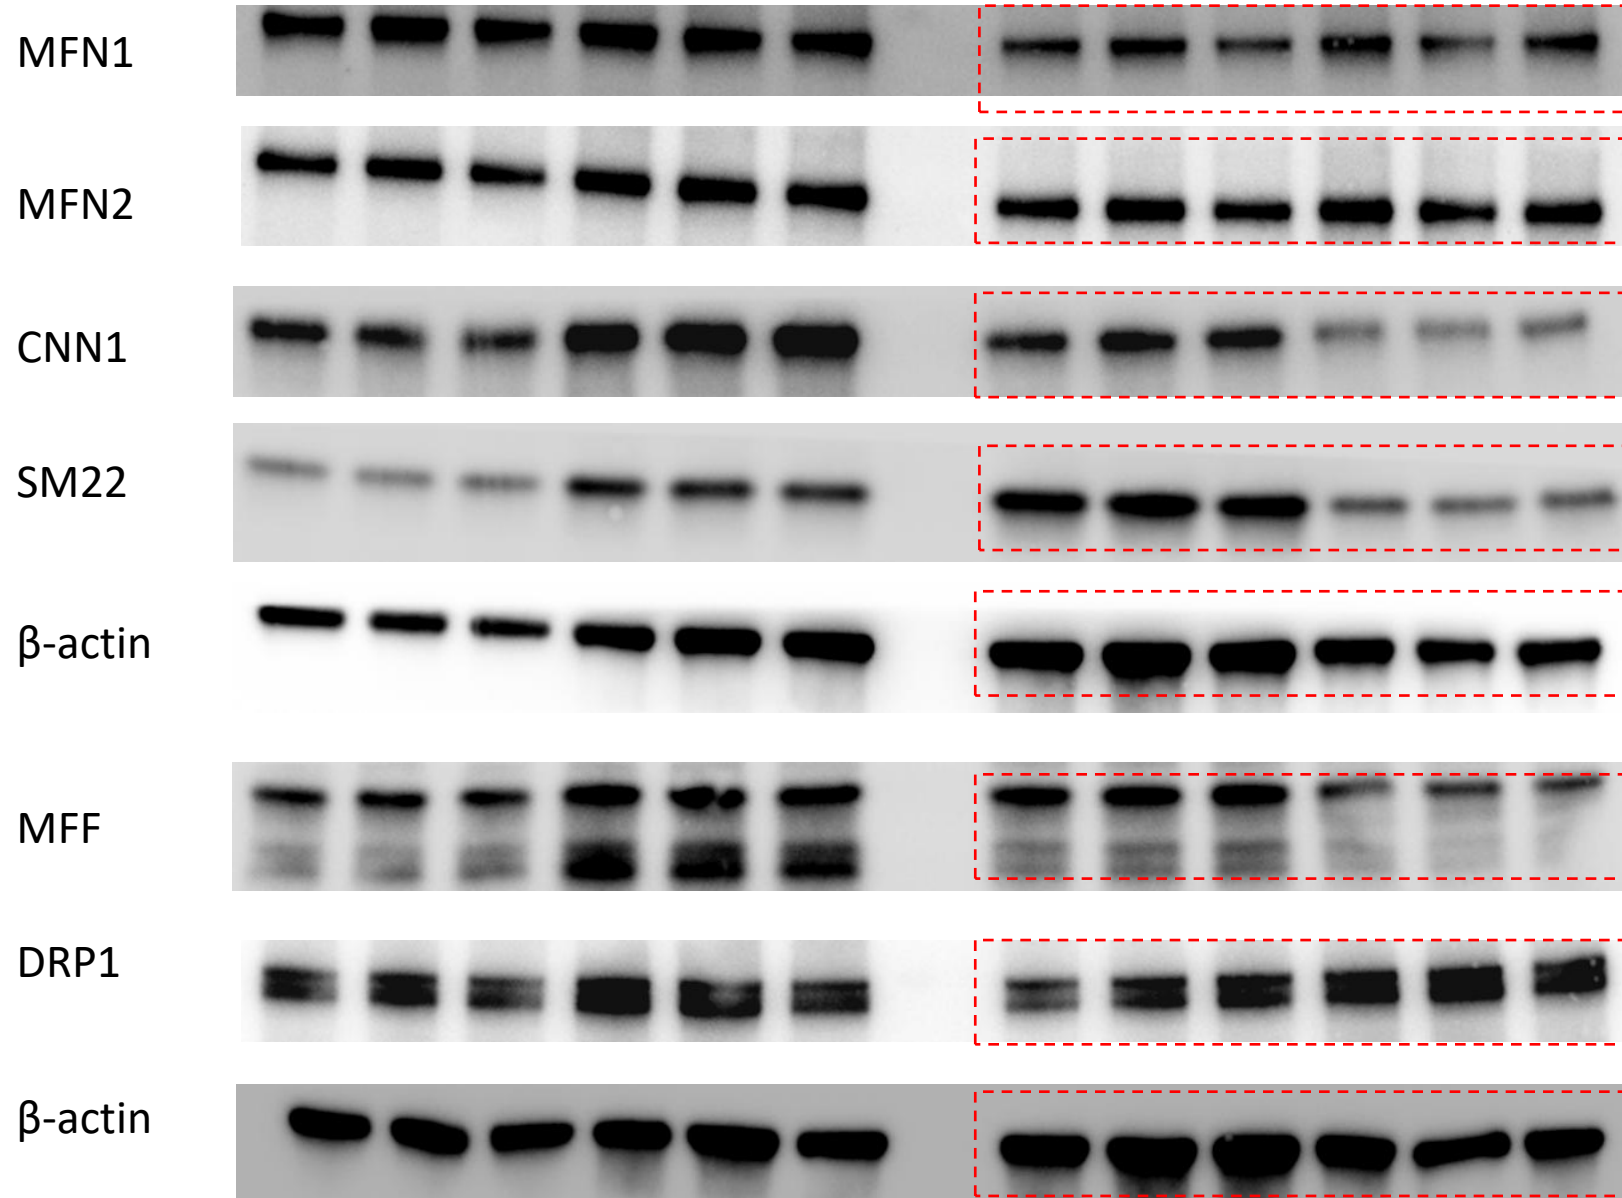

BAV-TAA patient # 2

MFN1

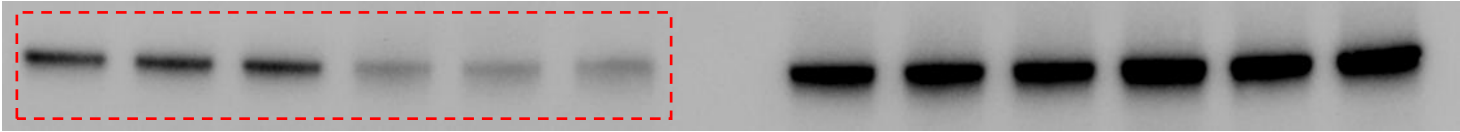

MFN2

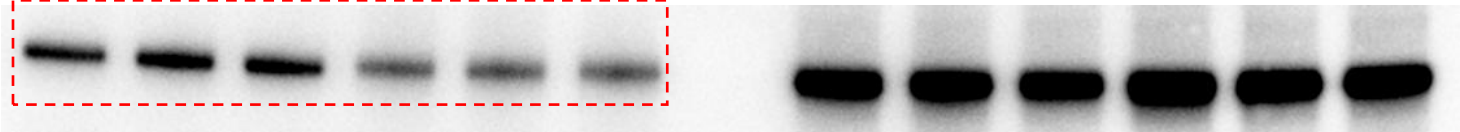

CNN1

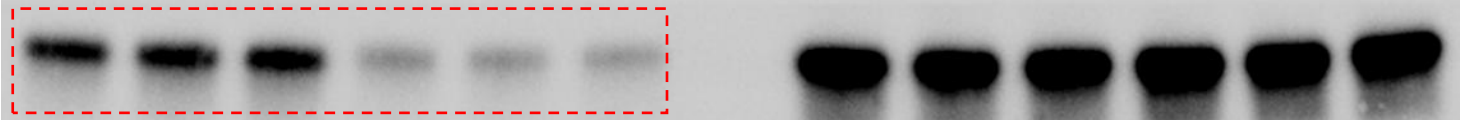

SM22

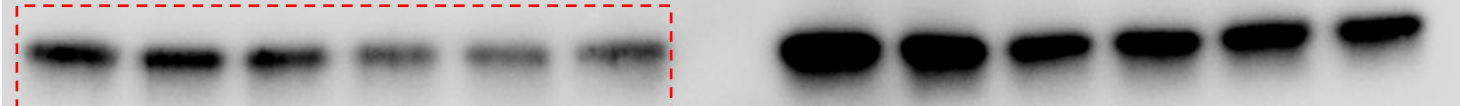

$\beta$ -actin

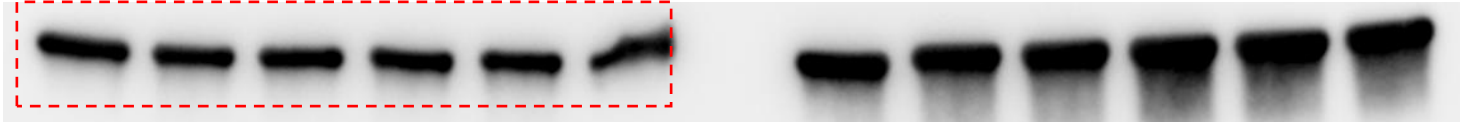

MFF

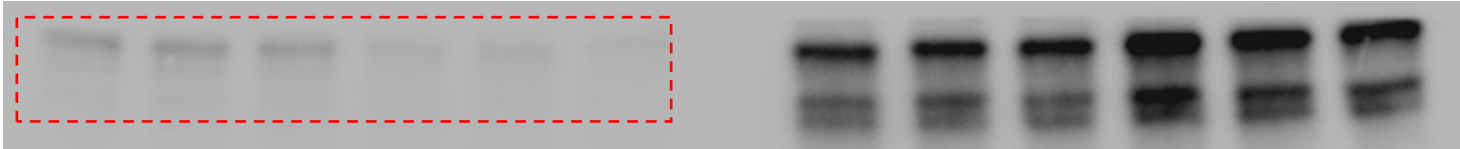

DRP1

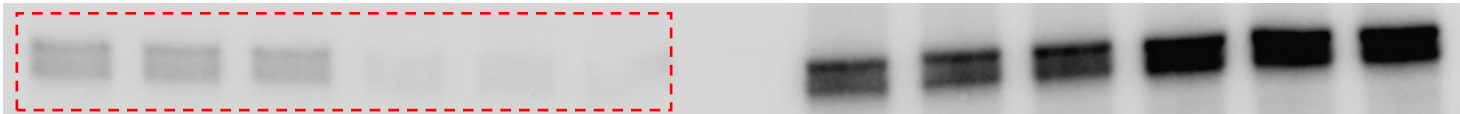

$\beta$ -actin

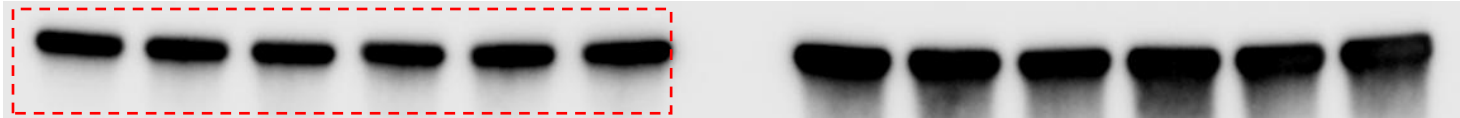

### BAV-TAA patient # 3

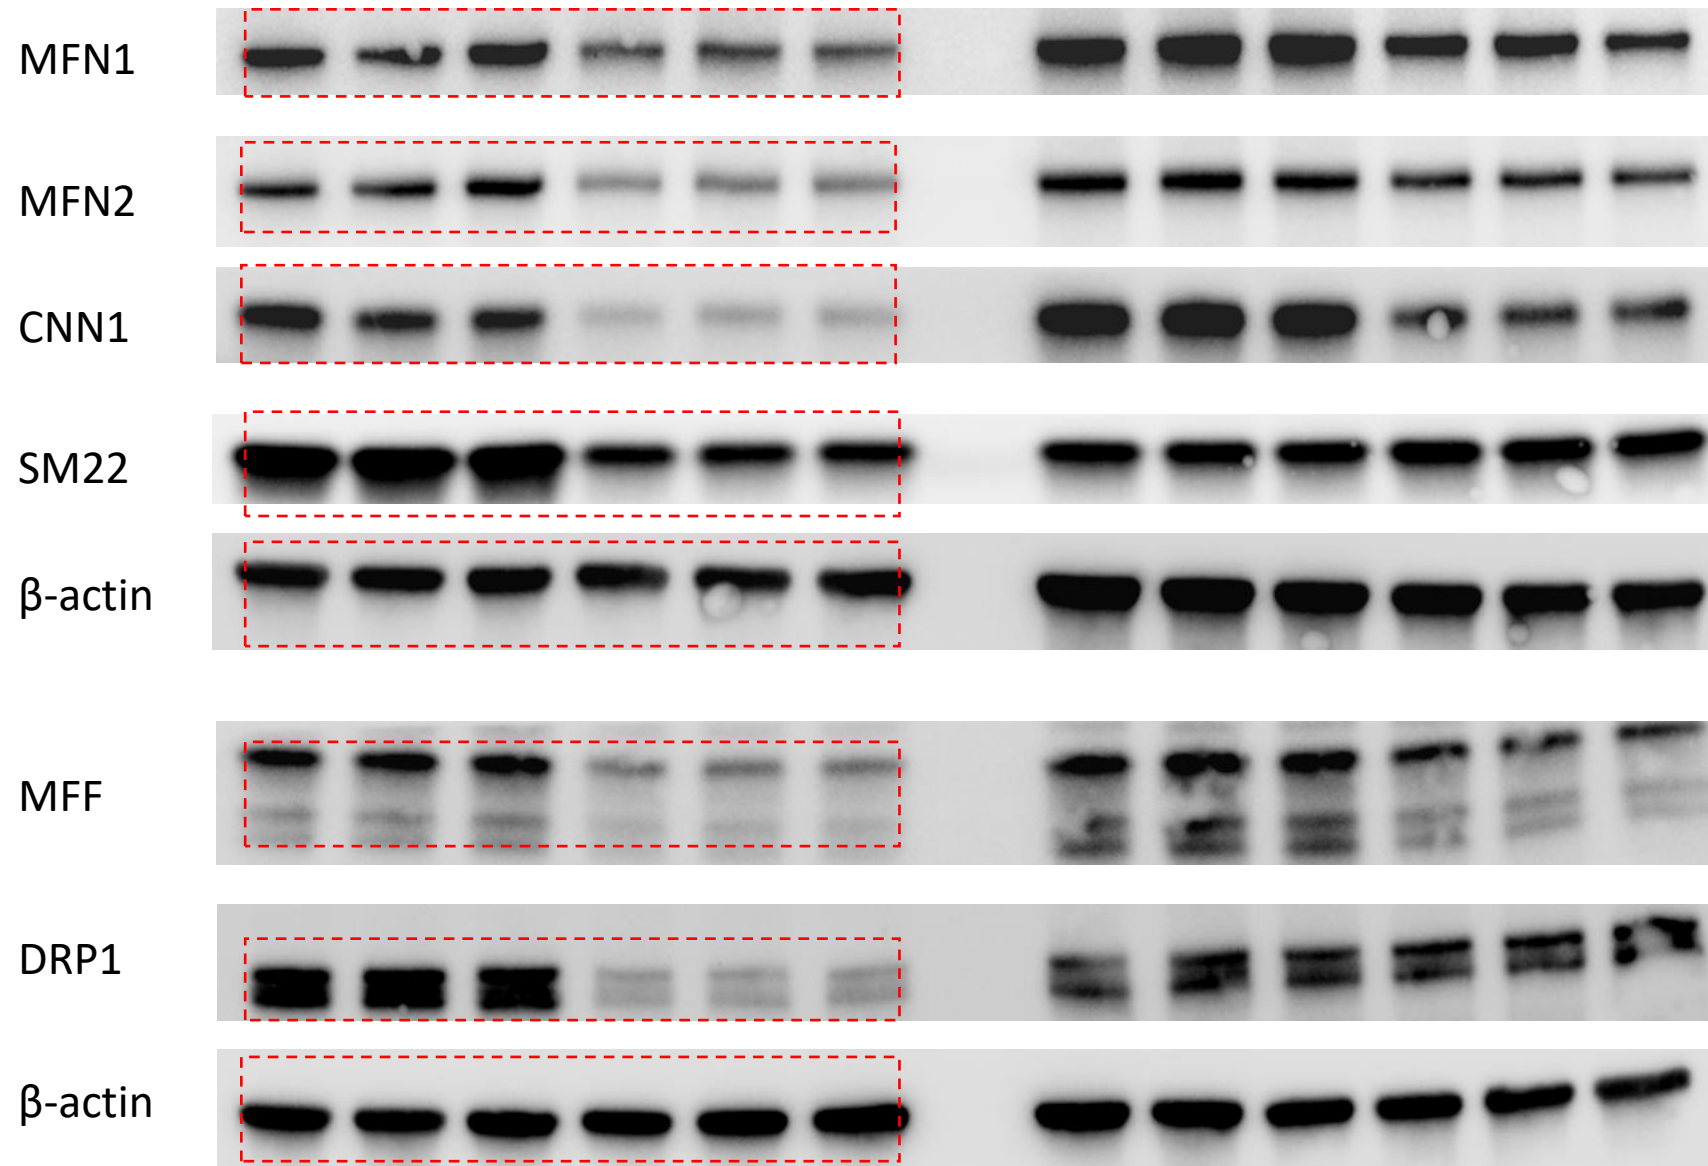

Supplement: supp [file elife-69310-supp-v1.zip]
