# Supplementary material for: Aorta smooth muscle-on-a-chip reveals impaired mitochondrial dynamics as a therapeutic target for aortic aneurysm in bicuspid aortic valve disease
Source: eLife journal article supplement (doi:10.7554/elife.69310), 2021-09-06
Supplement: supp [file data.xlsx]

## Sheet: Sheet1
	B-ACTIN-1	SM22		CNN1		MFN-1		MFN-2				B-ACCTIN-2	DRP1		MFF
strain	29340.3	28151.7	0.959488	24942.5	0.850107	24224.1	0.825625	11228.3	0.38269			23528.1	43568.5	1.85177	24210	1.02898
strain	25912.6	18110.6	0.698913	19926.7	0.768996	16853.4	0.650393	6726.05	0.259567			25066.3	39632	1.58109	23556.2	0.939753
strain	27801.8	15665.8	0.563481	18403.7	0.661959	15825.8	0.569235	11281.9	0.405797			28879.1	39437.5	1.3656	27539.3	0.953607
strain+MID1	23493.3	14734.5	0.627178	19095.5	0.812805	18087.5	0.769898	12295.8	0.523376			27113.2	27952	1.03094	15876.3	0.585557
strain+MID1	22497.6	15338.9	0.681804	21642.5	0.961994	20318.1	0.903123	14125.9	0.627886			25404	34522.4	1.35893	16320.4	0.642435
strain+MID1	22814.8	16045.8	0.703305	20637.6	0.904569	16449.6	0.721005	11595.7	0.508254			23195.6	34261.7	1.47707	13566.6	0.584878
strain+Lef	21108	12879.1	0.610153	21235.5	1.00604	6567.27	0.311127	13186.4	0.62471			23523.1	38167.4	1.62255	10328.7	0.439088
strain+Lef	22598.5	16852	0.745712	18644.7	0.825042	5472.61	0.242166	12246.4	0.541912			19834.7	30647.4	1.54514	7673.1	0.386853
strain+Lef	21010.1	13033.6	0.620352	16507.6	0.785701	7337.85	0.349254	12632.6	0.601263			18175.7	26505.9	1.45831	6009.07	0.33061
strain+Ter	22571.3	27439.3	1.21567	21042.3	0.932262	11371.7	0.503811	25866.9	1.14601			25602.6	32526.4	1.27043	10131.2	0.395712
strain+Ter	20824.9	29105.5	1.39763	25511.9	1.22507	15684.5	0.753164	16383	0.786706			20060.1	17217.9	0.858318	5950.68	0.296643
strain+Ter	17489.2	27336.4	1.56305	24877.3	1.42244	16851.3	0.963528	23663.8	1.35306			18684.6	9447.75	0.505643	2476.2	0.132526
