# Supplementary material for: Aorta smooth muscle-on-a-chip reveals impaired mitochondrial dynamics as a therapeutic target for aortic aneurysm in bicuspid aortic valve disease
Source: eLife journal article supplement (doi:10.7554/elife.69310), 2021-09-06
Supplement: supp [file data.xlsx]

## Sheet: Sheet1
	NOTCH1-KD	B-ACTIN-001	B-ACTIN-002	CNN1-001		DRP-1-002		MFF-002		MFN-2-001		MFN-1-004		SM22-002
2	strain	49916.8	28690.5	20065.6	0.699379	36301	1.26526	21760.6	0.758458	13502.7	0.470631	14644.8	0.510441	17902.8	0.623997
3	strain	48179.5	27313.4	25731.6	0.942085	23812.9	0.871838	22403	0.820218	12678.6	0.464188	11633.8	0.425935	18249.5	0.668152
4	strain	48284.2	27299.5	27290.5	0.99967	20227	0.740929	23587.9	0.864041	12981.4	0.475517	14928.3	0.546834	18328.7	0.671392
5	strain+MID1	47016.3	27504.5	30188.2	1.09757	21017.8	0.764158	22642	0.823212	20639.9	0.750418	21728.7	0.790005	22041.9	0.801393
6	strain+MID1	46325.2	27972.6	29212.3	1.04432	18190.5	0.650295	22494.9	0.804176	21613.7	0.772673	24496.3	0.875725	23857	0.85287
7	strain+MID1	45945.9	27028.9	28951.7	1.07114	14073.7	0.520691	22616.9	0.836767	22029	0.815016	22443.3	0.830345	24147.3	0.893388
8	strain+Lef	49861.2	28587.3	34311.9	1.20025	15484.1	0.541644	20932.3	0.732224	19307.6	0.675389	16367	0.572527	25633.1	0.89666
9	strain+Lef	47207.2	28757.5	35936.2	1.24963	16098.7	0.55981	19901.8	0.692055	18919.7	0.657907	17694.4	0.615296	25821.8	0.897916
10	strain+Lef	43456.8	27190	34145.6	1.25582	16668.1	0.613024	20249.5	0.744741	18759.7	0.689951	15834.2	0.582354	26589	0.977898
11	strain+Ter	35228.2	24815.2	27410.8	1.1046	12252.5	0.493751	23357.6	0.941263	18896.5	0.76149	16341.8	0.658539	20946.1	0.844083
12	strain+Ter	31751.5	26109.5	21709.8	0.83149	10709.8	0.410189	20480.6	0.784411	16882.9	0.64662	12202.9	0.467373	20271.4	0.776399
13	strain+Ter	28041.8	26655.3	20439.4	0.766803	10126.5	0.379906	14682.1	0.550813	18877.2	0.708196	11210.6	0.420577	22258.5	0.835047
