# Supplementary material for: Aorta smooth muscle-on-a-chip reveals impaired mitochondrial dynamics as a therapeutic target for aortic aneurysm in bicuspid aortic valve disease
Source: eLife journal article supplement (doi:10.7554/elife.69310), 2021-09-06
Supplement: supp [file data.xlsx]

## Sheet: Sheet1
		B-ACTIN-001-3	B-ACTIN-002-3	CNN1-003-3	DRP-1-002-3	MFF-002-3	MFN-1-003-1	MFN-2-001-1	SM22-003-3		b-actin
	strain	24049.6	26974.9	10860.8	28519.6	15407.9	16721.6	20888.9	3420.47		25512.3
	strain	24320.2	27911.8	18242.3	27652.5	16798.2	11150.2	19428.6	7160.51		26116
	strain	26782.8	28010.9	18271.5	27882.4	17297.7	13195.7	21655	7619.39		27396.9
	strain+MID1	28874.1	29246.8	23588.2	17768.7	11682.8	16171.1	23297.7	11201.1		29060.5
	strain+MID1	27806	27267.4	23999	21893.1	19435.3	23028.8	25860.7	12351.8		27536.7
	strain+MID1	29058.2	27282.6	23089.9	17253.9	13386.5	16584.3	22276.8	13656.5		28170.4
	strain+Lef	25959.4	23616.6	26890.1	14350.2	14625.4	16278	25516.9	16028.5		24788
	strain+Lef	26445.6	24307.2	25707.6	14444.5	18706	16546.4	25268	14900.1		25376.4
	strain+Lef	25783.6	25282.8	9861.82	12176.3	17499	14052.7	25420.1	14879.9		25533.2
	strain+Ter	24774.1	27870.5	20956.6	12957.7	19417.4	13032.6	24583.5	18873		26322.3
	strain+Ter	24811.9	27543.5	21253.7	11859	16205.1	18231.9	28534.8	17842.2		26177.7
	strain+Ter	25697	28516.8	22704.3	7209.68	9203.7	17814.6	30462.2	16739.9		27106.9
		CNN1-003-3	DRP-1-002-3	MFF-002-3	MFN-1-003-1	MFN-2-001-1	SM22-003-3
	strain	0.425711	1.11788	0.603941	0.655432	0.81878	0.134072
	strain	0.698511	1.05883	0.643215	0.426951	0.743936	0.274181
	strain	0.666918	1.01772	0.631373	0.481651	0.790418	0.278112
	strain+MID1	0.811693	0.611438	0.402015	0.556462	0.801698	0.385442
	strain+MID1	0.871529	0.795052	0.705795	0.836294	0.939135	0.448559
	strain+MID1	0.819651	0.612483	0.475199	0.588713	0.790789	0.484783
	strain+Lef	1.0848	0.578918	0.590018	0.656689	1.02941	0.646623
	strain+Lef	1.01305	0.569211	0.737141	0.652038	0.99573	0.587165
	strain+Lef	0.386236	0.476883	0.685342	0.55037	0.99557	0.582769
	strain+Ter	0.796152	0.492271	0.737678	0.495116	0.933944	0.716997
	strain+Ter	0.811901	0.45302	0.619041	0.696466	1.09004	0.681579
	strain+Ter	0.837583	0.265972	0.339533	0.657195	1.12378	0.617552
