# Supplementary material for: Aorta smooth muscle-on-a-chip reveals impaired mitochondrial dynamics as a therapeutic target for aortic aneurysm in bicuspid aortic valve disease
Source: eLife journal article supplement (doi:10.7554/elife.69310), 2021-09-06
Supplement: supp [file data.xlsx]

## Sheet: Sheet1
		B-ACTIN-001	CNN1-003	DRP-1-002	MFN-1-003	MFN-2-001	MFF-004	SM22-003
2	strain	23203.6	15392.7	15856.6	8737.56	15933.1	10387.7	9637.36
3	strain	23764.5	13029.5	13498.5	9215.97	13453	11207.5	13509.8
4	strain	27271	14964.5	14714.3	9355.97	14856.7	10515.3	14416.9
5	strain+MID1	25421.4	24593.2	18640.2	13111.8	14945.8	14564.9	17116.5
6	strain+MID1	25377.9	24464.3	23404.1	7758.02	14774.5	16594.7	17546.3
7	strain+MID1	26412.6	24214.5	23879.1	11547.8	16779.7	15759.1	20281.6
8	strain+Lef	26399.1	18245.9	20448.5	4064.18	18068.3	11857.5	20359.1
9	strain+Lef	25578.3	18772.8	19581.5	5323.54	17676.3	8817.65	19745.1
10	strain+Lef	24942.8	16222.4	18693.2	6479.2	16077.5	5428.22	15969.2
11	strain+Ter	21861.6	27421.1	23678	15176.3	19051.6	3332.97	16094.5
12	strain+Ter	22791.7	20519.6	26038.3	21227.8	20534.3	1659.55	15671.1
13	strain+Ter	21106.8	12198.5	29481	21400.9	20949.5	664.092	21197.3
	Ratio/B-ACTIN-001	CNN1-003	DRP-1-002	MFN-1-003	MFN-2-001	MFF-004	SM22-003
2	strain	0.663375	0.683365	0.37656	0.686662	0.447676	0.415338
3	strain	0.548274	0.568011	0.387804	0.566095	0.471607	0.568485
4	strain	0.548734	0.539559	0.343074	0.544779	0.385586	0.528654
5	strain+MID1	0.967422	0.733246	0.515777	0.587922	0.572936	0.673308
6	strain+MID1	0.964	0.922222	0.3057	0.582181	0.653905	0.6914
7	strain+MID1	0.916781	0.904082	0.437207	0.635291	0.59665	0.767879
8	strain+Lef	0.691158	0.774592	0.153951	0.68443	0.449163	0.771203
9	strain+Lef	0.733933	0.765551	0.208127	0.691065	0.344731	0.771947
10	strain+Lef	0.650385	0.749441	0.259762	0.644573	0.217627	0.640234
11	strain+Ter	1.25431	1.08309	0.6942	0.871466	0.152458	0.7362
12	strain+Ter	0.90031	1.14245	0.931382	0.900955	0.0728137	0.687578
13	strain+Ter	0.577943	1.39676	1.01394	0.992551	0.0314635	1.00429
