# Supplementary material for: Aorta smooth muscle-on-a-chip reveals impaired mitochondrial dynamics as a therapeutic target for aortic aneurysm in bicuspid aortic valve disease
Source: eLife journal article supplement (doi:10.7554/elife.69310), 2021-09-06
Supplement: supp [file data.xlsx]

## Sheet: Sheet1
	B-ACTIN-1	SM22		CNN1		MFN-1		MFN-2			B-ACCTIN-2	DRP1		MFF
strain	25493.4	23994.3	0.941197	12312.1	0.482954	15067.6	0.59104	8576.41	0.336417		25735.8	3335.44	0.129603	18969.3	0.737078
strain	24327	14452	0.594072	13641.6	0.560758	16347.9	0.672005	9586.94	0.394087		18318.3	2160.14	0.117922	19383.5	1.05815
strain	18638.3	14750.2	0.791392	20112.2	1.07908	13264.5	0.711679	10879.3	0.583706		22652.3	2364.28	0.104372	24544.4	1.08352
strain+MID1	18637.9	22956.2	1.23169	23691.7	1.27116	16918.9	0.907766	13062.3	0.700843		19846.1	2309.16	0.116353	13747.1	0.692684
strain+MID1	19726.6	27791.6	1.40884	27924.8	1.41559	18987.5	0.962533	15752.2	0.798525		21251.9	3841.2	0.180746	19976.4	0.939978
strain+MID1	20446.6	22303.8	1.09083	24091.2	1.17825	15377.9	0.752101	14231.2	0.696018		20364.6	2721.24	0.133626	13796.8	0.677489
strain+Lef	20086.3	11041.3	0.54969	20669.9	1.02905	13423.6	0.668296	17315.8	0.86207		22719.2	2014.47	0.0886682	15671.1	0.689776
strain+Lef	19494.6	14541.1	0.745902	21021.5	1.07832	18187.7	0.93296	15818.1	0.811409		16938.7	1970.79	0.116348	16515.9	0.975035
strain+Lef	14755.3	9571.19	0.648663	10714.9	0.726175	15297	1.03672	14030.2	0.950858		15923.9	1831.45	0.115012	13646.1	0.856959
strain+Ter	20095.5	21882.4	1.08892	21152.8	1.05262	21607.2	1.07523	22812.8	1.13522		23582.3	3273.06	0.138793	24018.3	1.01849
strain+Ter	19840.7	14381.5	0.724848	16135.5	0.81325	20238.3	1.02004	16467.6	0.829988		21804.8	2596.31	0.119071	16382.9	0.751343
strain+Ter	18811.7	7997.87	0.425155	13381.1	0.71132	18521.6	0.98458	20769	1.10405		22588.1	2294.5	0.10158	15149.6	0.670688
