# Supplementary material for: Aorta smooth muscle-on-a-chip reveals impaired mitochondrial dynamics as a therapeutic target for aortic aneurysm in bicuspid aortic valve disease
Source: eLife journal article supplement (doi:10.7554/elife.69310), 2021-09-06
Supplement: supp [file data.xlsx]

## Sheet: Sheet2
		B-ACTIN-001	B-ACTIN-002	CNN1-001	DRP-1-002	MFF-002	MFN-2-001	MFN-1-004	P-MFF-003	SM22-001
2	strain	27768.5	29708.5	7225.44	252.849	17599.7	19067.6	11976.5	10757.4	16374.7
3	strain	26631.8	28066.7	8904.39	1207.38	16534.9	18921.3	12296.3	10528.2	18509.5
4	strain	26737	26190.2	11223.9	73.778	17236.7	15781.7	14331.8	13344.7	18383.8
5	strain+MID1	27345.2	27527.1	16065.2	542.82	17712.9	13145.6	18739.6	17560.3	23002.1
6	strain+MID1	28151.8	27246.5	17902.3	1760.15	17558.5	16619.6	16842.2	15558.9	22231.7
7	strain+MID1	28123.9	28253.1	17518.7	725.527	17425.2	13023.4	15356.6	14992.1	20489.2
8	strain+Lef	30366.3	29422	19738.3	4111.66	22825.1	13139.1	15220.5	13924.1	21250.5
9	strain+Lef	29456.6	28320.5	20372.1	4375.42	20536.3	17319.3	16879.9	13151.2	21680.3
10	strain+Lef	28904	27661	19307.5	4752.12	17253.9	16798.2	11229.1	15534.1	23112.8
11	strain+Ter	31281.4	27123.1	17681.5	9258.8	12061.3	21574.1	9068.36	16776.8	24878.9
12	strain+Ter	29394.7	26837.9	16789.7	11409.5	11963.8	21055	14128.7	17042.5	23515.7
13	strain+Ter	28491.4	29017.8	18447	17004.1	12390.2	24660.6	14503.9	13456.2	22426
				CNN1-001	DRP-1-002	MFF-002	MFN-2-001	MFN-1-004	MFF-003	SM22-001
2	strain			0.243211	0.00910561	0.633802	0.641825	0.403133	0.362099	0.551178
3	strain			0.317258	0.0453358	0.620869	0.674156	0.43811	0.375114	0.659482
4	strain			0.428552	0.0027594	0.644674	0.602581	0.547219	0.509527	0.701933
5	strain+MID1			0.583613	0.0198506	0.647752	0.477549	0.680768	0.637928	0.835615
6	strain+MID1			0.657048	0.0625237	0.623708	0.609971	0.618143	0.571043	0.815946
7	strain+MID1			0.620062	0.0257975	0.619586	0.460954	0.543536	0.530637	0.725203
8	strain+Lef			0.670867	0.135402	0.75166	0.446573	0.517315	0.473253	0.722265
9	strain+Lef			0.719342	0.148538	0.69717	0.611548	0.596033	0.46437	0.765535
10	strain+Lef			0.698006	0.16441	0.596937	0.60729	0.405956	0.561588	0.835575
11	strain+Ter			0.651896	0.295984	0.385573	0.795413	0.33434	0.618541	0.917259
12	strain+Ter			0.625599	0.388146	0.407003	0.784524	0.526448	0.635018	0.876213
13	strain+Ter			0.635712	0.596816	0.434876	0.849843	0.499826	0.463721	0.772835
