# Supplementary material for: Aorta smooth muscle-on-a-chip reveals impaired mitochondrial dynamics as a therapeutic target for aortic aneurysm in bicuspid aortic valve disease
Source: eLife journal article supplement (doi:10.7554/elife.69310), 2021-09-06
Supplement: supp [file elife-69310-supp-v1.zip]

## Sheet: Specimen_RawData_1
velocity	6	mm/min
time	displacement	load	stretch length	tensile strain	stress
(s)	(mm)	(N)	(mm)	(mm/mm)	(MPa)	stretching%	Kpa
0	0.48398	-0.00018	-0.00126	-0.00036	-0.00043	-0.126	-0.43
0.1	0.48475	-0.0001	-0.00048	-0.00014	-0.00025	-0.048	-0.25
0.2	0.48537	0.00028	0.00013	4e-05	0.00066	0.013	0.66
0.3	0.49435	0.00035	0.00911	0.00261	0.00082	0.911	0.82
0.4	0.51088	0.00027	0.02564	0.00735	0.00065	2.564	0.65
0.5	0.52168	0.00144	0.03644	0.01045	0.00344	3.644	3.44
0.6	0.53146	0.00228	0.04623	0.01326	0.00544	4.623	5.44
0.7	0.54124	0.00475	0.05601	0.01607	0.01132	5.601	11.32
0.8	0.55175	0.00402	0.06651	0.01908	0.00958	6.651	9.58
0.9	0.56156	0.00501	0.07632	0.02189	0.01193	7.632	11.93
1	0.57178	0.00382	0.08655	0.02482	0.0091	8.655	9.1
1.1	0.58118	0.00653	0.09595	0.02752	0.01556	9.595	15.56
1.2	0.59116	0.00618	0.10592	0.03038	0.01472	10.592	14.72
1.3	0.60218	0.00671	0.11694	0.03354	0.01597	11.694	15.97
1.4	0.6113	0.00827	0.12606	0.03616	0.01969	12.606	19.69
1.5	0.62091	0.00752	0.13567	0.03892	0.01791	13.567	17.91
1.6	0.63178	0.0119	0.14654	0.04203	0.02834	14.654	28.34
1.7	0.64118	0.01044	0.15594	0.04473	0.02487	15.594	24.87
1.8	0.65101	0.00825	0.16578	0.04755	0.01965	16.578	19.65
1.9	0.66184	0.01137	0.17661	0.05066	0.02708	17.661	27.08
2	0.67133	0.01198	0.18609	0.05338	0.02853	18.609	28.53
2.1	0.68111	0.01259	0.19588	0.05618	0.02997	19.588	29.97
2.2	0.69155	0.01438	0.20632	0.05918	0.03424	20.632	34.24
2.3	0.70155	0.0157	0.21632	0.06205	0.03739	21.632	37.39
2.4	0.71165	0.01491	0.22642	0.06494	0.03549	22.642	35.49
2.5	0.7214	0.01646	0.23617	0.06774	0.03919	23.617	39.19
2.6	0.73137	0.01822	0.24613	0.0706	0.04338	24.613	43.38
2.7	0.74156	0.01802	0.25633	0.07352	0.0429	25.633	42.9
2.8	0.75121	0.01716	0.26597	0.07629	0.04086	26.597	40.86
2.9	0.76191	0.02108	0.27668	0.07936	0.05018	27.668	50.18
3	0.77205	0.01892	0.28681	0.08227	0.04505	28.681	45.05
3.1	0.7809	0.02384	0.29566	0.08481	0.05677	29.566	56.77
3.2	0.79157	0.02155	0.30634	0.08787	0.0513	30.634	51.3
3.3	0.80162	0.02398	0.31639	0.09075	0.05709	31.639	57.09
3.4	0.81072	0.02397	0.32548	0.09336	0.05707	32.548	57.07
3.5	0.82176	0.02472	0.33652	0.09653	0.05886	33.652	58.86
3.6	0.83178	0.02368	0.34654	0.0994	0.05637	34.654	56.37
3.7	0.84126	0.02607	0.35602	0.10212	0.06207	35.602	62.07
3.8	0.85144	0.02729	0.36621	0.10504	0.06498	36.621	64.98
3.9	0.86164	0.0276	0.37641	0.10797	0.06572	37.641	65.72
4	0.87194	0.02997	0.38671	0.11092	0.07137	38.671	71.37
4.1	0.88133	0.03116	0.39609	0.11361	0.0742	39.609	74.2
4.2	0.89123	0.02993	0.406	0.11645	0.07126	40.6	71.26
4.3	0.90201	0.03045	0.41678	0.11955	0.07249	41.678	72.49
4.4	0.9111	0.03231	0.42587	0.12215	0.07694	42.587	76.94
4.5	0.92114	0.03268	0.4359	0.12503	0.07782	43.59	77.82
4.6	0.9322	0.03745	0.44697	0.12821	0.08916	44.697	89.16
4.7	0.94118	0.0355	0.45595	0.13078	0.08452	45.595	84.52
4.8	0.95092	0.03728	0.46569	0.13358	0.08876	46.569	88.76
4.9	0.96167	0.03909	0.47644	0.13666	0.09308	47.644	93.08
5	0.97138	0.03726	0.48615	0.13944	0.08871	48.615	88.71
5.1	0.98129	0.0383	0.49606	0.14229	0.0912	49.606	91.2
5.2	0.99168	0.03993	0.50645	0.14527	0.09506	50.645	95.06
5.3	1.00152	0.04073	0.51628	0.14809	0.09698	51.628	96.98
5.4	1.01126	0.04189	0.52603	0.15088	0.09975	52.603	99.75
5.5	1.02126	0.04165	0.53602	0.15375	0.09915	53.602	99.15
5.6	1.03169	0.04338	0.54646	0.15674	0.10328	54.646	103.28
5.7	1.04182	0.04419	0.55659	0.15965	0.10522	55.659	105.22
5.8	1.05106	0.04578	0.56583	0.1623	0.109	56.583	109
5.9	1.0616	0.04471	0.57637	0.16532	0.10644	57.637	106.44
6	1.07178	0.04459	0.58654	0.16824	0.10616	58.654	106.16
6.1	1.0809	0.04503	0.59566	0.17086	0.10722	59.566	107.22
6.2	1.09199	0.04767	0.60675	0.17404	0.11349	60.675	113.49
6.3	1.10185	0.04992	0.61662	0.17687	0.11885	61.662	118.85
6.4	1.11088	0.04914	0.62564	0.17946	0.11701	62.564	117.01
6.5	1.12154	0.04994	0.63631	0.18252	0.1189	63.631	118.9
6.6	1.13163	0.05229	0.6464	0.18541	0.12451	64.64	124.51
6.7	1.14132	0.051	0.65608	0.18819	0.12144	65.608	121.44
6.8	1.15173	0.05429	0.66649	0.19117	0.12927	66.649	129.27
6.9	1.1616	0.053	0.67636	0.194	0.12618	67.636	126.18
7	1.17178	0.05416	0.68654	0.19692	0.12895	68.654	128.95
7.1	1.18122	0.05532	0.69598	0.19963	0.13171	69.598	131.71
7.2	1.19131	0.05813	0.70608	0.20253	0.1384	70.608	138.4
7.3	1.20232	0.05392	0.71709	0.20568	0.12838	71.709	128.38
7.4	1.21116	0.05866	0.72592	0.20822	0.13966	72.592	139.66
7.5	1.22085	0.05745	0.73561	0.211	0.13679	73.561	136.79
7.6	1.23184	0.05806	0.7466	0.21415	0.13824	74.66	138.24
7.7	1.2412	0.06067	0.75597	0.21684	0.14444	75.597	144.44
7.8	1.25095	0.06069	0.76571	0.21963	0.1445	76.571	144.5
7.9	1.26195	0.06302	0.77671	0.22279	0.15004	77.671	150.04
8	1.27144	0.06226	0.78621	0.22551	0.14824	78.621	148.24
8.1	1.28108	0.06458	0.79585	0.22828	0.15375	79.585	153.75
8.2	1.29152	0.06479	0.80628	0.23127	0.15426	80.628	154.26
8.3	1.3014	0.06583	0.81616	0.2341	0.15673	81.616	156.73
8.4	1.3116	0.06486	0.82637	0.23703	0.15443	82.637	154.43
8.5	1.32136	0.06646	0.83612	0.23983	0.15825	83.612	158.25
8.6	1.33138	0.06654	0.84615	0.2427	0.15843	84.615	158.43
8.7	1.3417	0.06773	0.85646	0.24566	0.16127	85.646	161.27
8.8	1.35114	0.06754	0.86591	0.24837	0.16082	86.591	160.82
8.9	1.36181	0.06904	0.87658	0.25143	0.16439	87.658	164.39
9	1.372	0.06944	0.88677	0.25436	0.16533	88.677	165.33
9.1	1.38077	0.06994	0.89554	0.25687	0.16652	89.554	166.52
9.2	1.39168	0.07404	0.90645	0.26	0.17629	90.645	176.29
9.3	1.40184	0.07449	0.91661	0.26291	0.17736	91.661	177.36
9.4	1.41108	0.07466	0.92585	0.26556	0.17777	92.585	177.77
9.5	1.4219	0.07379	0.93666	0.26867	0.17569	93.666	175.69
9.6	1.43167	0.07583	0.94644	0.27147	0.18055	94.644	180.55
9.7	1.44124	0.07557	0.956	0.27421	0.17992	95.6	179.92
9.8	1.45135	0.07632	0.96611	0.27711	0.18172	96.611	181.72
9.9	1.46158	0.07727	0.97635	0.28005	0.18397	97.635	183.97
10	1.47203	0.07884	0.98679	0.28305	0.18772	98.679	187.72
10.1	1.48132	0.07748	0.99608	0.28571	0.18449	99.608	184.49
10.2	1.49128	0.07896	1.00604	0.28857	0.18799	100.604	187.99
10.3	1.50186	0.08227	1.01662	0.2916	0.19588	101.662	195.88
10.4	1.51118	0.08092	1.02594	0.29428	0.19265	102.594	192.65
10.5	1.52113	0.08146	1.03589	0.29713	0.19395	103.589	193.95
10.6	1.53206	0.08202	1.04683	0.30027	0.19529	104.683	195.29
10.7	1.54122	0.08364	1.05598	0.30289	0.19915	105.598	199.15
10.8	1.55102	0.0831	1.06578	0.3057	0.19786	106.578	197.86
10.9	1.56164	0.08562	1.07641	0.30875	0.20387	107.641	203.87
11	1.57131	0.08417	1.08608	0.31152	0.20041	108.608	200.41
11.1	1.58119	0.08579	1.09595	0.31436	0.20427	109.595	204.27
11.2	1.59166	0.08723	1.10643	0.31736	0.20768	110.643	207.68
11.3	1.60146	0.08571	1.11623	0.32017	0.20407	111.623	204.07
11.4	1.61135	0.08859	1.12611	0.32301	0.21092	112.611	210.92
11.5	1.62144	0.08753	1.1362	0.3259	0.20839	113.62	208.39
11.6	1.63157	0.08912	1.14633	0.32881	0.2122	114.633	212.2
11.7	1.64202	0.09146	1.15678	0.3318	0.21776	115.678	217.76
11.8	1.65107	0.09044	1.16584	0.3344	0.21532	116.584	215.32
11.9	1.66157	0.09002	1.17634	0.33741	0.21434	117.634	214.34
12	1.67183	0.09367	1.1866	0.34036	0.22302	118.66	223.02
12.1	1.68099	0.09231	1.19576	0.34298	0.2198	119.576	219.8
12.2	1.69206	0.09502	1.20682	0.34616	0.22624	120.682	226.24
12.3	1.70181	0.09429	1.21657	0.34895	0.22451	121.657	224.51
12.4	1.71075	0.09568	1.22551	0.35152	0.22781	122.551	227.81
12.5	1.72123	0.09501	1.23599	0.35452	0.2262	123.599	226.2
12.6	1.7314	0.09797	1.24617	0.35744	0.23326	124.617	233.26
12.7	1.74141	0.09826	1.25617	0.36031	0.23394	125.617	233.94
12.8	1.75173	0.0991	1.2665	0.36328	0.23596	126.65	235.96
12.9	1.76143	0.10045	1.27619	0.36606	0.23916	127.619	239.16
13	1.77174	0.09952	1.28651	0.36901	0.23696	128.651	236.96
13.1	1.78117	0.09993	1.29594	0.37172	0.23793	129.594	237.93
13.2	1.79128	0.10147	1.30604	0.37462	0.24159	130.604	241.59
13.3	1.80219	0.10489	1.31695	0.37775	0.24974	131.695	249.74
13.4	1.81122	0.10487	1.32599	0.38034	0.24968	132.599	249.68
13.5	1.82105	0.10578	1.33581	0.38316	0.25187	133.581	251.87
13.6	1.83176	0.1044	1.34653	0.38623	0.24857	134.653	248.57
13.7	1.84123	0.10608	1.356	0.38895	0.25258	135.6	252.58
13.8	1.85106	0.1048	1.36583	0.39177	0.24953	136.583	249.53
13.9	1.8619	0.10642	1.37666	0.39487	0.25337	137.666	253.37
14	1.87129	0.10848	1.38605	0.39757	0.25827	138.605	258.27
14.1	1.88103	0.10754	1.39579	0.40036	0.25604	139.579	256.04
14.2	1.89156	0.11035	1.40632	0.40338	0.26275	140.632	262.75
14.3	1.9015	0.11047	1.41627	0.40623	0.26303	141.627	263.03
14.4	1.91158	0.11005	1.42634	0.40912	0.26203	142.634	262.03
14.5	1.9214	0.11023	1.43616	0.41194	0.26244	143.616	262.44
14.6	1.9314	0.11246	1.44616	0.41481	0.26777	144.616	267.77
14.7	1.94164	0.1126	1.45641	0.41775	0.2681	145.641	268.1
14.8	1.95107	0.11287	1.46584	0.42045	0.26873	146.584	268.73
14.9	1.96188	0.11203	1.47665	0.42355	0.26675	147.665	266.75
15	1.97209	0.11467	1.48686	0.42648	0.27303	148.686	273.03
15.1	1.98076	0.11308	1.49552	0.42897	0.26925	149.552	269.25
15.2	1.99163	0.11548	1.5064	0.43209	0.27494	150.64	274.94
15.3	2.00176	0.11638	1.51652	0.43499	0.27708	151.652	277.08
15.4	2.01104	0.11557	1.5258	0.43765	0.27517	152.58	275.17
15.5	2.02194	0.11654	1.5367	0.44078	0.27748	153.67	277.48
15.6	2.03164	0.1193	1.54641	0.44356	0.28406	154.641	284.06
15.7	2.04116	0.11951	1.55592	0.44629	0.28455	155.592	284.55
15.8	2.05135	0.1197	1.56611	0.44921	0.285	156.611	285
15.9	2.06156	0.12156	1.57633	0.45214	0.28943	157.633	289.43
16	2.07212	0.11745	1.58689	0.45517	0.27965	158.689	279.65
16.1	2.08138	0.12205	1.59615	0.45783	0.29059	159.615	290.59
16.2	2.09132	0.12181	1.60609	0.46068	0.29001	160.609	290.01
16.3	2.10184	0.12136	1.6166	0.4637	0.28895	161.66	288.95
16.4	2.11117	0.12353	1.62593	0.46637	0.29411	162.593	294.11
16.5	2.12117	0.12605	1.63593	0.46924	0.30012	163.593	300.12
16.6	2.13225	0.12492	1.64702	0.47242	0.29742	164.702	297.42
16.7	2.14113	0.12528	1.6559	0.47497	0.29829	165.59	298.29
16.8	2.15084	0.1263	1.66561	0.47775	0.30072	166.561	300.72
16.9	2.1617	0.12627	1.67647	0.48087	0.30063	167.647	300.63
17	2.17143	0.1287	1.6862	0.48366	0.30643	168.62	306.43
17.1	2.18123	0.12802	1.696	0.48647	0.30482	169.6	304.82
17.2	2.19176	0.13022	1.70652	0.48949	0.31004	170.652	310.04
17.3	2.20151	0.12867	1.71628	0.49229	0.30636	171.628	306.36
17.4	2.21127	0.131	1.72604	0.49509	0.3119	172.604	311.9
17.5	2.22139	0.12952	1.73616	0.49799	0.30839	173.616	308.39
17.6	2.23171	0.13201	1.74647	0.50095	0.3143	174.647	314.3
17.7	2.24177	0.13173	1.75653	0.50383	0.31365	175.653	313.65
17.8	2.25094	0.13297	1.7657	0.50646	0.31659	176.57	316.59
17.9	2.26139	0.13448	1.77615	0.50946	0.32019	177.615	320.19
18	2.27171	0.13598	1.78648	0.51242	0.32376	178.648	323.76
18.1	2.28091	0.13543	1.79568	0.51506	0.32245	179.568	322.45
18.2	2.29213	0.13648	1.80689	0.51828	0.32495	180.689	324.95
18.3	2.30198	0.13504	1.81674	0.5211	0.32152	181.674	321.52
18.4	2.31083	0.13845	1.8256	0.52364	0.32965	182.56	329.65
18.5	2.32147	0.13895	1.83623	0.52669	0.33084	183.623	330.84
18.6	2.33164	0.14017	1.84641	0.52961	0.33375	184.641	333.75
18.7	2.34133	0.14044	1.85609	0.53239	0.33439	185.609	334.39
18.8	2.35173	0.1404	1.8665	0.53538	0.33429	186.65	334.29
18.9	2.36157	0.14023	1.87634	0.5382	0.33388	187.634	333.88
19	2.37157	0.14175	1.88634	0.54107	0.3375	188.634	337.5
19.1	2.38113	0.14055	1.8959	0.54381	0.33463	189.59	334.63
19.2	2.39134	0.14389	1.90611	0.54674	0.34259	190.611	342.59
19.3	2.40224	0.14529	1.91701	0.54986	0.34592	191.701	345.92
19.4	2.41113	0.14386	1.9259	0.55241	0.34251	192.59	342.51
19.5	2.42095	0.14451	1.93572	0.55523	0.34406	193.572	344.06
19.6	2.43192	0.14525	1.94669	0.55838	0.34583	194.669	345.83
19.7	2.44115	0.1466	1.95591	0.56102	0.34906	195.591	349.06
19.8	2.45096	0.14675	1.96573	0.56384	0.34941	196.573	349.41
19.9	2.46194	0.14823	1.97671	0.56699	0.35294	197.671	352.94
20	2.4713	0.14685	1.98607	0.56967	0.34964	198.607	349.64
20.1	2.48096	0.14873	1.99573	0.57244	0.35413	199.573	354.13
20.2	2.49144	0.14826	2.0062	0.57545	0.35299	200.62	352.99
20.3	2.50161	0.14786	2.01638	0.57837	0.35205	201.638	352.05
20.4	2.51154	0.14925	2.0263	0.58121	0.35537	202.63	355.37
20.5	2.52129	0.15045	2.03606	0.58401	0.35821	203.606	358.21
20.6	2.5316	0.15145	2.04636	0.58697	0.36059	204.636	360.59
20.7	2.54164	0.15199	2.0564	0.58985	0.36188	205.64	361.88
20.8	2.55106	0.15348	2.06582	0.59255	0.36543	206.582	365.43
20.9	2.56187	0.15477	2.07664	0.59565	0.3685	207.664	368.5
21	2.57191	0.15538	2.08667	0.59853	0.36996	208.667	369.96
21.1	2.58086	0.15672	2.09563	0.6011	0.37315	209.563	373.15
21.2	2.59177	0.15578	2.10654	0.60423	0.37091	210.654	370.91
21.3	2.60184	0.15674	2.11661	0.60711	0.37319	211.661	373.19
21.4	2.6108	0.15544	2.12556	0.60968	0.37009	212.556	370.09
21.5	2.62171	0.15797	2.13648	0.61281	0.37611	213.648	376.11
21.6	2.63175	0.15852	2.14652	0.6157	0.37742	214.652	377.42
21.7	2.64117	0.1583	2.15593	0.6184	0.3769	215.593	376.9
21.8	2.65145	0.16073	2.16621	0.62134	0.3827	216.621	382.7
21.9	2.66164	0.16184	2.1764	0.62427	0.38534	217.64	385.34
22	2.672	0.16092	2.18677	0.62724	0.38314	218.677	383.14
22.1	2.68133	0.16224	2.1961	0.62992	0.38629	219.61	386.29
22.2	2.69134	0.16409	2.2061	0.63278	0.39069	220.61	390.69
22.3	2.70205	0.16303	2.21681	0.63586	0.38816	221.681	388.16
22.4	2.71096	0.16472	2.22573	0.63842	0.39218	222.573	392.18
22.5	2.72102	0.16326	2.23578	0.6413	0.38872	223.578	388.72
22.6	2.73227	0.1655	2.24704	0.64453	0.39406	224.704	394.06
22.7	2.74121	0.16555	2.25598	0.64709	0.39418	225.598	394.18
22.8	2.75083	0.16689	2.26559	0.64985	0.39736	226.559	397.36
22.9	2.7618	0.16927	2.27656	0.653	0.40303	227.656	403.03
23	2.77143	0.16729	2.28619	0.65576	0.3983	228.619	398.3
23.1	2.78122	0.16893	2.29599	0.65857	0.40222	229.599	402.22
23.2	2.79183	0.17018	2.30659	0.66161	0.40519	230.659	405.19
23.3	2.80154	0.17136	2.31631	0.6644	0.408	231.631	408
23.4	2.81124	0.17085	2.32601	0.66718	0.40678	232.601	406.78
23.5	2.82122	0.17241	2.33598	0.67004	0.41051	233.598	410.51
23.6	2.83166	0.1733	2.34642	0.67303	0.41263	234.642	412.63
23.7	2.84186	0.17328	2.35662	0.67596	0.41258	235.662	412.58
23.8	2.85107	0.17411	2.36583	0.6786	0.41454	236.583	414.54
23.9	2.8616	0.17517	2.37636	0.68162	0.41707	237.636	417.07
24	2.87178	0.17603	2.38655	0.68454	0.41913	238.655	419.13
24.1	2.88091	0.17648	2.39567	0.68716	0.42019	239.567	420.19
24.2	2.89209	0.17469	2.40686	0.69037	0.41594	240.686	415.94
24.3	2.9019	0.17686	2.41667	0.69318	0.42109	241.667	421.09
24.4	2.91082	0.17816	2.42558	0.69574	0.4242	242.558	424.2
24.5	2.92154	0.17844	2.43631	0.69882	0.42486	243.631	424.86
24.6	2.93171	0.17915	2.44648	0.70173	0.42654	244.648	426.54
24.7	2.94137	0.17902	2.45614	0.7045	0.42623	245.614	426.23
24.8	2.95156	0.1809	2.46632	0.70743	0.43071	246.632	430.71
24.9	2.96152	0.18159	2.47629	0.71028	0.43236	247.629	432.36
25	2.97166	0.18099	2.48642	0.71319	0.43094	248.642	430.94
25.1	2.9811	0.18144	2.49587	0.7159	0.43201	249.587	432.01
25.2	2.99135	0.18287	2.50612	0.71884	0.4354	250.612	435.4
25.3	3.00232	0.18306	2.51709	0.72199	0.43586	251.709	435.86
25.4	3.01115	0.18604	2.52591	0.72452	0.44295	252.591	442.95
25.5	3.02102	0.18638	2.53578	0.72735	0.44377	253.578	443.77
25.6	3.03193	0.18718	2.54669	0.73048	0.44567	254.669	445.67
25.7	3.04116	0.18565	2.55593	0.73313	0.44201	255.593	442.01
25.8	3.05095	0.18694	2.56572	0.73594	0.44508	256.572	445.08
25.9	3.06192	0.18735	2.57668	0.73908	0.44606	257.668	446.06
26	3.07143	0.18789	2.5862	0.74181	0.44735	258.62	447.35
26.1	3.08097	0.19059	2.59573	0.74454	0.45378	259.573	453.78
26.2	3.09155	0.18891	2.60631	0.74758	0.4498	260.631	449.8
26.3	3.10157	0.19016	2.61633	0.75045	0.45277	261.633	452.77
26.4	3.11142	0.19186	2.62618	0.75328	0.4568	262.618	456.8
26.5	3.12134	0.19089	2.6361	0.75612	0.45451	263.61	454.51
26.6	3.13156	0.19161	2.64633	0.75906	0.45622	264.633	456.22
26.7	3.14155	0.19352	2.65632	0.76192	0.46077	265.632	460.77
26.8	3.15095	0.19296	2.66572	0.76462	0.45942	266.572	459.42
26.9	3.16178	0.19302	2.67655	0.76773	0.45958	267.655	459.58
27	3.17204	0.19653	2.6868	0.77067	0.46792	268.68	467.92
27.1	3.18071	0.19562	2.69548	0.77316	0.46576	269.548	465.76
27.2	3.19166	0.19856	2.70642	0.77629	0.47276	270.642	472.76
27.3	3.20185	0.19786	2.71661	0.77922	0.47109	271.661	471.09
27.4	3.21093	0.1976	2.72569	0.78182	0.47048	272.569	470.48
27.5	3.22189	0.1976	2.73665	0.78497	0.47048	273.665	470.48
27.6	3.23169	0.20042	2.74645	0.78778	0.47718	274.645	477.18
27.7	3.24136	0.1994	2.75612	0.79055	0.47475	275.612	474.75
27.8	3.25132	0.20124	2.76609	0.79341	0.47914	276.609	479.14
27.9	3.2616	0.20131	2.77637	0.79636	0.47932	277.637	479.32
28	3.27205	0.20184	2.78682	0.79935	0.48058	278.682	480.58
28.1	3.28134	0.20252	2.7961	0.80202	0.4822	279.61	482.2
28.2	3.29127	0.20377	2.80604	0.80487	0.48516	280.604	485.16
28.3	3.302	0.20565	2.81677	0.80795	0.48965	281.677	489.65
28.4	3.31106	0.2043	2.82583	0.81054	0.48642	282.583	486.42
28.5	3.32108	0.20594	2.83584	0.81342	0.49033	283.584	490.33
28.6	3.33225	0.2049	2.84702	0.81662	0.48786	284.702	487.86
28.7	3.34124	0.20702	2.85601	0.8192	0.4929	285.601	492.9
28.8	3.3509	0.20784	2.86567	0.82197	0.49486	286.567	494.86
28.9	3.36167	0.20954	2.87643	0.82506	0.49892	287.643	498.92
29	3.37146	0.20963	2.88622	0.82787	0.49913	288.622	499.13
29.1	3.38119	0.20971	2.89595	0.83066	0.4993	289.595	499.3
29.2	3.39168	0.21204	2.90644	0.83367	0.50485	290.644	504.85
29.3	3.40146	0.213	2.91623	0.83647	0.50714	291.623	507.14
29.4	3.41114	0.21282	2.92591	0.83925	0.50671	292.591	506.71
29.5	3.42113	0.21308	2.9359	0.84212	0.50734	293.59	507.34
29.6	3.4317	0.21386	2.94647	0.84515	0.5092	294.647	509.2
29.7	3.44189	0.21484	2.95666	0.84807	0.51153	295.666	511.53
29.8	3.451	0.21631	2.96576	0.85068	0.51503	296.576	515.03
29.9	3.46157	0.21691	2.97634	0.85372	0.51644	297.634	516.44
30	3.47187	0.21609	2.98663	0.85667	0.51451	298.663	514.51
30.1	3.48097	0.21888	2.99574	0.85928	0.52114	299.574	521.14
30.2	3.4921	0.21882	3.00686	0.86247	0.521	300.686	521
30.3	3.50194	0.21909	3.01671	0.86529	0.52165	301.671	521.65
30.4	3.51091	0.21925	3.02568	0.86787	0.52203	302.568	522.03
30.5	3.52157	0.21995	3.03634	0.87093	0.52369	303.634	523.69
30.6	3.53156	0.22148	3.04632	0.87379	0.52733	304.632	527.33
30.7	3.54144	0.22182	3.05621	0.87662	0.52815	305.621	528.15
30.8	3.55157	0.22161	3.06634	0.87953	0.52764	306.634	527.64
30.9	3.56147	0.22411	3.07623	0.88237	0.53359	307.623	533.59
31	3.57185	0.2218	3.08662	0.88535	0.5281	308.662	528.1
31.1	3.58116	0.22349	3.09593	0.88802	0.53211	309.593	532.11
31.2	3.59128	0.22517	3.10604	0.89092	0.53613	310.604	536.13
31.3	3.60219	0.22686	3.11695	0.89405	0.54014	311.695	540.14
31.4	3.61127	0.22661	3.12603	0.89665	0.53955	312.603	539.55
31.5	3.62089	0.22723	3.13565	0.89941	0.54102	313.565	541.02
31.6	3.63181	0.22654	3.14657	0.90254	0.53938	314.657	539.38
31.7	3.64126	0.22798	3.15603	0.90526	0.5428	315.603	542.8
31.8	3.65108	0.22983	3.16584	0.90807	0.54722	316.584	547.22
31.9	3.66202	0.22841	3.17678	0.91121	0.54384	317.678	543.84
32	3.67145	0.2298	3.18621	0.91391	0.54714	318.621	547.14
32.1	3.68094	0.22879	3.1957	0.91664	0.54473	319.57	544.73
32.2	3.69127	0.23098	3.20603	0.9196	0.54995	320.603	549.95
32.3	3.70116	0.2331	3.21593	0.92244	0.55499	321.593	554.99
32.4	3.71154	0.23128	3.22631	0.92542	0.55068	322.631	550.68
32.5	3.72154	0.23239	3.23631	0.92828	0.5533	323.631	553.3
32.6	3.73158	0.23226	3.24635	0.93116	0.553	324.635	553
32.7	3.7417	0.23461	3.25647	0.93407	0.55859	325.647	558.59
32.8	3.75106	0.23513	3.26582	0.93675	0.55982	326.582	559.82
32.9	3.76175	0.23529	3.27652	0.93982	0.56021	327.652	560.21
33	3.77206	0.2352	3.28682	0.94277	0.56	328.682	560
33.1	3.78079	0.23622	3.29556	0.94528	0.56243	329.556	562.43
33.2	3.79167	0.23667	3.30644	0.9484	0.56351	330.644	563.51
33.3	3.80179	0.23918	3.31655	0.9513	0.56948	331.655	569.48
33.4	3.81095	0.2392	3.32572	0.95393	0.56952	332.572	569.52
33.5	3.82191	0.24006	3.33667	0.95707	0.57157	333.667	571.57
33.6	3.83174	0.24004	3.3465	0.95989	0.57152	334.65	571.52
33.7	3.84129	0.24183	3.35605	0.96263	0.57579	335.605	575.79
33.8	3.85131	0.24205	3.36607	0.9655	0.5763	336.607	576.3
33.9	3.86151	0.24141	3.37628	0.96843	0.57479	337.628	574.79
34	3.87204	0.24338	3.3868	0.97145	0.57948	338.68	579.48
34.1	3.88137	0.24286	3.39613	0.97413	0.57823	339.613	578.23
34.2	3.89127	0.24574	3.40603	0.97697	0.58511	340.603	585.11
34.3	3.90202	0.24481	3.41679	0.98005	0.58289	341.679	582.89
34.4	3.91102	0.2476	3.42578	0.98263	0.58953	342.578	589.53
34.5	3.92095	0.2458	3.43572	0.98548	0.58524	343.572	585.24
34.6	3.93222	0.24845	3.44698	0.98871	0.59156	344.698	591.56
34.7	3.94134	0.24863	3.45611	0.99133	0.59197	345.611	591.97
34.8	3.95091	0.24977	3.46567	0.99407	0.59468	346.567	594.68
34.9	3.96171	0.24819	3.47648	0.99717	0.59094	347.648	590.94
35	3.97145	0.25165	3.48622	0.99997	0.59916	348.622	599.16
35.1	3.98126	0.25236	3.49603	1.00278	0.60086	349.603	600.86
35.2	3.9916	0.25153	3.50637	1.00575	0.59888	350.637	598.88
35.3	4.00145	0.25202	3.51621	1.00857	0.60004	351.621	600.04
35.4	4.01124	0.25442	3.526	1.01138	0.60577	352.6	605.77
35.5	4.02122	0.25433	3.53599	1.01424	0.60556	353.599	605.56
35.6	4.03171	0.2529	3.54647	1.01725	0.60215	354.647	602.15
35.7	4.04205	0.25485	3.55681	1.02022	0.60679	355.681	606.79
35.8	4.051	0.25511	3.56577	1.02278	0.60741	356.577	607.41
35.9	4.06145	0.25581	3.57622	1.02578	0.60906	357.622	609.06
36	4.07178	0.25758	3.58654	1.02874	0.61329	358.654	613.29
36.1	4.0809	0.2582	3.59566	1.03136	0.61475	359.566	614.75
36.2	4.09208	0.2584	3.60684	1.03456	0.61524	360.684	615.24
36.3	4.10184	0.25889	3.6166	1.03736	0.6164	361.66	616.4
36.4	4.11088	0.25891	3.62564	1.03996	0.61646	362.564	616.46
36.5	4.12145	0.26041	3.63621	1.04299	0.62003	363.621	620.03
36.6	4.13163	0.26231	3.64639	1.04591	0.62455	364.639	624.55
36.7	4.14137	0.25862	3.65614	1.04871	0.61576	365.614	615.76
36.8	4.15157	0.26229	3.66633	1.05163	0.6245	366.633	624.5
36.9	4.16155	0.26359	3.67631	1.05449	0.62759	367.631	627.59
37	4.17187	0.26453	3.68663	1.05745	0.62983	368.663	629.83
37.1	4.18126	0.26296	3.69602	1.06015	0.62609	369.602	626.09
37.2	4.19123	0.26497	3.70599	1.06301	0.63088	370.599	630.88
37.3	4.20217	0.26651	3.71694	1.06615	0.63454	371.694	634.54
37.4	4.21116	0.26581	3.72592	1.06872	0.63288	372.592	632.88
37.5	4.22101	0.26784	3.73577	1.07155	0.63771	373.577	637.71
37.6	4.23185	0.26709	3.74661	1.07466	0.63594	374.661	635.94
37.7	4.24121	0.26908	3.75598	1.07734	0.64066	375.598	640.66
37.8	4.25096	0.26822	3.76572	1.08014	0.63861	376.572	638.61
37.9	4.2619	0.26919	3.77666	1.08328	0.64093	377.666	640.93
38	4.27131	0.26948	3.78607	1.08597	0.64161	378.607	641.61
38.1	4.28095	0.27121	3.79572	1.08874	0.64574	379.572	645.74
38.2	4.29154	0.27232	3.8063	1.09178	0.64838	380.63	648.38
38.3	4.30155	0.27132	3.81632	1.09465	0.646	381.632	646
38.4	4.3116	0.27129	3.82637	1.09753	0.64594	382.637	645.94
38.5	4.32135	0.27366	3.83612	1.10033	0.65158	383.612	651.58
38.6	4.33154	0.2747	3.84631	1.10325	0.65405	384.631	654.05
38.7	4.34176	0.27407	3.85652	1.10618	0.65256	385.652	652.56
38.8	4.35103	0.27438	3.86579	1.10884	0.65328	386.579	653.28
38.9	4.36173	0.27647	3.87649	1.11191	0.65826	387.649	658.26
39	4.37209	0.27717	3.88685	1.11488	0.65993	388.685	659.93
39.1	4.38082	0.27836	3.89558	1.11739	0.66277	389.558	662.77
39.2	4.39158	0.27766	3.90634	1.12047	0.66109	390.634	661.09
39.3	4.40181	0.27899	3.91658	1.12341	0.66425	391.658	664.25
39.4	4.41107	0.28196	3.92584	1.12606	0.67134	392.584	671.34
39.5	4.42194	0.27956	3.9367	1.12918	0.66562	393.67	665.62
39.6	4.43176	0.28236	3.94653	1.132	0.67229	394.653	672.29
39.7	4.44125	0.28251	3.95602	1.13472	0.67264	395.602	672.64
39.8	4.45135	0.28408	3.96612	1.13762	0.67637	396.612	676.37
39.9	4.46156	0.28304	3.97632	1.14055	0.67389	397.632	673.89
40	4.47203	0.28403	3.9868	1.14355	0.67625	398.68	676.25
40.1	4.48139	0.28267	3.99616	1.14623	0.67302	399.616	673.02
40.2	4.49117	0.28522	4.00594	1.14904	0.67911	400.594	679.11
40.3	4.50193	0.28603	4.01669	1.15213	0.68102	401.669	681.02
40.4	4.51109	0.28693	4.02586	1.15475	0.68318	402.586	683.18
40.5	4.52113	0.28693	4.03589	1.15763	0.68316	403.589	683.16
40.6	4.53206	0.28907	4.04682	1.16077	0.68825	404.682	688.25
40.7	4.54123	0.28877	4.05599	1.1634	0.68756	405.599	687.56
40.8	4.55084	0.29028	4.0656	1.16615	0.69113	406.56	691.13
40.9	4.56178	0.28996	4.07655	1.16929	0.69037	407.655	690.37
41	4.57153	0.28979	4.0863	1.17209	0.68997	408.63	689.97
41.1	4.58112	0.29212	4.09589	1.17484	0.69553	409.589	695.53
41.2	4.59171	0.29188	4.10647	1.17788	0.69495	410.647	694.95
41.3	4.60137	0.29261	4.11613	1.18065	0.69669	411.613	696.69
41.4	4.61126	0.29295	4.12603	1.18349	0.69751	412.603	697.51
41.5	4.62129	0.29396	4.13606	1.18636	0.69991	413.606	699.91
41.6	4.63154	0.29607	4.14631	1.1893	0.70493	414.631	704.93
41.7	4.64204	0.29789	4.15681	1.19231	0.70927	415.681	709.27
41.8	4.65109	0.29793	4.16585	1.19491	0.70937	416.585	709.37
41.9	4.6616	0.29641	4.17637	1.19793	0.70573	417.637	705.73
42	4.6718	0.29829	4.18656	1.20085	0.71021	418.656	710.21
42.1	4.68091	0.2984	4.19567	1.20346	0.71047	419.567	710.47
42.2	4.69202	0.29957	4.20678	1.20665	0.71326	420.678	713.26
42.3	4.70186	0.29971	4.21662	1.20947	0.71359	421.662	713.59
42.4	4.71094	0.30011	4.22571	1.21208	0.71456	422.571	714.56
42.5	4.72152	0.30191	4.23629	1.21511	0.71884	423.629	718.84
42.6	4.73162	0.30397	4.24639	1.21801	0.72373	424.639	723.73
42.7	4.74149	0.30288	4.25625	1.22084	0.72113	425.625	721.13
42.8	4.75171	0.302	4.26647	1.22377	0.71905	426.647	719.05
42.9	4.76148	0.30471	4.27625	1.22657	0.72549	427.625	725.49
43	4.77166	0.30465	4.28643	1.22949	0.72535	428.643	725.35
43.1	4.78124	0.30607	4.29601	1.23224	0.72875	429.601	728.75
43.2	4.79129	0.30628	4.30605	1.23512	0.72925	430.605	729.25
43.3	4.80212	0.3065	4.31688	1.23823	0.72977	431.688	729.77
43.4	4.81124	0.30827	4.326	1.24085	0.73397	432.6	733.97
43.5	4.82092	0.30705	4.33569	1.24362	0.73107	433.569	731.07
43.6	4.83168	0.30741	4.34645	1.24671	0.73192	434.645	731.92
43.7	4.84134	0.31069	4.35611	1.24948	0.73973	435.611	739.73
43.8	4.85105	0.3092	4.36582	1.25227	0.7362	436.582	736.2
43.9	4.86192	0.31158	4.37668	1.25538	0.74187	437.668	741.87
44	4.87137	0.3134	4.38614	1.25809	0.74619	438.614	746.19
44.1	4.88107	0.31095	4.39583	1.26087	0.74035	439.583	740.35
44.2	4.8915	0.31325	4.40627	1.26387	0.74584	440.627	745.84
44.3	4.90137	0.31351	4.41613	1.2667	0.74646	441.613	746.46
44.4	4.91175	0.31356	4.42652	1.26968	0.74656	442.652	746.56
44.5	4.92126	0.31491	4.43602	1.2724	0.74978	443.602	749.78
44.6	4.93145	0.31582	4.44622	1.27533	0.75195	444.622	751.95
44.7	4.9418	0.31789	4.45656	1.27829	0.75688	445.656	756.88
44.8	4.9511	0.31627	4.46586	1.28096	0.75302	446.586	753.02
44.9	4.96178	0.31788	4.47654	1.28402	0.75686	447.654	756.86
45	4.97204	0.31975	4.4868	1.28697	0.76131	448.68	761.31
45.1	4.98095	0.32101	4.49572	1.28952	0.7643	449.572	764.3
45.2	4.9916	0.32136	4.50637	1.29258	0.76513	450.637	765.13
45.3	5.00168	0.32162	4.51644	1.29547	0.76576	451.644	765.76
45.4	5.01109	0.32343	4.52585	1.29817	0.77008	452.585	770.08
45.5	5.02183	0.32555	4.5366	1.30125	0.77512	453.66	775.12
45.6	5.03161	0.32444	4.54637	1.30405	0.77247	454.637	772.47
45.7	5.04128	0.32646	4.55604	1.30683	0.77728	455.604	777.28
45.8	5.05149	0.3262	4.56626	1.30976	0.77666	456.626	776.66
45.9	5.0616	0.3276	4.57637	1.31266	0.78	457.637	780
46	5.07204	0.32776	4.5868	1.31565	0.78038	458.68	780.38
46.1	5.08144	0.32715	4.5962	1.31835	0.77893	459.62	778.93
46.2	5.09121	0.33042	4.60597	1.32115	0.78672	460.597	786.72
46.3	5.10186	0.32873	4.61663	1.32421	0.7827	461.663	782.7
46.4	5.11129	0.32684	4.62605	1.32691	0.77819	462.605	778.19
46.5	5.12116	0.33187	4.63593	1.32974	0.79017	463.593	790.17
46.6	5.13194	0.33043	4.6467	1.33283	0.78673	464.67	786.73
46.7	5.14106	0.3327	4.65583	1.33545	0.79215	465.583	792.15
46.8	5.15075	0.33614	4.66552	1.33823	0.80033	466.552	800.33
46.9	5.16169	0.33382	4.67646	1.34137	0.79482	467.646	794.82
47	5.17152	0.335	4.68628	1.34419	0.79763	468.628	797.63
47.1	5.1813	0.33535	4.69606	1.34699	0.79846	469.606	798.46
47.2	5.19169	0.33523	4.70646	1.34997	0.79817	470.646	798.17
47.3	5.20135	0.33728	4.71612	1.35274	0.80305	471.612	803.05
47.4	5.21125	0.33894	4.72602	1.35558	0.807	472.602	807
47.5	5.22129	0.33769	4.73605	1.35846	0.80402	473.605	804.02
47.6	5.23159	0.33973	4.74635	1.36142	0.80887	474.635	808.87
47.7	5.24199	0.34028	4.75676	1.3644	0.81019	475.676	810.19
47.8	5.25115	0.34172	4.76591	1.36703	0.81361	476.591	813.61
47.9	5.26147	0.34051	4.77623	1.36999	0.81073	477.623	810.73
48	5.2718	0.34362	4.78656	1.37295	0.81815	478.656	818.15
48.1	5.28103	0.34527	4.79579	1.3756	0.82207	479.579	822.07
48.2	5.29193	0.34381	4.8067	1.37872	0.81859	480.67	818.59
48.3	5.3018	0.34578	4.81656	1.38156	0.82328	481.656	823.28
48.4	5.31099	0.34534	4.82576	1.38419	0.82224	482.576	822.24
48.5	5.32156	0.34662	4.83632	1.38722	0.82528	483.632	825.28
48.6	5.33153	0.34712	4.8463	1.39008	0.82648	484.63	826.48
48.7	5.34141	0.34843	4.85618	1.39292	0.82959	485.618	829.59
48.8	5.35183	0.35041	4.8666	1.39591	0.83432	486.66	834.32
48.9	5.36148	0.34982	4.87624	1.39867	0.8329	487.624	832.9
49	5.37176	0.35112	4.88653	1.40162	0.83599	488.653	835.99
49.1	5.38113	0.35204	4.8959	1.40431	0.83819	489.59	838.19
49.2	5.3912	0.35119	4.90597	1.4072	0.83617	490.597	836.17
49.3	5.4022	0.35348	4.91696	1.41035	0.84163	491.696	841.63
49.4	5.41125	0.35381	4.92602	1.41295	0.84239	492.602	842.39
49.5	5.42095	0.35432	4.93571	1.41573	0.84361	493.571	843.61
49.6	5.43176	0.35514	4.94652	1.41883	0.84557	494.652	845.57
49.7	5.4413	0.35544	4.95606	1.42157	0.8463	495.606	846.3
49.8	5.45107	0.35429	4.96584	1.42437	0.84354	496.584	843.54
49.9	5.46185	0.35865	4.97662	1.42746	0.85393	497.662	853.93
50	5.4713	0.35852	4.98606	1.43017	0.85363	498.606	853.63
50.1	5.48096	0.3587	4.99572	1.43294	0.85404	499.572	854.04
50.2	5.49152	0.35938	5.00628	1.43597	0.85566	500.628	855.66
50.3	5.50137	0.36247	5.01613	1.4388	0.86304	501.613	863.04
50.4	5.51165	0.3615	5.02642	1.44175	0.86071	502.642	860.71
50.5	5.52138	0.36384	5.03614	1.44454	0.86629	503.614	866.29
50.6	5.53145	0.36368	5.04621	1.44743	0.86591	504.621	865.91
50.7	5.54175	0.36559	5.05652	1.45038	0.87046	505.652	870.46
50.8	5.55107	0.36774	5.06584	1.45306	0.87557	506.584	875.57
50.9	5.5618	0.36492	5.07656	1.45613	0.86885	507.656	868.85
51	5.57207	0.36758	5.08684	1.45908	0.8752	508.684	875.2
51.1	5.58096	0.36632	5.09573	1.46163	0.87219	509.573	872.19
51.2	5.59168	0.36843	5.10645	1.4647	0.87722	510.645	877.22
51.3	5.60175	0.37223	5.11651	1.46759	0.88626	511.651	886.26
51.4	5.61099	0.3715	5.12576	1.47024	0.88452	512.576	884.52
51.5	5.62184	0.36994	5.1366	1.47335	0.8808	513.66	880.8
51.6	5.63165	0.37203	5.14641	1.47617	0.88578	514.641	885.78
51.7	5.64129	0.37291	5.15606	1.47893	0.88787	515.606	887.87
51.8	5.6513	0.3739	5.16606	1.4818	0.89024	516.606	890.24
51.9	5.66146	0.37571	5.17622	1.48472	0.89454	517.622	894.54
52	5.67186	0.37623	5.18662	1.4877	0.89579	518.662	895.79
52.1	5.68141	0.37588	5.19617	1.49044	0.89494	519.617	894.94
52.2	5.69133	0.37799	5.2061	1.49329	0.89998	520.61	899.98
52.3	5.702	0.37864	5.21676	1.49635	0.90151	521.676	901.51
52.4	5.7111	0.38051	5.22587	1.49896	0.90597	522.587	905.97
52.5	5.72105	0.37888	5.23582	1.50181	0.90209	523.582	902.09
52.6	5.73211	0.38033	5.24688	1.50498	0.90554	524.688	905.54
52.7	5.74119	0.38221	5.25595	1.50759	0.91001	525.595	910.01
52.8	5.75085	0.38097	5.26562	1.51036	0.90708	526.562	907.08
52.9	5.76176	0.38364	5.27652	1.51349	0.91342	527.652	913.42
53	5.77145	0.38369	5.28622	1.51627	0.91355	528.622	913.55
53.1	5.78128	0.38591	5.29605	1.51909	0.91883	529.605	918.83
53.2	5.79166	0.38588	5.30642	1.52206	0.91877	530.642	918.77
53.3	5.8014	0.38934	5.31617	1.52486	0.92701	531.617	927.01
53.4	5.81143	0.38854	5.3262	1.52774	0.9251	532.62	925.1
53.5	5.82139	0.38908	5.33616	1.53059	0.92637	533.616	926.37
53.6	5.83159	0.38962	5.34635	1.53352	0.92766	534.635	927.66
53.7	5.842	0.39074	5.35676	1.5365	0.93033	535.676	930.33
53.8	5.85113	0.39175	5.36589	1.53912	0.93275	536.589	932.75
53.9	5.86151	0.39209	5.37628	1.5421	0.93355	537.628	933.55
54	5.87172	0.39205	5.38648	1.54503	0.93344	538.648	933.44
54.1	5.88096	0.3944	5.39573	1.54768	0.93904	539.573	939.04
54.2	5.89203	0.39528	5.40679	1.55085	0.94114	540.679	941.14
54.3	5.90186	0.39548	5.41662	1.55367	0.94163	541.662	941.63
54.4	5.91086	0.3977	5.42562	1.55625	0.94691	542.562	946.91
54.5	5.92154	0.39812	5.4363	1.55932	0.94791	543.63	947.91
54.6	5.93155	0.3988	5.44631	1.56219	0.94953	544.631	949.53
54.7	5.94138	0.40176	5.45614	1.56501	0.95657	545.614	956.57
54.8	5.95164	0.40092	5.4664	1.56795	0.95458	546.64	954.58
54.9	5.96149	0.40003	5.47626	1.57078	0.95246	547.626	952.46
55	5.97181	0.40222	5.48657	1.57374	0.95767	548.657	957.67
55.1	5.9812	0.40353	5.49596	1.57643	0.96079	549.596	960.79
55.2	5.99133	0.40352	5.5061	1.57934	0.96076	550.61	960.76
55.3	6.00229	0.40705	5.51705	1.58248	0.96916	551.705	969.16
55.4	6.01123	0.40524	5.526	1.58505	0.96486	552.6	964.86
55.5	6.02093	0.40836	5.5357	1.58783	0.9723	553.57	972.3
55.6	6.03191	0.40961	5.54667	1.59098	0.97527	554.667	975.27
55.7	6.04113	0.40936	5.55589	1.59362	0.97466	555.589	974.66
55.8	6.05112	0.41063	5.56589	1.59649	0.97768	556.589	977.68
55.9	6.06186	0.41409	5.57663	1.59957	0.98592	557.663	985.92
56	6.0713	0.41137	5.58606	1.60227	0.97946	558.606	979.46
56.1	6.08087	0.41423	5.59564	1.60502	0.98626	559.564	986.26
56.2	6.09155	0.41483	5.60631	1.60808	0.98769	560.631	987.69
56.3	6.10152	0.41457	5.61628	1.61094	0.98707	561.628	987.07
56.4	6.11154	0.41643	5.6263	1.61382	0.99149	562.63	991.49
56.5	6.12145	0.41663	5.63622	1.61666	0.99198	563.622	991.98
56.6	6.13143	0.41833	5.64619	1.61952	0.99602	564.619	996.02
56.7	6.14176	0.41998	5.65653	1.62249	0.99996	565.653	999.96
56.8	6.15109	0.42031	5.66585	1.62516	1.00074	566.585	1000.74
56.9	6.16187	0.42034	5.67663	1.62825	1.00081	567.663	1000.81
57	6.1719	0.42293	5.68666	1.63113	1.00697	568.666	1006.97
57.1	6.18081	0.42468	5.69557	1.63368	1.01115	569.557	1011.15
57.2	6.1917	0.42563	5.70647	1.63681	1.0134	570.647	1013.4
57.3	6.20178	0.42481	5.71654	1.6397	1.01145	571.654	1011.45
57.4	6.2109	0.42557	5.72567	1.64232	1.01327	572.567	1013.27
57.5	6.22187	0.42669	5.73664	1.64546	1.01593	573.664	1015.93
57.6	6.23169	0.42841	5.74646	1.64828	1.02003	574.646	1020.03
57.7	6.24137	0.43057	5.75613	1.65105	1.02517	575.613	1025.17
57.8	6.25136	0.42951	5.76613	1.65392	1.02264	576.613	1022.64
57.9	6.26162	0.4321	5.77639	1.65687	1.02881	577.639	1028.81
58	6.27207	0.43035	5.78683	1.65986	1.02464	578.683	1024.64
58.1	6.28134	0.43249	5.79611	1.66252	1.02973	579.611	1029.73
58.2	6.29133	0.43316	5.80609	1.66539	1.03133	580.609	1031.33
58.3	6.30197	0.4347	5.81673	1.66844	1.03499	581.673	1034.99
58.4	6.31117	0.43629	5.82593	1.67108	1.03879	582.593	1038.79
58.5	6.32107	0.43805	5.83584	1.67392	1.04298	583.584	1042.98
58.6	6.3322	0.43847	5.84696	1.67711	1.04398	584.696	1043.98
58.7	6.34134	0.44073	5.85611	1.67973	1.04935	585.611	1049.35
58.8	6.35087	0.44011	5.86563	1.68246	1.04788	586.563	1047.88
58.9	6.36158	0.44027	5.87635	1.68554	1.04826	587.635	1048.26
59	6.37153	0.44104	5.88629	1.68839	1.0501	588.629	1050.1
59.1	6.3815	0.44307	5.89627	1.69125	1.05492	589.627	1054.92
59.2	6.39158	0.44674	5.90635	1.69414	1.06366	590.635	1063.66
59.3	6.40136	0.44413	5.91612	1.69695	1.05745	591.612	1057.45
59.4	6.41152	0.44619	5.92628	1.69986	1.06236	592.628	1062.36
59.5	6.4213	0.44611	5.93607	1.70267	1.06216	593.607	1062.16
59.6	6.43148	0.44821	5.94624	1.70559	1.06718	594.624	1067.18
59.7	6.44205	0.44945	5.95682	1.70862	1.07013	595.682	1070.13
59.8	6.45113	0.45032	5.96589	1.71122	1.07219	596.589	1072.19
59.9	6.46144	0.45157	5.97621	1.71418	1.07518	597.621	1075.18
60	6.47166	0.45342	5.98643	1.71711	1.07958	598.643	1079.58
60.1	6.4812	0.45323	5.99597	1.71985	1.07911	599.597	1079.11
60.2	6.49195	0.45448	6.00671	1.72293	1.0821	600.671	1082.1
60.3	6.50172	0.45435	6.01649	1.72573	1.08179	601.649	1081.79
60.4	6.51128	0.45745	6.02605	1.72848	1.08917	602.605	1089.17
60.5	6.52154	0.45892	6.03631	1.73142	1.09267	603.631	1092.67
60.6	6.53147	0.459	6.04624	1.73427	1.09285	604.624	1092.85
60.7	6.54147	0.46031	6.05623	1.73713	1.09598	605.623	1095.98
60.8	6.55196	0.46064	6.06672	1.74014	1.09676	606.672	1096.76
60.9	6.56129	0.46225	6.07606	1.74282	1.10059	607.606	1100.59
61	6.57111	0.46492	6.08588	1.74564	1.10695	608.588	1106.95
61.1	6.58073	0.46679	6.09549	1.74839	1.1114	609.549	1111.4
61.2	6.59093	0.46518	6.10569	1.75132	1.10757	610.569	1107.57
61.3	6.60221	0.4665	6.11697	1.75456	1.1107	611.697	1110.7
61.4	6.61155	0.46714	6.12631	1.75724	1.11223	612.631	1112.23
61.5	6.62096	0.47051	6.13573	1.75994	1.12027	613.573	1120.27
61.6	6.63166	0.47268	6.14642	1.763	1.12542	614.642	1125.42
61.7	6.6414	0.47266	6.15617	1.7658	1.12538	615.617	1125.38
61.8	6.65106	0.47269	6.16582	1.76857	1.12545	616.582	1125.45
61.9	6.66181	0.4755	6.17657	1.77165	1.13214	617.657	1132.14
62	6.67129	0.4752	6.18605	1.77437	1.13143	618.605	1131.43
62.1	6.68117	0.4755	6.19593	1.7772	1.13215	619.593	1132.15
62.2	6.69153	0.47889	6.20629	1.78018	1.14022	620.629	1140.22
62.3	6.70139	0.47852	6.21615	1.783	1.13933	621.615	1139.33
62.4	6.71169	0.47928	6.22646	1.78596	1.14115	622.646	1141.15
62.5	6.72141	0.48067	6.23617	1.78875	1.14445	623.617	1144.45
62.6	6.7314	0.48203	6.24617	1.79161	1.14768	624.617	1147.68
62.7	6.74164	0.48526	6.25641	1.79455	1.15539	625.641	1155.39
62.8	6.75127	0.48373	6.26604	1.79731	1.15174	626.604	1151.74
62.9	6.76179	0.48655	6.27655	1.80033	1.15845	627.655	1158.45
63	6.77197	0.48701	6.28673	1.80325	1.15956	628.673	1159.56
63.1	6.78089	0.48692	6.29565	1.80581	1.15933	629.565	1159.33
63.2	6.79174	0.48735	6.30651	1.80892	1.16036	630.651	1160.36
63.3	6.80168	0.49061	6.31645	1.81177	1.16812	631.645	1168.12
63.4	6.81092	0.48982	6.32569	1.81442	1.16623	632.569	1166.23
63.5	6.82208	0.49221	6.33685	1.81762	1.17194	633.685	1171.94
63.6	6.83186	0.49331	6.34662	1.82043	1.17454	634.662	1174.54
63.7	6.84109	0.49316	6.35585	1.82308	1.1742	635.585	1174.2
63.8	6.8514	0.49502	6.36616	1.82603	1.17862	636.616	1178.62
63.9	6.86163	0.49726	6.3764	1.82897	1.18396	637.64	1183.96
64	6.87202	0.49695	6.38679	1.83195	1.18322	638.679	1183.22
64.1	6.88135	0.49902	6.39612	1.83463	1.18813	639.612	1188.13
64.2	6.89129	0.50132	6.40606	1.83748	1.19361	640.606	1193.61
64.3	6.90196	0.5011	6.41673	1.84054	1.1931	641.673	1193.1
64.4	6.91095	0.50464	6.42572	1.84312	1.20152	642.572	1201.52
64.5	6.92097	0.5037	6.43574	1.84599	1.19929	643.574	1199.29
64.6	6.93231	0.50556	6.44708	1.84924	1.20372	644.708	1203.72
64.7	6.94119	0.50729	6.45595	1.85179	1.20783	645.595	1207.83
64.8	6.95092	0.50783	6.46569	1.85458	1.20913	646.569	1209.13
64.9	6.96179	0.50999	6.47655	1.8577	1.21427	647.655	1214.27
65	6.9715	0.51174	6.48626	1.86048	1.21843	648.626	1218.43
65.1	6.98125	0.51127	6.49601	1.86328	1.21731	649.601	1217.31
65.2	6.99163	0.51453	6.5064	1.86626	1.22507	650.64	1225.07
65.3	7.00151	0.51578	6.51627	1.86909	1.22806	651.627	1228.06
65.4	7.01128	0.51574	6.52604	1.87189	1.22795	652.604	1227.95
65.5	7.02125	0.51701	6.53601	1.87475	1.23097	653.601	1230.97
65.6	7.03165	0.5182	6.54642	1.87774	1.2338	654.642	1233.8
65.7	7.04184	0.51811	6.55661	1.88066	1.2336	655.661	1233.6
65.8	7.05105	0.52183	6.56582	1.8833	1.24246	656.582	1242.46
65.9	7.06154	0.52152	6.57631	1.88631	1.24171	657.631	1241.71
66	7.07179	0.52313	6.58655	1.88925	1.24556	658.655	1245.56
66.1	7.0809	0.52553	6.59566	1.89186	1.25126	659.566	1251.26
66.2	7.09211	0.526	6.60687	1.89508	1.25238	660.687	1252.38
66.3	7.10184	0.52821	6.61661	1.89787	1.25763	661.661	1257.63
66.4	7.11082	0.52933	6.62559	1.90044	1.26031	662.559	1260.31
66.5	7.12156	0.52974	6.63633	1.90353	1.26128	663.633	1261.28
66.6	7.13171	0.53081	6.64647	1.90644	1.26384	664.647	1263.84
66.7	7.14137	0.53316	6.65613	1.90921	1.26942	665.613	1269.42
66.8	7.15166	0.53398	6.66642	1.91216	1.27139	666.642	1271.39
66.9	7.1615	0.5372	6.67626	1.91498	1.27904	667.626	1279.04
67	7.17177	0.5374	6.68654	1.91793	1.27951	668.654	1279.51
67.1	7.18111	0.53774	6.69588	1.92061	1.28034	669.588	1280.34
67.2	7.19133	0.53905	6.70609	1.92354	1.28345	670.609	1283.45
67.3	7.20225	0.54022	6.71701	1.92667	1.28623	671.701	1286.23
67.4	7.21125	0.54254	6.72602	1.92925	1.29175	672.602	1291.75
67.5	7.22095	0.5421	6.73572	1.93203	1.29071	673.572	1290.71
67.6	7.23187	0.54574	6.74663	1.93517	1.29938	674.663	1299.38
67.7	7.24125	0.54687	6.75601	1.93786	1.30206	675.601	1302.06
67.8	7.25102	0.54853	6.76578	1.94066	1.30601	676.578	1306.01
67.9	7.26187	0.54765	6.77664	1.94377	1.30393	677.664	1303.93
68	7.27135	0.55126	6.78611	1.94649	1.31252	678.611	1312.52
68.1	7.28103	0.55054	6.79579	1.94927	1.31081	679.579	1310.81
68.2	7.29152	0.55128	6.80628	1.95227	1.31258	680.628	1312.58
68.3	7.30149	0.55463	6.81625	1.95513	1.32054	681.625	1320.54
68.4	7.31155	0.55735	6.82632	1.95802	1.32702	682.632	1327.02
68.5	7.32124	0.55861	6.836	1.9608	1.33002	683.6	1330.02
68.6	7.33149	0.55934	6.84625	1.96374	1.33176	684.625	1331.76
68.7	7.3417	0.56158	6.85647	1.96667	1.33709	685.647	1337.09
68.8	7.35109	0.5606	6.86585	1.96936	1.33476	686.585	1334.76
68.9	7.36181	0.56479	6.87658	1.97244	1.34474	687.658	1344.74
69	7.37199	0.56444	6.88676	1.97536	1.3439	688.676	1343.9
69.1	7.38087	0.56791	6.89564	1.9779	1.35217	689.564	1352.17
69.2	7.3918	0.56581	6.90656	1.98104	1.34716	690.656	1347.16
69.3	7.40179	0.57044	6.91656	1.9839	1.35818	691.656	1358.18
69.4	7.41086	0.57023	6.92563	1.98651	1.35768	692.563	1357.68
69.5	7.42186	0.57275	6.93663	1.98966	1.3637	693.663	1363.7
69.6	7.43173	0.57382	6.94649	1.99249	1.36623	694.649	1366.23
69.7	7.44123	0.57573	6.95599	1.99522	1.37079	695.599	1370.79
69.8	7.45144	0.57558	6.96621	1.99815	1.37042	696.621	1370.42
69.9	7.46168	0.57685	6.97645	2.00108	1.37346	697.645	1373.46
70	7.47198	0.58073	6.98674	2.00404	1.38269	698.674	1382.69
70.1	7.48136	0.57981	6.99613	2.00673	1.38049	699.613	1380.49
70.2	7.49129	0.58209	7.00606	2.00958	1.38593	700.606	1385.93
70.3	7.50196	0.5836	7.01672	2.01264	1.38952	701.672	1389.52
70.4	7.51102	0.5873	7.02579	2.01524	1.39834	702.579	1398.34
70.5	7.52114	0.58497	7.0359	2.01814	1.39279	703.59	1392.79
70.6	7.53216	0.58876	7.04693	2.0213	1.4018	704.693	1401.8
70.7	7.54102	0.58891	7.05578	2.02384	1.40217	705.578	1402.17
70.8	7.55083	0.59019	7.0656	2.02665	1.40522	706.56	1405.22
70.9	7.5618	0.59314	7.07657	2.0298	1.41223	707.657	1412.23
71	7.57142	0.59358	7.08618	2.03256	1.41328	708.618	1413.28
71.1	7.58119	0.59313	7.09596	2.03536	1.41221	709.596	1412.21
71.2	7.59166	0.59575	7.10643	2.03837	1.41845	710.643	1418.45
71.3	7.60139	0.5987	7.11615	2.04116	1.42549	711.615	1425.49
71.4	7.61117	0.59883	7.12594	2.04396	1.42578	712.594	1425.78
71.5	7.62132	0.60139	7.13609	2.04687	1.43187	713.609	1431.87
71.6	7.63166	0.60205	7.14642	2.04984	1.43344	714.642	1433.44
71.7	7.64188	0.60389	7.15664	2.05277	1.43784	715.664	1437.84
71.8	7.65105	0.60568	7.16581	2.0554	1.4421	716.581	1442.1
71.9	7.66174	0.60867	7.17651	2.05847	1.44921	717.651	1449.21
72	7.67183	0.60771	7.18659	2.06136	1.44693	718.659	1446.93
72.1	7.68095	0.60973	7.19572	2.06398	1.45174	719.572	1451.74
72.2	7.69196	0.61165	7.20673	2.06714	1.45632	720.673	1456.32
72.3	7.70192	0.61158	7.21669	2.06999	1.45613	721.669	1456.13
72.4	7.71079	0.61578	7.22555	2.07254	1.46615	722.555	1466.15
72.5	7.72152	0.61549	7.23628	2.07561	1.46546	723.628	1465.46
72.6	7.73162	0.61987	7.24638	2.07851	1.47587	724.638	1475.87
72.7	7.74136	0.62184	7.25612	2.0813	1.48058	725.612	1480.58
72.8	7.75174	0.62052	7.26651	2.08428	1.47743	726.651	1477.43
72.9	7.76158	0.62396	7.27634	2.0871	1.48562	727.634	1485.62
73	7.77178	0.62452	7.28654	2.09003	1.48696	728.654	1486.96
73.1	7.78113	0.62602	7.29589	2.09271	1.49053	729.589	1490.53
73.2	7.79132	0.62695	7.30609	2.09564	1.49274	730.609	1492.74
73.3	7.80218	0.63132	7.31694	2.09875	1.50314	731.694	1503.14
73.4	7.8111	0.62768	7.32586	2.10131	1.49447	732.586	1494.47
73.5	7.82092	0.63052	7.33569	2.10413	1.50124	733.569	1501.24
73.6	7.83184	0.63421	7.34661	2.10726	1.51002	734.661	1510.02
73.7	7.84126	0.63468	7.35603	2.10996	1.51114	735.603	1511.14
73.8	7.85101	0.6353	7.36577	2.11276	1.51263	736.577	1512.63
73.9	7.8619	0.6383	7.37667	2.11588	1.51976	737.667	1519.76
74	7.87135	0.6378	7.38611	2.11859	1.51858	738.611	1518.58
74.1	7.88104	0.63956	7.3958	2.12137	1.52275	739.58	1522.75
74.2	7.89154	0.64394	7.4063	2.12438	1.5332	740.63	1533.2
74.3	7.90147	0.64262	7.41623	2.12723	1.53005	741.623	1530.05
74.4	7.9116	0.64724	7.42637	2.13014	1.54105	742.637	1541.05
74.5	7.92138	0.64552	7.43615	2.13294	1.53696	743.615	1536.96
74.6	7.93151	0.64769	7.44627	2.13585	1.54211	744.627	1542.11
74.7	7.94166	0.64823	7.45643	2.13876	1.5434	745.643	1543.4
74.8	7.95107	0.65	7.46583	2.14146	1.54762	746.583	1547.62
74.9	7.96178	0.65109	7.47654	2.14453	1.55022	747.654	1550.22
75	7.97205	0.65418	7.48681	2.14747	1.55757	748.681	1557.57
75.1	7.98089	0.65501	7.49566	2.15001	1.55955	749.566	1559.55
75.2	7.99176	0.65642	7.50653	2.15313	1.5629	750.653	1562.9
75.3	8.00173	0.65588	7.5165	2.15599	1.56163	751.65	1561.63
75.4	8.01111	0.65981	7.52587	2.15868	1.57099	752.587	1570.99
75.5	8.0217	0.66129	7.53647	2.16172	1.57449	753.647	1574.49
75.6	8.03148	0.66155	7.54624	2.16452	1.57512	754.624	1575.12
75.7	8.0412	0.66289	7.55597	2.16731	1.57831	755.597	1578.31
75.8	8.05142	0.66481	7.56618	2.17024	1.58289	756.618	1582.89
75.9	8.06163	0.6649	7.5764	2.17317	1.5831	757.64	1583.1
76	8.07203	0.66744	7.5868	2.17615	1.58914	758.68	1589.14
76.1	8.08144	0.66785	7.5962	2.17885	1.59013	759.62	1590.13
76.2	8.09134	0.66877	7.6061	2.18169	1.59232	760.61	1592.32
76.3	8.10186	0.67285	7.61663	2.18471	1.60203	761.663	1602.03
76.4	8.11117	0.67337	7.62594	2.18738	1.60326	762.594	1603.26
76.5	8.12116	0.67431	7.63593	2.19024	1.6055	763.593	1605.5
76.6	8.13223	0.67314	7.64699	2.19342	1.60273	764.699	1602.73
76.7	8.14129	0.6793	7.65605	2.19602	1.61739	765.605	1617.39
76.8	8.15083	0.67874	7.66559	2.19875	1.61604	766.559	1616.04
76.9	8.16148	0.6814	7.67624	2.20181	1.62237	767.624	1622.37
77	8.17136	0.68132	7.68612	2.20464	1.62218	768.612	1622.18
77.1	8.18142	0.68417	7.69618	2.20753	1.62898	769.618	1628.98
77.2	8.19165	0.68539	7.70642	2.21046	1.63188	770.642	1631.88
77.3	8.20134	0.68729	7.71611	2.21324	1.6364	771.611	1636.4
77.4	8.21129	0.68857	7.72606	2.2161	1.63944	772.606	1639.44
77.5	8.22129	0.68984	7.73605	2.21896	1.64248	773.605	1642.48
77.6	8.23152	0.69175	7.74629	2.2219	1.64703	774.629	1647.03
77.7	8.24205	0.6934	7.75682	2.22492	1.65094	775.682	1650.94
77.8	8.25112	0.69656	7.76588	2.22752	1.65847	776.588	1658.47
77.9	8.26146	0.69616	7.77623	2.23049	1.65753	777.623	1657.53
78	8.27174	0.69763	7.7865	2.23344	1.66101	778.65	1661.01
78.1	8.2809	0.69921	7.79566	2.23606	1.66478	779.566	1664.78
78.2	8.29203	0.70094	7.80679	2.23925	1.6689	780.679	1668.9
78.3	8.30181	0.70237	7.81657	2.24206	1.67232	781.657	1672.32
78.4	8.31102	0.70416	7.82579	2.2447	1.67658	782.579	1676.58
78.5	8.3216	0.70592	7.83637	2.24774	1.68076	783.637	1680.76
78.6	8.33151	0.70787	7.84628	2.25058	1.68541	784.628	1685.41
78.7	8.34157	0.70809	7.85634	2.25347	1.68593	785.634	1685.93
78.8	8.3518	0.71179	7.86656	2.2564	1.69474	786.656	1694.74
78.9	8.36151	0.71369	7.87627	2.25918	1.69926	787.627	1699.26
79	8.37173	0.7157	7.88649	2.26212	1.70406	788.649	1704.06
79.1	8.38125	0.71776	7.89602	2.26485	1.70895	789.602	1708.95
79.2	8.39112	0.7172	7.90588	2.26768	1.70761	790.588	1707.61
79.3	8.40205	0.7194	7.91681	2.27081	1.71287	791.681	1712.87
79.4	8.41133	0.72008	7.9261	2.27348	1.71448	792.61	1714.48
79.5	8.42098	0.7218	7.93575	2.27624	1.71857	793.575	1718.57
79.6	8.43176	0.72465	7.94652	2.27933	1.72537	794.652	1725.37
79.7	8.44117	0.7272	7.95594	2.28203	1.73142	795.594	1731.42
79.8	8.45098	0.72878	7.96575	2.28485	1.73519	796.575	1735.19
79.9	8.46177	0.72969	7.97654	2.28794	1.73737	797.654	1737.37
80	8.47125	0.73305	7.98601	2.29066	1.74535	798.601	1745.35
80.1	8.48108	0.73147	7.99584	2.29348	1.74159	799.584	1741.59
80.2	8.49149	0.73508	8.00625	2.29647	1.7502	800.625	1750.2
80.3	8.50144	0.735	8.0162	2.29932	1.75001	801.62	1750.01
80.4	8.51168	0.73675	8.02645	2.30226	1.75417	802.645	1754.17
80.5	8.52134	0.73896	8.03611	2.30503	1.75944	803.611	1759.44
80.6	8.53141	0.74093	8.04617	2.30792	1.76412	804.617	1764.12
80.7	8.54171	0.74094	8.05648	2.31087	1.76414	805.648	1764.14
80.8	8.55117	0.74257	8.06594	2.31359	1.76803	806.594	1768.03
80.9	8.56171	0.7444	8.07647	2.31661	1.77238	807.647	1772.38
81	8.57198	0.74545	8.08675	2.31956	1.77487	808.675	1774.87
81.1	8.58098	0.74672	8.09575	2.32214	1.7779	809.575	1777.9
81.2	8.59161	0.74902	8.10637	2.32518	1.78339	810.637	1783.39
81.3	8.6017	0.7503	8.11646	2.32808	1.78644	811.646	1786.44
81.4	8.611	0.75087	8.12577	2.33075	1.78779	812.577	1787.79
81.5	8.62193	0.75546	8.1367	2.33388	1.79872	813.67	1798.72
81.6	8.63165	0.75358	8.14641	2.33667	1.79423	814.641	1794.23
81.7	8.64126	0.75607	8.15602	2.33943	1.80017	815.602	1800.17
81.8	8.65147	0.75824	8.16623	2.34235	1.80533	816.623	1805.33
81.9	8.66163	0.75894	8.1764	2.34527	1.80699	817.64	1806.99
82	8.67198	0.76117	8.18674	2.34824	1.81232	818.674	1812.32
82.1	8.68133	0.76302	8.19609	2.35092	1.81671	819.609	1816.71
82.2	8.69126	0.76338	8.20602	2.35377	1.81758	820.602	1817.58
82.3	8.70183	0.76588	8.2166	2.3568	1.82352	821.66	1823.52
82.4	8.71117	0.76626	8.22594	2.35948	1.82443	822.594	1824.43
82.5	8.72107	0.76933	8.23583	2.36232	1.83173	823.583	1831.73
82.6	8.73209	0.76882	8.24685	2.36548	1.83051	824.685	1830.51
82.7	8.74121	0.77203	8.25597	2.36809	1.83817	825.597	1838.17
82.8	8.75074	0.77295	8.2655	2.37083	1.84037	826.55	1840.37
82.9	8.7617	0.77537	8.27646	2.37397	1.84611	827.646	1846.11
83	8.77143	0.77591	8.2862	2.37677	1.84741	828.62	1847.41
83.1	8.78132	0.77592	8.29609	2.3796	1.84744	829.609	1847.44
83.2	8.79171	0.78065	8.30647	2.38258	1.85869	830.647	1858.69
83.3	8.80142	0.77946	8.31619	2.38537	1.85585	831.619	1855.85
83.4	8.81141	0.78157	8.32618	2.38823	1.86087	832.618	1860.87
83.5	8.82129	0.78473	8.33605	2.39106	1.86841	833.605	1868.41
83.6	8.83153	0.78739	8.34629	2.394	1.87473	834.629	1874.73
83.7	8.84196	0.78688	8.35672	2.39699	1.87353	835.672	1873.53
83.8	8.85106	0.78851	8.36583	2.39961	1.87741	836.583	1877.41
83.9	8.86155	0.78932	8.37632	2.40261	1.87933	837.632	1879.33
84	8.87174	0.7918	8.3865	2.40553	1.88523	838.65	1885.23
84.1	8.88087	0.79379	8.39564	2.40816	1.88999	839.564	1889.99
84.2	8.89203	0.79443	8.40679	2.41135	1.8915	840.679	1891.5
84.3	8.90185	0.7979	8.41662	2.41417	1.89976	841.662	1899.76
84.4	8.91096	0.79729	8.42573	2.41679	1.89832	842.573	1898.32
84.5	8.92159	0.79918	8.43635	2.41983	1.90281	843.635	1902.81
84.6	8.93165	0.79942	8.44641	2.42272	1.90338	844.641	1903.38
84.7	8.94147	0.8024	8.45624	2.42554	1.91047	845.624	1910.47
84.8	8.95163	0.8043	8.46639	2.42845	1.91501	846.639	1915.01
84.9	8.96141	0.8042	8.47617	2.43126	1.91476	847.617	1914.76
85	8.97166	0.80762	8.48643	2.4342	1.92291	848.643	1922.91
85.1	8.98118	0.8065	8.49594	2.43693	1.92023	849.594	1920.23
85.2	8.99121	0.80986	8.50598	2.4398	1.92825	850.598	1928.25
85.3	9.00218	0.81208	8.51694	2.44295	1.93351	851.694	1933.51
85.4	9.01117	0.81352	8.52594	2.44553	1.93696	852.594	1936.96
85.5	9.02102	0.81529	8.53579	2.44836	1.94117	853.579	1941.17
85.6	9.03192	0.81635	8.54668	2.45148	1.9437	854.668	1943.7
85.7	9.04122	0.81924	8.55598	2.45415	1.95058	855.598	1950.58
85.8	9.05102	0.81966	8.56578	2.45696	1.95157	856.578	1951.57
85.9	9.06195	0.82088	8.57672	2.4601	1.95448	857.672	1954.48
86	9.07129	0.82542	8.58606	2.46278	1.96529	858.606	1965.29
86.1	9.08099	0.82407	8.59575	2.46555	1.96206	859.575	1962.06
86.2	9.09154	0.826	8.60631	2.46858	1.96668	860.631	1966.68
86.3	9.1015	0.82789	8.61627	2.47144	1.97116	861.627	1971.16
86.4	9.11138	0.82836	8.62614	2.47427	1.97228	862.614	1972.28
86.5	9.12129	0.82974	8.63605	2.47712	1.97558	863.605	1975.58
86.6	9.13147	0.83172	8.64624	2.48004	1.98028	864.624	1980.28
86.7	9.14163	0.83233	8.6564	2.48295	1.98174	865.64	1981.74
86.8	9.15104	0.83504	8.6658	2.48565	1.98819	866.58	1988.19
86.9	9.16193	0.83795	8.6767	2.48877	1.99511	867.67	1995.11
87	9.17199	0.84009	8.68675	2.49166	2.00021	868.675	2000.21
87.1	9.18079	0.84023	8.69555	2.49418	2.00055	869.555	2000.55
87.2	9.19173	0.84293	8.70649	2.49732	2.00698	870.649	2006.98
87.3	9.20179	0.84519	8.71655	2.5002	2.01237	871.655	2012.37
87.4	9.21084	0.8439	8.72561	2.5028	2.00929	872.561	2009.29
87.5	9.22195	0.84802	8.73671	2.50599	2.01911	873.671	2019.11
87.6	9.2318	0.85053	8.74657	2.50881	2.02507	874.657	2025.07
87.7	9.24105	0.85066	8.75581	2.51147	2.02539	875.581	2025.39
87.8	9.25129	0.85265	8.76605	2.5144	2.03011	876.605	2030.11
87.9	9.26171	0.85451	8.77648	2.51739	2.03455	877.648	2034.55
88	9.272	0.85431	8.78677	2.52034	2.03407	878.677	2034.07
88.1	9.28137	0.85795	8.79613	2.52303	2.04273	879.613	2042.73
88.2	9.29131	0.86018	8.80607	2.52588	2.04804	880.607	2048.04
88.3	9.30203	0.85918	8.8168	2.52896	2.04566	881.68	2045.66
88.4	9.31095	0.86184	8.82572	2.53152	2.052	882.572	2052
88.5	9.32102	0.86158	8.83578	2.5344	2.05137	883.578	2051.37
88.6	9.33243	0.8659	8.84719	2.53768	2.06168	884.719	2061.68
88.7	9.34113	0.86628	8.85589	2.54017	2.06256	885.589	2062.56
88.8	9.35079	0.86777	8.86556	2.54294	2.06611	886.556	2066.11
88.9	9.36182	0.86885	8.87659	2.54611	2.0687	887.659	2068.7
89	9.37137	0.87338	8.88613	2.54885	2.07947	888.613	2079.47
89.1	9.38118	0.87294	8.89594	2.55166	2.07842	889.594	2078.42
89.2	9.39168	0.87239	8.90645	2.55467	2.07713	890.645	2077.13
89.3	9.40158	0.87498	8.91635	2.55751	2.08329	891.635	2083.29
89.4	9.41116	0.87682	8.92593	2.56026	2.08766	892.593	2087.66
89.5	9.42123	0.87889	8.93599	2.56315	2.0926	893.599	2092.6
89.6	9.43191	0.87932	8.94667	2.56621	2.09363	894.667	2093.63
89.7	9.44193	0.87962	8.9567	2.56909	2.09433	895.67	2094.33
89.8	9.45107	0.8842	8.96584	2.57171	2.10524	896.584	2105.24
89.9	9.46147	0.88273	8.97624	2.57469	2.10173	897.624	2101.73
90	9.47157	0.88477	8.98633	2.57759	2.1066	898.633	2106.6
90.1	9.48073	0.88604	8.99549	2.58021	2.10961	899.549	2109.61
90.2	9.49211	0.88995	9.00688	2.58348	2.11893	900.688	2118.93
90.3	9.50207	0.89285	9.01684	2.58634	2.12582	901.684	2125.82
90.4	9.51084	0.8907	9.0256	2.58885	2.12072	902.56	2120.72
90.5	9.52162	0.89271	9.03638	2.59194	2.1255	903.638	2125.5
90.6	9.53187	0.89413	9.04663	2.59488	2.12887	904.663	2128.87
90.7	9.54119	0.89459	9.05595	2.59756	2.12999	905.595	2129.99
90.8	9.55154	0.89894	9.0663	2.60052	2.14034	906.63	2140.34
90.9	9.56169	0.89925	9.07646	2.60344	2.14106	907.646	2141.06
91	9.57176	0.90108	9.08652	2.60633	2.14542	908.652	2145.42
91.1	9.58109	0.90337	9.09585	2.609	2.15088	909.585	2150.88
91.2	9.59126	0.9036	9.10603	2.61192	2.15144	910.603	2151.44
91.3	9.6024	0.90469	9.11717	2.61511	2.15402	911.717	2154.02
91.4	9.61114	0.90686	9.1259	2.61762	2.15919	912.59	2159.19
91.5	9.6209	0.90732	9.13567	2.62042	2.1603	913.567	2160.3
91.6	9.6319	0.90885	9.14667	2.62358	2.16393	914.667	2163.93
91.7	9.6411	0.90991	9.15587	2.62622	2.16645	915.587	2166.45
91.8	9.65101	0.9128	9.16577	2.62906	2.17332	916.577	2173.32
91.9	9.66204	0.91707	9.1768	2.63222	2.18351	917.68	2183.51
92	9.67129	0.91656	9.18606	2.63488	2.18228	918.606	2182.28
92.1	9.68093	0.91608	9.19569	2.63764	2.18114	919.569	2181.14
92.2	9.69159	0.91892	9.20636	2.6407	2.18791	920.636	2187.91
92.3	9.70167	0.92114	9.21644	2.64359	2.19319	921.644	2193.19
92.4	9.71152	0.92217	9.22629	2.64641	2.19565	922.629	2195.65
92.5	9.7213	0.92519	9.23606	2.64922	2.20283	923.606	2202.83
92.6	9.73159	0.92742	9.24636	2.65217	2.20813	924.636	2208.13
92.7	9.74156	0.92587	9.25633	2.65503	2.20445	925.633	2204.45
92.8	9.75109	0.92932	9.26585	2.65776	2.21268	926.585	2212.68
92.9	9.76187	0.93148	9.27664	2.66086	2.21781	927.664	2217.81
93	9.77205	0.93258	9.28681	2.66377	2.22042	928.681	2220.42
93.1	9.78085	0.93398	9.29562	2.6663	2.22375	929.562	2223.75
93.2	9.7917	0.93517	9.30646	2.66941	2.22659	930.646	2226.59
93.3	9.80181	0.93751	9.31657	2.67231	2.23217	931.657	2232.17
93.4	9.8109	0.93928	9.32567	2.67492	2.23638	932.567	2236.38
93.5	9.82187	0.93992	9.33664	2.67807	2.2379	933.664	2237.9
93.6	9.83182	0.94159	9.34659	2.68092	2.24189	934.659	2241.89
93.7	9.84096	0.94333	9.35573	2.68354	2.24602	935.573	2246.02
93.8	9.85135	0.94516	9.36612	2.68652	2.25039	936.612	2250.39
93.9	9.86165	0.9457	9.37642	2.68948	2.25166	937.642	2251.66
94	9.87194	0.94886	9.3867	2.69243	2.25918	938.67	2259.18
94.1	9.8813	0.947	9.39607	2.69511	2.25476	939.607	2254.76
94.2	9.89132	0.95219	9.40609	2.69799	2.26713	940.609	2267.13
94.3	9.90203	0.95309	9.41679	2.70106	2.26926	941.679	2269.26
94.4	9.9111	0.95322	9.42586	2.70366	2.26957	942.586	2269.57
94.5	9.92108	0.95677	9.43584	2.70652	2.27802	943.584	2278.02
94.6	9.93232	0.95694	9.44709	2.70975	2.27843	944.709	2278.43
94.7	9.94116	0.95832	9.45592	2.71228	2.28173	945.592	2281.73
94.8	9.95078	0.96016	9.46554	2.71504	2.2861	946.554	2286.1
94.9	9.96184	0.96308	9.4766	2.71821	2.29304	947.66	2293.04
95	9.97149	0.96402	9.48626	2.72098	2.2953	948.626	2295.3
95.1	9.98121	0.96537	9.49597	2.72377	2.29851	949.597	2298.51
95.2	9.99161	0.9664	9.50637	2.72675	2.30095	950.637	2300.95
95.3	10.0016	0.96884	9.51633	2.72961	2.30677	951.633	2306.77
95.4	10.0112	0.97128	9.52601	2.73238	2.31257	952.601	2312.57
95.5	10.0213	0.97211	9.53612	2.73528	2.31454	953.612	2314.54
95.6	10.0319	0.97485	9.54666	2.73831	2.32108	954.666	2321.08
95.7	10.0418	0.97431	9.5566	2.74116	2.31978	955.66	2319.78
95.8	10.051	0.97445	9.56575	2.74379	2.32012	956.575	2320.12
95.9	10.0617	0.97966	9.57649	2.74687	2.33253	957.649	2332.53
96	10.0717	0.97946	9.58649	2.74973	2.33205	958.649	2332.05
96.1	10.0808	0.97934	9.59559	2.75234	2.33176	959.559	2331.76
96.2	10.092	0.98216	9.60673	2.75554	2.33849	960.673	2338.49
96.3	10.102	0.98328	9.61672	2.7584	2.34115	961.672	2341.15
96.4	10.1108	0.98492	9.62555	2.76094	2.34505	962.555	2345.05
96.5	10.1215	0.98851	9.63625	2.76401	2.3536	963.625	2353.6
96.6	10.1316	0.98952	9.6464	2.76692	2.35599	964.64	2355.99
96.7	10.1412	0.99095	9.65595	2.76966	2.3594	965.595	2359.4
96.8	10.1517	0.99311	9.66642	2.77266	2.36455	966.642	2364.55
96.9	10.1616	0.99346	9.67641	2.77552	2.36539	967.641	2365.39
97	10.1717	0.99349	9.68651	2.77842	2.36545	968.651	2365.45
97.1	10.1812	0.99713	9.69601	2.78115	2.37412	969.601	2374.12
97.2	10.1914	0.99656	9.70616	2.78406	2.37275	970.616	2372.75
97.3	10.2023	0.99701	9.71702	2.78717	2.37383	971.702	2373.83
97.4	10.2112	1.00051	9.72594	2.78973	2.38218	972.594	2382.18
97.5	10.221	1.0021	9.73573	2.79254	2.38595	973.573	2385.95
97.6	10.2319	1.00253	9.74663	2.79567	2.38697	974.663	2386.97
97.7	10.2413	1.00475	9.75602	2.79836	2.39226	975.602	2392.26
97.8	10.251	1.005	9.76575	2.80115	2.39285	976.575	2392.85
97.9	10.262	1.00738	9.77672	2.8043	2.39852	977.672	2398.52
98	10.2713	1.0104	9.7861	2.80699	2.40572	978.61	2405.72
98.1	10.2809	1.00896	9.79567	2.80973	2.40228	979.567	2402.28
98.2	10.2915	1.01347	9.80624	2.81277	2.41303	980.624	2413.03
98.3	10.3016	1.01307	9.81633	2.81566	2.41208	981.633	2412.08
98.4	10.3116	1.01535	9.82632	2.81852	2.41751	982.632	2417.51
98.5	10.3214	1.01711	9.83613	2.82134	2.42168	983.613	2421.68
98.6	10.3315	1.01997	9.84625	2.82424	2.4285	984.625	2428.5
98.7	10.3416	1.02065	9.85638	2.82715	2.43012	985.638	2430.12
98.8	10.3511	1.02122	9.86584	2.82986	2.43148	986.584	2431.48
98.9	10.3619	1.02191	9.87666	2.83296	2.43311	987.666	2433.11
99	10.372	1.02384	9.88677	2.83586	2.43772	988.677	2437.72
99.1	10.3808	1.02515	9.89553	2.83837	2.44084	989.553	2440.84
99.2	10.3915	1.02624	9.9063	2.84147	2.44344	990.63	2443.44
99.3	10.4019	1.02889	9.91664	2.84443	2.44974	991.664	2449.74
99.4	10.4109	1.02904	9.92566	2.84702	2.45008	992.566	2450.08
99.5	10.4219	1.03001	9.93663	2.85017	2.45241	993.663	2452.41
99.6	10.4317	1.0309	9.94645	2.85298	2.45452	994.645	2454.52
99.7	10.4413	1.03504	9.95604	2.85573	2.46437	995.604	2464.37
99.8	10.4514	1.03508	9.96619	2.85864	2.46448	996.619	2464.48
99.9	10.4617	1.03719	9.97644	2.86158	2.4695	997.644	2469.5
100	10.4719	1.03707	9.98669	2.86452	2.46921	998.669	2469.21
100.1	10.4813	1.04087	9.99606	2.86721	2.47826	999.606	2478.26
100.2	10.4913	1.03894	10.0061	2.87009	2.47368	1000.61	2473.68
100.3	10.5019	1.04204	10.0166	2.87311	2.48105	1001.66	2481.05
100.4	10.511	1.043	10.0258	2.87573	2.48334	1002.58	2483.34
100.5	10.5211	1.04456	10.0358	2.87862	2.48706	1003.58	2487.06
100.6	10.5323	1.04562	10.047	2.88183	2.48958	1004.7	2489.58
100.7	10.5412	1.04474	10.056	2.88439	2.48748	1005.6	2487.48
100.8	10.5509	1.04783	10.0656	2.88716	2.49484	1006.56	2494.84
100.9	10.5618	1.04888	10.0765	2.89029	2.49734	1007.65	2497.34
101	10.5715	1.05096	10.0863	2.89308	2.50228	1008.63	2502.28
101.1	10.5812	1.05347	10.0959	2.89586	2.50827	1009.59	2508.27
101.2	10.5917	1.05414	10.1064	2.89887	2.50986	1010.64	2509.86
101.3	10.6015	1.05346	10.1162	2.90168	2.50824	1011.62	2508.24
101.4	10.6113	1.05803	10.1261	2.90451	2.51912	1012.61	2519.12
101.5	10.6213	1.05808	10.136	2.90737	2.51925	1013.61	2519.25
101.6	10.6319	1.05963	10.1466	2.9104	2.52293	1014.66	2522.93
101.7	10.6418	1.05979	10.1566	2.91325	2.52331	1015.66	2523.31
101.8	10.651	1.06253	10.1658	2.91589	2.52983	1016.58	2529.83
101.9	10.6617	1.06506	10.1764	2.91895	2.53586	1017.64	2535.86
102	10.6718	1.06582	10.1865	2.92185	2.53767	1018.65	2537.67
102.1	10.6808	1.06648	10.1956	2.92445	2.53923	1019.56	2539.23
102.2	10.692	1.06837	10.2068	2.92765	2.54373	1020.68	2543.73
102.3	10.702	1.06962	10.2167	2.93051	2.54671	1021.67	2546.71
102.4	10.7108	1.07012	10.2256	2.93304	2.5479	1022.56	2547.9
102.5	10.7215	1.07209	10.2363	2.93612	2.5526	1023.63	2552.6
102.6	10.7317	1.07445	10.2464	2.93903	2.55821	1024.64	2558.21
102.7	10.7414	1.07526	10.2561	2.94182	2.56013	1025.62	2560.13
102.8	10.7517	1.07806	10.2665	2.94478	2.56681	1026.65	2566.81
102.9	10.7615	1.07748	10.2763	2.94759	2.56542	1027.63	2565.42
103	10.7718	1.07828	10.2865	2.95053	2.56734	1028.65	2567.34
103.1	10.7811	1.08052	10.2959	2.95322	2.57267	1029.59	2572.67
103.2	10.7912	1.0814	10.306	2.95611	2.57475	1030.6	2574.75
103.3	10.8022	1.08492	10.3169	2.95925	2.58315	1031.69	2583.15
103.4	10.8112	1.08756	10.326	2.96185	2.58943	1032.6	2589.43
103.5	10.821	1.0851	10.3358	2.96465	2.58357	1033.58	2583.57
103.6	10.8318	1.08755	10.3466	2.96775	2.5894	1034.66	2589.4
103.7	10.8413	1.09016	10.356	2.97047	2.59563	1035.61	2595.63
103.8	10.851	1.09225	10.3658	2.97327	2.60058	1036.58	2600.58
103.9	10.862	1.0921	10.3768	2.97641	2.60023	1037.68	2600.23
104	10.8713	1.09472	10.3861	2.97909	2.60647	1038.61	2606.47
104.1	10.881	1.09498	10.3958	2.98187	2.6071	1039.58	2607.1
104.2	10.8917	1.09599	10.4064	2.98492	2.6095	1040.64	2609.5
104.3	10.9015	1.09925	10.4163	2.98774	2.61726	1041.63	2617.26
104.4	10.9114	1.0995	10.4262	2.99058	2.61787	1042.62	2617.87
104.5	10.9211	1.10242	10.4359	2.99337	2.62481	1043.59	2624.81
104.6	10.9314	1.10199	10.4461	2.99631	2.62379	1044.62	2623.79
104.7	10.9416	1.10554	10.4564	2.99925	2.63225	1045.64	2632.25
104.8	10.9511	1.10696	10.4659	3.00197	2.63563	1046.59	2635.63
104.9	10.9619	1.10793	10.4766	3.00505	2.63792	1047.66	2637.92
105	10.9721	1.10899	10.4869	3.00799	2.64046	1048.68	2640.46
105.1	10.9808	1.10807	10.4955	3.01048	2.63827	1049.56	2638.27
105.2	10.9916	1.11199	10.5064	3.0136	2.6476	1050.64	2647.6
105.3	11.0018	1.11442	10.5166	3.01652	2.65339	1051.66	2653.39
105.4	11.011	1.11501	10.5258	3.01915	2.65479	1052.58	2654.79
105.5	11.0219	1.1146	10.5367	3.02229	2.65382	1053.67	2653.82
105.6	11.0318	1.11977	10.5466	3.02512	2.66613	1054.66	2666.13
105.7	11.0412	1.11682	10.556	3.02782	2.6591	1055.6	2659.1
105.8	11.0513	1.11942	10.5661	3.03071	2.66528	1056.61	2665.28
105.9	11.0615	1.12124	10.5763	3.03364	2.66963	1057.63	2669.63
106	11.0719	1.12419	10.5867	3.03662	2.67665	1058.67	2676.65
106.1	11.0814	1.12526	10.5961	3.03933	2.67918	1059.61	2679.18
106.2	11.0913	1.12578	10.6061	3.04218	2.68042	1060.61	2680.42
106.3	11.102	1.12564	10.6167	3.04525	2.6801	1061.67	2680.1
106.4	11.1111	1.12998	10.6259	3.04787	2.69044	1062.59	2690.44
106.5	11.1211	1.12893	10.6359	3.05074	2.68794	1063.59	2687.94
106.6	11.1323	1.1304	10.647	3.05394	2.69143	1064.7	2691.43
106.7	11.1412	1.13266	10.656	3.05651	2.69681	1065.6	2696.81
106.8	11.1509	1.13275	10.6656	3.05927	2.69703	1066.57	2697.03
106.9	11.1617	1.13463	10.6765	3.06238	2.70149	1067.65	2701.49
107	11.1714	1.13754	10.6861	3.06515	2.70844	1068.61	2708.44
107.1	11.1812	1.13903	10.696	3.06797	2.71197	1069.6	2711.97
107.2	11.1917	1.13781	10.7065	3.07098	2.70907	1070.64	2709.07
107.3	11.2014	1.14013	10.7162	3.07377	2.7146	1071.62	2714.6
107.4	11.2113	1.14057	10.7261	3.07661	2.71564	1072.61	2715.64
107.5	11.2212	1.14183	10.736	3.07945	2.71864	1073.6	2718.64
107.6	11.2316	1.14403	10.7464	3.08242	2.72388	1074.64	2723.88
107.7	11.2419	1.14384	10.7567	3.08538	2.72343	1075.67	2723.43
107.8	11.251	1.14574	10.7658	3.08799	2.72796	1076.58	2727.96
107.9	11.2616	1.1469	10.7763	3.09102	2.73071	1077.63	2730.71
108	11.2718	1.15191	10.7865	3.09394	2.74264	1078.65	2742.64
108.1	11.2809	1.15019	10.7957	3.09657	2.73855	1079.57	2738.55
108.2	11.292	1.15087	10.8068	3.09975	2.74017	1080.68	2740.17
108.3	11.3019	1.15078	10.8166	3.10258	2.73995	1081.66	2739.95
108.4	11.3109	1.15569	10.8257	3.10518	2.75163	1082.57	2751.63
108.5	11.3215	1.15594	10.8363	3.10821	2.75225	1083.63	2752.25
108.6	11.3316	1.15652	10.8464	3.11111	2.75363	1084.64	2753.63
108.7	11.3416	1.15638	10.8563	3.11396	2.75329	1085.63	2753.29
108.8	11.3517	1.16072	10.8664	3.11686	2.76361	1086.64	2763.61
108.9	11.3614	1.16206	10.8762	3.11967	2.7668	1087.62	2766.8
109	11.3718	1.16125	10.8865	3.12263	2.76487	1088.65	2764.87
109.1	11.3813	1.16476	10.8961	3.12536	2.77324	1089.61	2773.24
109.2	11.3913	1.16408	10.9061	3.12823	2.77162	1090.61	2771.62
109.3	11.4022	1.16667	10.9169	3.13136	2.77779	1091.69	2777.79
109.4	11.4112	1.16669	10.926	3.13394	2.77784	1092.6	2777.84
109.5	11.421	1.16828	10.9357	3.13674	2.78162	1093.57	2781.62
109.6	11.4317	1.1703	10.9465	3.13983	2.78644	1094.65	2786.44
109.7	11.4413	1.17127	10.9561	3.14257	2.78875	1095.61	2788.75
109.8	11.4511	1.17216	10.9658	3.14537	2.79086	1096.58	2790.86
109.9	11.4619	1.17359	10.9767	3.14849	2.79426	1097.67	2794.26
110	11.4713	1.17437	10.9861	3.15119	2.79613	1098.61	2796.13
110.1	11.481	1.17586	10.9958	3.15397	2.79968	1099.58	2799.68
110.2	11.4916	1.17735	11.0063	3.157	2.80322	1100.63	2803.22
110.3	11.5014	1.17833	11.0161	3.15981	2.80554	1101.61	2805.54
110.4	11.5116	1.18004	11.0263	3.16273	2.80961	1102.63	2809.61
110.5	11.5213	1.18083	11.036	3.16551	2.8115	1103.6	2811.5
110.6	11.5313	1.18147	11.0461	3.16839	2.81302	1104.61	2813.02
110.7	11.5419	1.18266	11.0566	3.17142	2.81585	1105.66	2815.85
110.8	11.5511	1.18457	11.0658	3.17406	2.82041	1106.58	2820.41
110.9	11.5617	1.18534	11.0765	3.17712	2.82225	1107.65	2822.25
111	11.5721	1.18879	11.0868	3.18008	2.83044	1108.68	2830.44
111.1	11.5809	1.189	11.0956	3.18261	2.83095	1109.56	2830.95
111.2	11.5917	1.19093	11.1064	3.18571	2.83556	1110.64	2835.56
111.3	11.6018	1.19031	11.1166	3.18861	2.83408	1111.66	2834.08
111.4	11.6111	1.19209	11.1259	3.19129	2.83831	1112.59	2838.31
111.5	11.6218	1.19531	11.1366	3.19436	2.84598	1113.66	2845.98
111.6	11.6315	1.19645	11.1463	3.19713	2.8487	1114.63	2848.7
111.7	11.6413	1.19737	11.1561	3.19994	2.85089	1115.61	2850.89
111.8	11.6514	1.1968	11.1662	3.20285	2.84952	1116.62	2849.52
111.9	11.6615	1.19877	11.1763	3.20574	2.85421	1117.63	2854.21
112	11.6721	1.20101	11.1868	3.20877	2.85954	1118.68	2859.54
112.1	11.6814	1.2024	11.1962	3.21145	2.86286	1119.62	2862.86
112.2	11.6913	1.2029	11.206	3.21427	2.86405	1120.6	2864.05
112.3	11.7019	1.20399	11.2166	3.21732	2.86664	1121.66	2866.64
112.4	11.7111	1.2051	11.2259	3.21997	2.8693	1122.59	2869.3
112.5	11.7211	1.20641	11.2359	3.22284	2.87239	1123.59	2872.39
112.6	11.7321	1.21073	11.2469	3.22598	2.8827	1124.69	2882.7
112.7	11.7413	1.20839	11.2561	3.22863	2.87712	1125.61	2877.12
112.8	11.7509	1.20998	11.2657	3.23138	2.8809	1126.57	2880.9
112.9	11.7616	1.2123	11.2764	3.23446	2.88643	1127.64	2886.43
113	11.7713	1.21293	11.2861	3.23724	2.88794	1128.61	2887.94
113.1	11.7813	1.21243	11.2961	3.2401	2.88675	1129.61	2886.75
113.2	11.7916	1.21621	11.3064	3.24305	2.89574	1130.64	2895.74
113.3	11.8014	1.21684	11.3162	3.24586	2.89723	1131.62	2897.23
113.4	11.8114	1.21975	11.3261	3.24872	2.90416	1132.61	2904.16
113.5	11.8213	1.21972	11.3361	3.25158	2.90409	1133.61	2904.09
113.6	11.8315	1.22133	11.3463	3.2545	2.90792	1134.63	2907.92
113.7	11.842	1.22158	11.3568	3.25751	2.90853	1135.68	2908.53
113.8	11.8511	1.2246	11.3659	3.26012	2.91572	1136.59	2915.72
113.9	11.8616	1.22378	11.3763	3.26312	2.91376	1137.63	2913.76
114	11.8718	1.22495	11.3865	3.26604	2.91655	1138.65	2916.55
114.1	11.881	1.22731	11.3957	3.26869	2.92216	1139.57	2922.16
114.2	11.8919	1.22803	11.4067	3.27183	2.92389	1140.67	2923.89
114.3	11.9017	1.23129	11.4165	3.27464	2.93164	1141.65	2931.64
114.4	11.9109	1.23074	11.4257	3.27729	2.93034	1142.57	2930.34
114.5	11.9216	1.23237	11.4363	3.28033	2.93423	1143.63	2934.23
114.6	11.9315	1.23494	11.4463	3.28319	2.94034	1144.63	2940.34
114.7	11.9415	1.2357	11.4563	3.28606	2.94214	1145.63	2942.14
114.8	11.9518	1.23474	11.4665	3.28899	2.93986	1146.65	2939.86
114.9	11.9613	1.23563	11.4761	3.29174	2.94197	1147.61	2941.97
115	11.9717	1.23893	11.4864	3.2947	2.94984	1148.64	2949.84
115.1	11.9813	1.24046	11.496	3.29746	2.95348	1149.6	2953.48
115.2	11.9913	1.24129	11.506	3.30033	2.95546	1150.6	2955.46
115.3	12.0022	1.24283	11.5169	3.30345	2.95912	1151.69	2959.12
115.4	12.0113	1.24487	11.5261	3.30608	2.96398	1152.61	2963.98
115.5	12.021	1.24488	11.5358	3.30886	2.964	1153.58	2964
115.6	12.0318	1.2472	11.5465	3.31194	2.96952	1154.65	2969.52
115.7	12.0413	1.2483	11.5561	3.31468	2.97215	1155.61	2972.15
115.8	12.0512	1.25129	11.566	3.31751	2.97926	1156.6	2979.26
115.9	12.0618	1.24928	11.5766	3.32056	2.97448	1157.66	2974.48
116	12.0712	1.25177	11.586	3.32326	2.9804	1158.6	2980.4
116.1	12.081	1.25167	11.5958	3.32606	2.98018	1159.58	2980.18
116.2	12.0915	1.2538	11.6063	3.32908	2.98524	1160.63	2985.24
116.3	12.1015	1.25613	11.6163	3.33194	2.99078	1161.63	2990.78
116.4	12.1116	1.25649	11.6264	3.33485	2.99165	1162.64	2991.65
116.5	12.1213	1.25675	11.6361	3.33762	2.99227	1163.61	2992.27
116.6	12.1314	1.25793	11.6462	3.34053	2.99507	1164.62	2995.07
116.7	12.1417	1.25983	11.6564	3.34347	2.9996	1165.64	2999.6
116.8	12.1511	1.25888	11.6659	3.34616	2.99733	1166.59	2997.33
116.9	12.1618	1.26171	11.6766	3.34925	3.00408	1167.66	3004.08
117	12.172	1.26124	11.6868	3.35218	3.00296	1168.68	3002.96
117.1	12.1809	1.26144	11.6956	3.35471	3.00343	1169.56	3003.43
117.2	12.1916	1.26284	11.7064	3.35778	3.00677	1170.64	3006.77
117.3	12.2017	1.26521	11.7164	3.36068	3.0124	1171.64	3012.4
117.4	12.211	1.26533	11.7258	3.36335	3.01268	1172.58	3012.68
117.5	12.2219	1.2686	11.7367	3.36649	3.02047	1173.67	3020.47
117.6	12.2317	1.26827	11.7465	3.36929	3.01968	1174.65	3019.68
117.7	12.2412	1.26745	11.756	3.37202	3.01773	1175.6	3017.73
117.8	12.2515	1.27107	11.7662	3.37495	3.02637	1176.62	3026.37
117.9	12.2615	1.27096	11.7763	3.37785	3.0261	1177.63	3026.1
118	12.2721	1.27414	11.7868	3.38087	3.03366	1178.68	3033.66
118.1	12.2814	1.27393	11.7962	3.38355	3.03316	1179.62	3033.16
118.2	12.2913	1.27628	11.8061	3.38639	3.03875	1180.61	3038.75
118.3	12.3019	1.27611	11.8166	3.38942	3.03836	1181.66	3038.36
118.4	12.3111	1.27952	11.8259	3.39207	3.04646	1182.59	3046.46
118.5	12.3211	1.28093	11.8359	3.39494	3.04984	1183.59	3049.84
118.6	12.3323	1.28119	11.8471	3.39815	3.05044	1184.71	3050.44
118.7	12.3412	1.27957	11.856	3.40071	3.04661	1185.6	3046.61
118.8	12.3507	1.2819	11.8655	3.40343	3.05215	1186.55	3052.15
118.9	12.3613	1.28472	11.876	3.40645	3.05887	1187.6	3058.87
119	12.3713	1.28535	11.886	3.40932	3.06037	1188.6	3060.37
119.1	12.3814	1.28558	11.8961	3.41221	3.0609	1189.61	3060.9
119.2	12.3918	1.28791	11.9065	3.41521	3.06646	1190.65	3066.46
119.3	12.4015	1.2877	11.9162	3.41798	3.06594	1191.62	3065.94
119.4	12.4113	1.28867	11.9261	3.4208	3.06827	1192.61	3068.27
119.5	12.4212	1.29124	11.936	3.42365	3.07438	1193.6	3074.38
119.6	12.4316	1.29075	11.9464	3.42662	3.07322	1194.64	3073.22
119.7	12.4421	1.29281	11.9568	3.42963	3.07812	1195.68	3078.12
119.8	12.4511	1.29218	11.9659	3.43223	3.07662	1196.59	3076.62
119.9	12.4615	1.29396	11.9763	3.43521	3.08086	1197.63	3080.86
120	12.4717	1.29627	11.9865	3.43814	3.08635	1198.65	3086.35
120.1	12.4808	1.29684	11.9956	3.44074	3.08771	1199.56	3087.71
120.2	12.4921	1.30035	12.0068	3.44396	3.09607	1200.68	3096.07
120.3	12.5019	1.29873	12.0167	3.44679	3.09222	1201.66	3092.22
120.4	12.511	1.30077	12.0258	3.44941	3.09707	1202.58	3097.07
120.5	12.5216	1.30251	12.0364	3.45245	3.10121	1203.64	3101.21
120.6	12.5316	1.3043	12.0464	3.45531	3.10547	1204.64	3105.47
120.7	12.5414	1.3019	12.0561	3.45811	3.09975	1205.61	3099.75
120.8	12.5518	1.30484	12.0665	3.46109	3.10676	1206.65	3106.76
120.9	12.5614	1.30599	12.0762	3.46387	3.10949	1207.62	3109.49
121	12.5717	1.30803	12.0864	3.4668	3.11436	1208.64	3114.36
121.1	12.5813	1.30692	12.096	3.46955	3.11172	1209.6	3111.72
121.2	12.5913	1.3105	12.1061	3.47244	3.12025	1210.61	3120.25
121.3	12.6021	1.30992	12.1169	3.47554	3.11887	1211.69	3118.87
121.4	12.6112	1.31091	12.126	3.47815	3.12121	1212.6	3121.21
121.5	12.6209	1.31048	12.1356	3.48092	3.1202	1213.56	3120.2
121.6	12.6317	1.31415	12.1464	3.48401	3.12892	1214.64	3128.92
121.7	12.6413	1.31414	12.1561	3.48677	3.12891	1215.61	3128.91
121.8	12.6511	1.31526	12.1658	3.48957	3.13157	1216.58	3131.57
121.9	12.6619	1.31555	12.1766	3.49268	3.13225	1217.66	3132.25
122	12.6713	1.31718	12.1861	3.49538	3.13614	1218.61	3136.14
122.1	12.6811	1.31716	12.1959	3.49819	3.13609	1219.59	3136.09
122.2	12.6916	1.31886	12.2064	3.50121	3.14015	1220.64	3140.15
122.3	12.7015	1.32198	12.2162	3.50403	3.14756	1221.62	3147.56
122.4	12.7116	1.32084	12.2263	3.50693	3.14486	1222.63	3144.86
122.5	12.7214	1.32304	12.2362	3.50975	3.15011	1223.62	3150.11
122.6	12.7314	1.32455	12.2462	3.51262	3.15369	1224.62	3153.69
122.7	12.7418	1.32295	12.2565	3.51559	3.14989	1225.65	3149.89
122.8	12.7511	1.32547	12.2658	3.51826	3.15589	1226.58	3155.89
122.9	12.7618	1.3288	12.2766	3.52134	3.16381	1227.66	3163.81
123	12.7719	1.32935	12.2867	3.52424	3.16511	1228.67	3165.11
123.1	12.7809	1.32933	12.2957	3.52682	3.16507	1229.57	3165.07
123.2	12.7916	1.33015	12.3064	3.52988	3.16703	1230.64	3167.03
123.3	12.8017	1.33247	12.3165	3.5328	3.17255	1231.65	3172.55
123.4	12.811	1.33422	12.3258	3.53545	3.17672	1232.58	3176.72
123.5	12.8219	1.33334	12.3367	3.53858	3.17461	1233.67	3174.61
123.6	12.8317	1.33568	12.3465	3.54139	3.18018	1234.65	3180.18
123.7	12.8412	1.3359	12.356	3.54412	3.18071	1235.6	3180.71
123.8	12.8514	1.33666	12.3662	3.54704	3.18252	1236.62	3182.52
123.9	12.8615	1.33961	12.3763	3.54994	3.18955	1237.63	3189.55
124	12.872	1.3388	12.3867	3.55294	3.18762	1238.67	3187.62
124.1	12.8814	1.34233	12.3962	3.55564	3.19602	1239.62	3196.02
124.2	12.8913	1.34018	12.4061	3.55848	3.19092	1240.61	3190.92
124.3	12.9019	1.343	12.4167	3.56152	3.19762	1241.67	3197.62
124.4	12.9109	1.3421	12.4257	3.56412	3.19547	1242.57	3195.47
124.5	12.921	1.34373	12.4358	3.567	3.19936	1243.58	3199.36
124.6	12.9323	1.34678	12.447	3.57023	3.20661	1244.7	3206.61
124.7	12.9411	1.34896	12.4559	3.57278	3.2118	1245.59	3211.8
124.8	12.9509	1.34905	12.4656	3.57557	3.21201	1246.56	3212.01
124.9	12.9617	1.34844	12.4765	3.57868	3.21057	1247.65	3210.57
125	12.9715	1.34705	12.4863	3.58149	3.20725	1248.63	3207.25
125.1	12.9813	1.3511	12.4961	3.5843	3.21691	1249.61	3216.91
125.2	12.9916	1.35324	12.5064	3.58727	3.222	1250.64	3222
125.3	13.0013	1.35226	12.5161	3.59004	3.21967	1251.61	3219.67
125.4	13.0114	1.35481	12.5262	3.59293	3.22573	1252.62	3225.73
125.5	13.0213	1.35367	12.5361	3.59577	3.22301	1253.61	3223.01
125.6	13.0315	1.35575	12.5463	3.5987	3.22798	1254.63	3227.98
125.7	13.0421	1.3568	12.5569	3.60174	3.23047	1255.69	3230.47
125.8	13.0511	1.35518	12.5659	3.60433	3.22662	1256.59	3226.62
125.9	13.0616	1.35847	12.5764	3.60733	3.23446	1257.64	3234.46
126	13.0718	1.35854	12.5866	3.61026	3.23463	1258.66	3234.63
126.1	13.081	1.35887	12.5958	3.6129	3.23542	1259.58	3235.42
126.2	13.0918	1.3605	12.6066	3.61599	3.2393	1260.65	3239.3
126.3	13.1018	1.36018	12.6166	3.61887	3.23851	1261.66	3238.51
126.4	13.1113	1.36274	12.6261	3.62159	3.24463	1262.61	3244.63
126.5	13.1215	1.36345	12.6363	3.62452	3.2463	1263.63	3246.3
126.6	13.1315	1.36429	12.6463	3.62738	3.24831	1264.62	3248.31
126.7	13.1414	1.36431	12.6562	3.63023	3.24835	1265.62	3248.35
126.8	13.1518	1.36674	12.6666	3.63322	3.25414	1266.66	3254.14
126.9	13.1615	1.36738	12.6762	3.63597	3.25566	1267.62	3255.66
127	13.1717	1.3677	12.6864	3.6389	3.25642	1268.64	3256.42
127.1	13.1814	1.36704	12.6961	3.64169	3.25486	1269.61	3254.86
127.2	13.1911	1.3712	12.7059	3.64447	3.26477	1270.59	3264.77
127.3	13.2019	1.37164	12.7166	3.64757	3.26581	1271.66	3265.81
127.4	13.2115	1.37401	12.7263	3.65033	3.27145	1272.63	3271.45
127.5	13.2209	1.37185	12.7357	3.65303	3.26632	1273.57	3266.32
127.6	13.2317	1.37318	12.7465	3.65613	3.26949	1274.65	3269.49
127.7	13.2413	1.37615	12.7561	3.65889	3.27654	1275.61	3276.54
127.8	13.2512	1.37547	12.766	3.66172	3.27492	1276.6	3274.92
127.9	13.2617	1.37725	12.7765	3.66474	3.27918	1277.65	3279.18
128	13.2711	1.38001	12.7859	3.66743	3.28573	1278.59	3285.73
128.1	13.2811	1.37991	12.7959	3.6703	3.28551	1279.59	3285.51
128.2	13.2913	1.38064	12.8061	3.67323	3.28723	1280.61	3287.23
128.3	13.3012	1.38191	12.8159	3.67605	3.29027	1281.59	3290.27
128.4	13.3115	1.38202	12.8263	3.67902	3.29053	1282.63	3290.53
128.5	13.3212	1.38369	12.836	3.6818	3.29451	1283.6	3294.51
128.6	13.3313	1.38235	12.846	3.68468	3.2913	1284.6	3291.3
128.7	13.3419	1.38598	12.8566	3.68772	3.29995	1285.66	3299.95
128.8	13.3513	1.38536	12.866	3.69042	3.29848	1286.61	3298.48
128.9	13.3617	1.3869	12.8765	3.6934	3.30214	1287.64	3302.14
129	13.372	1.38748	12.8868	3.69636	3.30352	1288.68	3303.52
129.1	13.3809	1.38727	12.8957	3.69892	3.30303	1289.57	3303.03
129.2	13.3915	1.39052	12.9062	3.70195	3.31077	1290.62	3310.77
129.3	13.4017	1.39432	12.9165	3.70489	3.31981	1291.65	3319.81
129.4	13.411	1.39291	12.9258	3.70756	3.31644	1292.58	3316.44
129.5	13.4219	1.39191	12.9367	3.71069	3.31408	1293.67	3314.08
129.6	13.4316	1.39471	12.9464	3.71346	3.32074	1294.64	3320.74
129.7	13.4415	1.39425	12.9563	3.7163	3.31964	1295.62	3319.64
129.8	13.4514	1.39493	12.9661	3.71913	3.32127	1296.61	3321.27
129.9	13.4615	1.39679	12.9763	3.72204	3.32569	1297.63	3325.69
130	13.4719	1.39695	12.9867	3.72502	3.32606	1298.67	3326.06
130.1	13.4815	1.39821	12.9962	3.72776	3.32908	1299.62	3329.08
130.2	13.4914	1.39993	13.0061	3.73061	3.33317	1300.61	3333.17
130.3	13.5018	1.39888	13.0166	3.7336	3.33068	1301.66	3330.68
130.4	13.5112	1.40039	13.0259	3.73628	3.33425	1302.59	3334.25
130.5	13.5213	1.40363	13.036	3.73918	3.34198	1303.6	3341.98
130.6	13.5322	1.40423	13.047	3.74231	3.34341	1304.69	3343.41
130.7	13.5412	1.40126	13.0559	3.74489	3.33633	1305.59	3336.33
130.8	13.551	1.40444	13.0657	3.7477	3.34391	1306.57	3343.91
130.9	13.5617	1.40501	13.0765	3.75079	3.34526	1307.65	3345.26
131	13.5713	1.406	13.0861	3.75354	3.34762	1308.61	3347.62
131.1	13.5812	1.40941	13.096	3.75637	3.35575	1309.6	3355.75
131.2	13.5917	1.409	13.1064	3.75937	3.35477	1310.64	3354.77
131.3	13.6014	1.41185	13.1162	3.76217	3.36155	1311.62	3361.55
131.4	13.6113	1.41231	13.1261	3.765	3.36264	1312.61	3362.64
131.5	13.6213	1.41141	13.1361	3.76787	3.36049	1313.61	3360.49
131.6	13.6316	1.41574	13.1464	3.77083	3.37082	1314.64	3370.82
131.7	13.6419	1.41554	13.1567	3.77378	3.37033	1315.67	3370.33
131.8	13.6511	1.41506	13.1659	3.77642	3.36919	1316.59	3369.19
131.9	13.6616	1.41588	13.1763	3.77943	3.37115	1317.63	3371.15
132	13.6718	1.41823	13.1866	3.78237	3.37674	1318.66	3376.74
132.1	13.6809	1.41837	13.1957	3.78497	3.37706	1319.57	3377.06
132.2	13.6921	1.42102	13.2069	3.78818	3.38337	1320.69	3383.37
132.3	13.7018	1.41912	13.2166	3.79097	3.37885	1321.66	3378.85
132.4	13.7109	1.42066	13.2257	3.79358	3.38253	1322.57	3382.53
132.5	13.7216	1.42167	13.2364	3.79664	3.38493	1323.64	3384.93
132.6	13.7316	1.42238	13.2464	3.79951	3.38662	1324.64	3386.62
132.7	13.7414	1.42376	13.2561	3.80231	3.3899	1325.61	3389.9
132.8	13.7518	1.42545	13.2666	3.8053	3.39392	1326.66	3393.92
132.9	13.7615	1.4256	13.2763	3.80809	3.39428	1327.63	3394.28
133	13.7717	1.42775	13.2865	3.81101	3.39942	1328.64	3399.42
133.1	13.7812	1.42759	13.2959	3.81372	3.39902	1329.59	3399.02
133.2	13.7911	1.42752	13.3059	3.81658	3.39885	1330.59	3398.85
133.3	13.802	1.43111	13.3168	3.81971	3.40741	1331.68	3407.41
133.4	13.8111	1.4285	13.3258	3.8223	3.40119	1332.58	3401.19
133.5	13.821	1.43124	13.3357	3.82515	3.40772	1333.57	3407.72
133.6	13.8319	1.43443	13.3467	3.82829	3.41532	1334.67	3415.32
133.7	13.8413	1.43499	13.356	3.83097	3.41664	1335.61	3416.64
133.8	13.8511	1.43395	13.3658	3.83378	3.41418	1336.58	3414.18
133.9	13.8619	1.43897	13.3767	3.83689	3.42612	1337.67	3426.12
134	13.8713	1.43535	13.3861	3.83958	3.41749	1338.61	3417.49
134.1	13.881	1.43646	13.3958	3.84236	3.42015	1339.58	3420.15
134.2	13.8915	1.4385	13.4063	3.84538	3.42501	1340.63	3425.01
134.3	13.9016	1.43825	13.4164	3.84827	3.42441	1341.64	3424.41
134.4	13.9117	1.44072	13.4264	3.85116	3.43029	1342.64	3430.29
134.5	13.9213	1.44144	13.4361	3.85393	3.43199	1343.61	3431.99
134.6	13.9314	1.44166	13.4461	3.85681	3.43252	1344.61	3432.52
134.7	13.9417	1.442	13.4565	3.85977	3.43333	1345.64	3433.33
134.8	13.9512	1.44393	13.4659	3.86249	3.43792	1346.59	3437.92
134.9	13.9618	1.445	13.4766	3.86554	3.44048	1347.66	3440.48
135	13.9719	1.445	13.4867	3.86845	3.44048	1348.67	3440.48
135.1	13.9808	1.44588	13.4956	3.871	3.44257	1349.56	3442.57
135.2	13.9918	1.4475	13.5065	3.87413	3.44643	1350.65	3446.43
135.3	14.0017	1.44647	13.5165	3.877	3.44397	1351.65	3443.97
135.4	14.011	1.44938	13.5258	3.87965	3.4509	1352.58	3450.9
135.5	14.0219	1.45032	13.5367	3.88278	3.45315	1353.67	3453.15
135.6	14.0317	1.4528	13.5464	3.88558	3.45906	1354.64	3459.06
135.7	14.0411	1.45231	13.5559	3.88829	3.45787	1355.59	3457.87
135.8	14.0513	1.45413	13.566	3.8912	3.46221	1356.6	3462.21
135.9	14.0617	1.45404	13.5764	3.89418	3.46199	1357.64	3461.99
136	14.072	1.45467	13.5868	3.89716	3.4635	1358.68	3463.5
136.1	14.0814	1.45583	13.5962	3.89986	3.46625	1359.62	3466.25
136.2	14.0912	1.45534	13.606	3.90267	3.46508	1360.6	3465.08
136.3	14.1018	1.45633	13.6166	3.9057	3.46745	1361.66	3467.45
136.4	14.1111	1.45914	13.6258	3.90835	3.47414	1362.58	3474.14
136.5	14.1211	1.45947	13.6359	3.91123	3.47493	1363.59	3474.93
136.6	14.1322	1.46102	13.647	3.91443	3.47862	1364.7	3478.62
136.7	14.1411	1.46082	13.6559	3.91697	3.47813	1365.59	3478.13
136.8	14.1509	1.46166	13.6656	3.91977	3.48015	1366.56	3480.15
136.9	14.1617	1.46245	13.6765	3.92287	3.48203	1367.64	3482.03
137	14.1714	1.46304	13.6862	3.92567	3.48344	1368.62	3483.44
137.1	14.1813	1.46513	13.6961	3.9285	3.48841	1369.61	3488.41
137.2	14.1917	1.4669	13.7065	3.93149	3.49263	1370.65	3492.63
137.3	14.2014	1.4668	13.7162	3.93428	3.49238	1371.62	3492.38
137.4	14.2112	1.46682	13.726	3.93708	3.49243	1372.6	3492.43
137.5	14.2213	1.46707	13.736	3.93996	3.49302	1373.6	3493.02
137.6	14.2316	1.47083	13.7463	3.94292	3.50198	1374.63	3501.98
137.7	14.242	1.46811	13.7567	3.9459	3.4955	1375.67	3495.5
137.8	14.2511	1.47061	13.7659	3.94852	3.50145	1376.59	3501.45
137.9	14.2617	1.47104	13.7764	3.95156	3.50248	1377.64	3502.48
138	14.2717	1.47015	13.7864	3.95442	3.50035	1378.64	3500.35
138.1	14.2808	1.47192	13.7956	3.95704	3.50458	1379.56	3504.58
138.2	14.2919	1.47341	13.8067	3.96022	3.50813	1380.67	3508.13
138.3	14.3018	1.47377	13.8165	3.96306	3.50898	1381.65	3508.98
138.4	14.3109	1.47744	13.8256	3.96566	3.51771	1382.56	3517.71
138.5	14.3216	1.47687	13.8364	3.96875	3.51635	1383.64	3516.35
138.6	14.3317	1.47692	13.8464	3.97163	3.51649	1384.64	3516.49
138.7	14.3413	1.47927	13.8561	3.97439	3.52208	1385.61	3522.08
138.8	14.3517	1.47811	13.8665	3.97739	3.51932	1386.65	3519.32
138.9	14.3616	1.47847	13.8764	3.98021	3.52017	1387.63	3520.17
139	14.3718	1.47871	13.8866	3.98314	3.52073	1388.66	3520.73
139.1	14.3812	1.48174	13.896	3.98585	3.52796	1389.6	3527.96
139.2	14.3913	1.48233	13.9061	3.98874	3.52935	1390.61	3529.35
139.3	14.4022	1.48281	13.917	3.99187	3.53051	1391.7	3530.51
139.4	14.4111	1.48303	13.9259	3.99442	3.53102	1392.59	3531.02
139.5	14.4209	1.48419	13.9357	3.99723	3.53378	1393.57	3533.78
139.6	14.4318	1.48447	13.9466	4.00035	3.53444	1394.66	3534.44
139.7	14.4412	1.48528	13.9559	4.00304	3.53638	1395.59	3536.38
139.8	14.451	1.48695	13.9658	4.00586	3.54035	1396.58	3540.35
139.9	14.4619	1.48695	13.9767	4.009	3.54037	1397.67	3540.37
140	14.4713	1.48869	13.9861	4.01168	3.54449	1398.61	3544.49
140.1	14.4809	1.48988	13.9957	4.01444	3.54734	1399.57	3547.34
140.2	14.4916	1.4892	14.0064	4.01751	3.54571	1400.64	3545.71
140.3	14.5015	1.48869	14.0163	4.02035	3.54451	1401.63	3544.51
140.4	14.5116	1.49288	14.0263	4.02323	3.55447	1402.63	3554.47
140.5	14.5213	1.49384	14.0361	4.02604	3.55677	1403.61	3556.77
140.6	14.5314	1.49237	14.0462	4.02892	3.55327	1404.62	3553.27
140.7	14.5416	1.49513	14.0563	4.03184	3.55984	1405.63	3559.84
140.8	14.5511	1.49436	14.0659	4.03457	3.55799	1406.59	3557.99
140.9	14.5619	1.49758	14.0767	4.03768	3.56567	1407.67	3565.67
141	14.572	1.49665	14.0868	4.04057	3.56346	1408.68	3563.46
141.1	14.5808	1.49707	14.0956	4.0431	3.56444	1409.56	3564.44
141.2	14.5917	1.49958	14.1065	4.04622	3.57044	1410.65	3570.44
141.3	14.6018	1.50234	14.1166	4.04912	3.57701	1411.66	3577.01
141.4	14.6108	1.49951	14.1256	4.05171	3.57027	1412.56	3570.27
141.5	14.6219	1.50154	14.1366	4.05486	3.57511	1413.66	3575.11
141.6	14.6317	1.50035	14.1465	4.0577	3.57225	1414.65	3572.25
141.7	14.6412	1.50393	14.156	4.06041	3.5808	1415.6	3580.8
141.8	14.6514	1.50488	14.1661	4.06333	3.58306	1416.61	3583.06
141.9	14.6616	1.50462	14.1763	4.06626	3.58244	1417.63	3582.44
142	14.672	1.50488	14.1868	4.06925	3.58305	1418.68	3583.05
142.1	14.6814	1.50482	14.1962	4.07195	3.58291	1419.62	3582.91
142.2	14.6914	1.50524	14.2061	4.0748	3.5839	1420.61	3583.9
142.3	14.7019	1.50663	14.2167	4.07784	3.58723	1421.67	3587.23
142.4	14.711	1.50597	14.2258	4.08044	3.58564	1422.58	3585.64
142.5	14.721	1.50746	14.2358	4.08331	3.58918	1423.58	3589.18
142.6	14.7322	1.50877	14.247	4.08652	3.59231	1424.7	3592.31
142.7	14.7413	1.50951	14.2561	4.08913	3.59408	1425.61	3594.08
142.8	14.7508	1.51159	14.2655	4.09184	3.59902	1426.55	3599.02
142.9	14.7617	1.51211	14.2765	4.09499	3.60026	1427.65	3600.26
143	14.7715	1.51155	14.2863	4.09779	3.59893	1428.62	3598.93
143.1	14.7812	1.51221	14.296	4.10057	3.6005	1429.6	3600.5
143.2	14.7917	1.51506	14.3065	4.10358	3.60728	1430.65	3607.28
143.3	14.8014	1.51541	14.3162	4.10637	3.60812	1431.62	3608.12
143.4	14.8113	1.51436	14.3261	4.1092	3.60561	1432.61	3605.61
143.5	14.8213	1.51616	14.3361	4.11207	3.60991	1433.61	3609.91
143.6	14.8316	1.51666	14.3464	4.11504	3.6111	1434.64	3611.1
143.7	14.8421	1.51901	14.3568	4.11803	3.61669	1435.68	3616.69
143.8	14.8511	1.51937	14.3658	4.12061	3.61755	1436.58	3617.55
143.9	14.8615	1.51911	14.3762	4.12359	3.61693	1437.62	3616.93
144	14.8718	1.52091	14.3866	4.12656	3.62121	1438.66	3621.21
144.1	14.8809	1.52079	14.3956	4.12916	3.62094	1439.57	3620.94
144.2	14.8919	1.52272	14.4067	4.13233	3.62552	1440.67	3625.52
144.3	14.9018	1.52248	14.4166	4.13517	3.62496	1441.66	3624.96
144.4	14.9111	1.52396	14.4259	4.13783	3.62848	1442.59	3628.48
144.5	14.9216	1.52557	14.4363	4.14083	3.63232	1443.63	3632.32
144.6	14.9316	1.52738	14.4463	4.1437	3.63663	1444.63	3636.63
144.7	14.9414	1.52607	14.4562	4.14653	3.6335	1445.62	3633.5
144.8	14.9516	1.52788	14.4664	4.14944	3.6378	1446.63	3637.8
144.9	14.9614	1.52773	14.4762	4.15226	3.63745	1447.62	3637.45
145	14.9718	1.52964	14.4865	4.15523	3.64199	1448.65	3641.99
145.1	14.9813	1.52875	14.496	4.15796	3.63989	1449.6	3639.89
145.2	14.9914	1.53074	14.5061	4.16085	3.64462	1450.61	3644.62
145.3	15.0021	1.53265	14.5169	4.16394	3.64917	1451.69	3649.17
145.4	15.0112	1.52966	14.5259	4.16654	3.64204	1452.6	3642.04
145.5	15.021	1.5316	14.5357	4.16934	3.64666	1453.57	3646.66
145.6	15.0319	1.53201	14.5466	4.17247	3.64765	1454.66	3647.65
145.7	15.0413	1.53236	14.556	4.17517	3.64847	1455.6	3648.47
145.8	15.0511	1.53399	14.5659	4.17799	3.65236	1456.59	3652.36
145.9	15.0619	1.53631	14.5766	4.18108	3.65789	1457.66	3657.89
146	15.0713	1.53447	14.5861	4.18379	3.6535	1458.61	3653.5
146.1	15.081	1.53795	14.5958	4.18658	3.66178	1459.58	3661.78
146.2	15.0916	1.53758	14.6063	4.1896	3.6609	1460.63	3660.9
146.3	15.1014	1.53854	14.6161	4.19241	3.66318	1461.61	3663.18
146.4	15.1116	1.53919	14.6264	4.19535	3.66473	1462.64	3664.73
146.5	15.1213	1.54125	14.6361	4.19812	3.66965	1463.61	3669.65
146.6	15.1313	1.54082	14.6461	4.201	3.66862	1464.61	3668.62
146.7	15.1418	1.54054	14.6566	4.20401	3.66796	1465.66	3667.96
146.8	15.151	1.54236	14.6658	4.20664	3.67229	1466.58	3672.29
146.9	15.1618	1.5433	14.6766	4.20974	3.67451	1467.66	3674.51
147	15.1719	1.54505	14.6867	4.21264	3.67869	1468.67	3678.69
147.1	15.1808	1.54399	14.6956	4.2152	3.67616	1469.56	3676.16
147.2	15.1917	1.54794	14.7065	4.21831	3.68557	1470.64	3685.57
147.3	15.2018	1.54716	14.7165	4.22121	3.68372	1471.65	3683.72
147.4	15.2111	1.54883	14.7258	4.22388	3.6877	1472.59	3687.7
147.5	15.2219	1.54991	14.7367	4.22699	3.69025	1473.67	3690.25
147.6	15.2316	1.54953	14.7464	4.22977	3.68937	1474.64	3689.37
147.7	15.241	1.55154	14.7558	4.23247	3.69414	1475.58	3694.14
147.8	15.2512	1.55089	14.766	4.23538	3.69259	1476.6	3692.59
147.9	15.2615	1.55199	14.7763	4.23834	3.69523	1477.63	3695.23
148	15.2721	1.55294	14.7869	4.24138	3.69749	1478.69	3697.49
148.1	15.2814	1.55276	14.7962	4.24404	3.69705	1479.62	3697.05
148.2	15.2914	1.55414	14.8062	4.24691	3.70034	1480.62	3700.34
148.3	15.3019	1.55481	14.8166	4.24992	3.70193	1481.66	3701.93
148.4	15.311	1.55548	14.8258	4.25254	3.70352	1482.58	3703.52
148.5	15.321	1.55724	14.8358	4.25541	3.7077	1483.58	3707.7
148.6	15.3323	1.55711	14.8471	4.25865	3.70741	1484.71	3707.41
148.7	15.3412	1.5565	14.856	4.26121	3.70595	1485.6	3705.95
148.8	15.3509	1.55749	14.8656	4.26397	3.7083	1486.56	3708.3
148.9	15.3617	1.56091	14.8764	4.26707	3.71646	1487.64	3716.46
149	15.3714	1.55887	14.8861	4.26985	3.71159	1488.61	3711.59
149.1	15.3812	1.56015	14.896	4.27267	3.71465	1489.6	3714.65
149.2	15.3918	1.56183	14.9065	4.2757	3.71864	1490.65	3718.64
149.3	15.4015	1.5622	14.9162	4.27848	3.71952	1491.62	3719.52
149.4	15.4113	1.56229	14.9261	4.28131	3.71974	1492.61	3719.74
149.5	15.4213	1.56293	14.9361	4.28417	3.72125	1493.61	3721.25
149.6	15.4316	1.56523	14.9464	4.28713	3.72675	1494.64	3726.75
149.7	15.4419	1.56634	14.9567	4.29009	3.72937	1495.67	3729.37
149.8	15.4509	1.56599	14.9657	4.29267	3.72855	1496.57	3728.55
149.9	15.4616	1.56683	14.9764	4.29574	3.73054	1497.64	3730.54
150	15.4718	1.56679	14.9865	4.29865	3.73045	1498.65	3730.45
150.1	15.4809	1.56691	14.9956	4.30126	3.73074	1499.56	3730.74
150.2	15.492	1.57011	15.0068	4.30445	3.73836	1500.68	3738.36
150.3	15.5019	1.57073	15.0167	4.3073	3.73984	1501.67	3739.84
150.4	15.511	1.56974	15.0257	4.3099	3.73748	1502.57	3737.48
150.5	15.5215	1.57198	15.0363	4.31293	3.74282	1503.63	3742.82
150.6	15.5317	1.5725	15.0465	4.31583	3.74405	1504.64	3744.05
150.7	15.5414	1.57372	15.0562	4.31863	3.74695	1505.62	3746.95
150.8	15.5516	1.57288	15.0664	4.32156	3.74496	1506.64	3744.96
150.9	15.5615	1.57375	15.0763	4.3244	3.74702	1507.63	3747.02
151	15.5716	1.57401	15.0864	4.32729	3.74764	1508.64	3747.64
151.1	15.5812	1.57589	15.096	4.33005	3.75211	1509.6	3752.11
151.2	15.5913	1.57809	15.1061	4.33294	3.75735	1510.61	3757.35
151.3	15.6023	1.57969	15.117	4.33608	3.76117	1511.7	3761.17
151.4	15.6111	1.58033	15.1259	4.33862	3.76269	1512.59	3762.69
151.5	15.6209	1.57934	15.1357	4.34142	3.76033	1513.57	3760.33
151.6	15.6319	1.57947	15.1466	4.34458	3.76065	1514.66	3760.65
151.7	15.6413	1.58175	15.156	4.34727	3.76608	1515.6	3766.08
151.8	15.651	1.58349	15.1658	4.35007	3.77021	1516.58	3770.21
151.9	15.6618	1.58238	15.1766	4.35316	3.76756	1517.66	3767.56
152	15.6714	1.5839	15.1861	4.3559	3.77118	1518.61	3771.18
152.1	15.6809	1.58323	15.1957	4.35864	3.76959	1519.57	3769.59
152.2	15.6916	1.58658	15.2064	4.3617	3.77757	1520.64	3777.57
152.3	15.7015	1.58547	15.2163	4.36456	3.77493	1521.63	3774.93
152.4	15.7116	1.58781	15.2263	4.36743	3.7805	1522.63	3780.5
152.5	15.7213	1.58616	15.2361	4.37022	3.77657	1523.61	3776.57
152.6	15.7315	1.58813	15.2463	4.37315	3.78126	1524.63	3781.26
152.7	15.7416	1.58842	15.2564	4.37605	3.78196	1525.64	3781.96
152.8	15.7512	1.5882	15.2659	4.37879	3.78143	1526.59	3781.43
152.9	15.7619	1.59288	15.2767	4.38187	3.79257	1527.67	3792.57
153	15.772	1.59181	15.2868	4.38477	3.79002	1528.68	3790.02
153.1	15.7808	1.5908	15.2955	4.38728	3.78762	1529.55	3787.62
153.2	15.7917	1.592	15.3064	4.39041	3.79048	1530.64	3790.48
153.3	15.8018	1.59342	15.3166	4.39331	3.79385	1531.66	3793.85
153.4	15.8109	1.59447	15.3257	4.39594	3.79637	1532.57	3796.37
153.5	15.822	1.59579	15.3367	4.3991	3.79949	1533.67	3799.49
153.6	15.8318	1.59386	15.3466	4.40192	3.7949	1534.66	3794.9
153.7	15.841	1.59598	15.3558	4.40456	3.79994	1535.58	3799.94
153.8	15.8513	1.59641	15.3661	4.40751	3.80098	1536.61	3800.98
153.9	15.8618	1.5974	15.3765	4.41051	3.80334	1537.65	3803.34
154	15.872	1.59909	15.3868	4.41346	3.80735	1538.68	3807.35
154.1	15.8814	1.59815	15.3962	4.41614	3.80513	1539.62	3805.13
154.2	15.8912	1.59968	15.406	4.41897	3.80877	1540.6	3808.77
154.3	15.9019	1.60151	15.4167	4.42204	3.81312	1541.67	3813.12
154.4	15.911	1.60242	15.4258	4.42464	3.81528	1542.58	3815.28
154.5	15.921	1.60332	15.4358	4.42751	3.81743	1543.58	3817.43
154.6	15.9325	1.60315	15.4472	4.43079	3.81702	1544.72	3817.02
154.7	15.941	1.60323	15.4557	4.43324	3.81721	1545.57	3817.21
154.8	15.9508	1.60402	15.4655	4.43604	3.81909	1546.55	3819.09
154.9	15.9619	1.60621	15.4766	4.43923	3.82431	1547.66	3824.31
155	15.9714	1.60596	15.4862	4.44197	3.8237	1548.62	3823.7
155.1	15.9811	1.60752	15.4959	4.44475	3.82742	1549.59	3827.42
155.2	15.9917	1.60776	15.5065	4.44778	3.828	1550.65	3828
155.3	16.0016	1.60903	15.5163	4.45062	3.83101	1551.63	3831.01
155.4	16.0113	1.60821	15.5261	4.45341	3.82906	1552.61	3829.06
155.5	16.0213	1.61028	15.5361	4.45628	3.834	1553.61	3834
155.6	16.0319	1.61024	15.5466	4.4593	3.8339	1554.66	3833.9
155.7	16.0417	1.61084	15.5565	4.46213	3.83533	1555.65	3835.33
155.8	16.051	1.60889	15.5657	4.46479	3.83068	1556.58	3830.68
155.9	16.0617	1.61203	15.5765	4.46787	3.83816	1557.65	3838.16
156	16.0717	1.61354	15.5864	4.47073	3.84176	1558.64	3841.76
156.1	16.0808	1.61373	15.5956	4.47334	3.84222	1559.56	3842.22
156.2	16.0921	1.61511	15.6068	4.47657	3.84549	1560.68	3845.49
156.3	16.102	1.61559	15.6168	4.47943	3.84665	1561.68	3846.65
156.4	16.1107	1.61555	15.6255	4.48193	3.84655	1562.55	3846.55
156.5	16.1215	1.61804	15.6363	4.48502	3.85248	1563.63	3852.48
156.6	16.1318	1.61929	15.6465	4.48796	3.85545	1564.65	3855.45
156.7	16.1413	1.61808	15.6561	4.4907	3.85258	1565.61	3852.58
156.8	16.1515	1.62066	15.6663	4.49363	3.85871	1566.63	3858.71
156.9	16.1616	1.61931	15.6764	4.49651	3.8555	1567.64	3855.5
157	16.1718	1.62197	15.6865	4.49943	3.86184	1568.65	3861.84
157.1	16.1811	1.62235	15.6959	4.50212	3.86273	1569.59	3862.73
157.2	16.1913	1.62276	15.706	4.50503	3.86371	1570.61	3863.71
157.3	16.2024	1.62273	15.7171	4.50821	3.86363	1571.71	3863.63
157.4	16.2112	1.62469	15.7259	4.51074	3.86831	1572.59	3868.31
157.5	16.2208	1.62449	15.7356	4.5135	3.86783	1573.56	3867.83
157.6	16.232	1.62692	15.7468	4.51672	3.87363	1574.68	3873.63
157.7	16.2412	1.62699	15.7559	4.51934	3.8738	1575.59	3873.8
157.8	16.251	1.62721	15.7658	4.52217	3.87431	1576.58	3874.31
157.9	16.262	1.62832	15.7768	4.52531	3.87696	1577.68	3876.96
158	16.2713	1.62738	15.786	4.52798	3.8747	1578.6	3874.7
158.1	16.2808	1.6277	15.7956	4.53072	3.87548	1579.56	3875.48
158.2	16.2915	1.63071	15.8063	4.53378	3.88265	1580.63	3882.65
158.3	16.3016	1.62927	15.8163	4.53667	3.87922	1581.63	3879.22
158.4	16.3116	1.63006	15.8263	4.53953	3.8811	1582.63	3881.1
158.5	16.3212	1.63197	15.836	4.54231	3.88565	1583.6	3885.65
158.6	16.3316	1.63308	15.8463	4.54526	3.88829	1584.63	3888.29
158.7	16.3417	1.63352	15.8565	4.54818	3.88934	1585.65	3889.34
158.8	16.3511	1.63386	15.8658	4.55086	3.89015	1586.58	3890.15
158.9	16.3619	1.63282	15.8767	4.55397	3.88768	1587.67	3887.68
159	16.372	1.63604	15.8868	4.55687	3.89533	1588.68	3895.33
159.1	16.3807	1.63505	15.8955	4.55937	3.89298	1589.55	3892.98
159.2	16.3917	1.63651	15.9065	4.56253	3.89645	1590.65	3896.45
159.3	16.4018	1.63887	15.9166	4.56541	3.90206	1591.66	3902.06
159.4	16.411	1.64156	15.9258	4.56805	3.90847	1592.58	3908.47
159.5	16.4218	1.63807	15.9366	4.57117	3.90017	1593.66	3900.17
159.6	16.4319	1.6418	15.9466	4.57404	3.90904	1594.66	3909.04
159.7	16.4412	1.64092	15.9559	4.57671	3.90695	1595.59	3906.95
159.8	16.4514	1.64221	15.9661	4.57963	3.91002	1596.61	3910.02
159.9	16.4617	1.64084	15.9765	4.58259	3.90675	1597.65	3906.75
160	16.472	1.64243	15.9868	4.58556	3.91056	1598.68	3910.56
160.1	16.4813	1.64183	15.9961	4.58823	3.90911	1599.61	3909.11
160.2	16.4912	1.64224	16.006	4.59107	3.91009	1600.6	3910.09
160.3	16.502	1.64399	16.0168	4.59415	3.91425	1601.68	3914.25
160.4	16.5109	1.64482	16.0257	4.59671	3.91624	1602.57	3916.24
160.5	16.521	1.64874	16.0357	4.5996	3.92558	1603.57	3925.58
160.6	16.5323	1.64631	16.047	4.60284	3.91979	1604.7	3919.79
160.7	16.5413	1.64692	16.056	4.60542	3.92123	1605.6	3921.23
160.8	16.5508	1.64819	16.0656	4.60816	3.92426	1606.56	3924.26
160.9	16.5617	1.64977	16.0764	4.61127	3.92803	1607.64	3928.03
161	16.5714	1.64983	16.0861	4.61405	3.92816	1608.61	3928.16
161.1	16.5812	1.65154	16.096	4.61687	3.93224	1609.6	3932.24
161.2	16.5918	1.65056	16.1065	4.61991	3.9299	1610.65	3929.9
161.3	16.6015	1.65179	16.1163	4.6227	3.93282	1611.63	3932.82
161.4	16.6112	1.65163	16.1259	4.62547	3.93246	1612.6	3932.46
161.5	16.6212	1.65227	16.136	4.62835	3.93398	1613.6	3933.98
161.6	16.6316	1.65383	16.1464	4.63133	3.9377	1614.64	3937.7
161.7	16.642	1.65488	16.1568	4.63431	3.94018	1615.68	3940.18
161.8	16.6512	1.65609	16.1659	4.63694	3.94308	1616.59	3943.08
161.9	16.6618	1.65569	16.1765	4.63998	3.94211	1617.65	3942.11
162	16.6719	1.65616	16.1866	4.64288	3.94324	1618.66	3943.24
162.1	16.6808	1.65639	16.1956	4.64544	3.94379	1619.56	3943.79
162.2	16.6918	1.65722	16.2066	4.64859	3.94577	1620.66	3945.77
162.3	16.7019	1.65856	16.2167	4.65149	3.94894	1621.67	3948.94
162.4	16.7109	1.65926	16.2257	4.65408	3.95061	1622.57	3950.61
162.5	16.7215	1.66029	16.2363	4.65712	3.95306	1623.63	3953.06
162.6	16.7316	1.66081	16.2464	4.66002	3.95432	1624.64	3954.32
162.7	16.7414	1.66076	16.2561	4.66281	3.95419	1625.61	3954.19
162.8	16.7516	1.66241	16.2663	4.66574	3.95812	1626.63	3958.12
162.9	16.7614	1.66114	16.2762	4.66857	3.95509	1627.62	3955.09
163	16.7718	1.66425	16.2866	4.67155	3.96251	1628.66	3962.51
163.1	16.7811	1.6645	16.2959	4.67421	3.96309	1629.59	3963.09
163.2	16.7912	1.6647	16.306	4.67712	3.96357	1630.6	3963.57
163.3	16.8023	1.66766	16.3171	4.68029	3.97061	1631.71	3970.61
163.4	16.8112	1.66498	16.3259	4.68284	3.96423	1632.59	3964.23
163.5	16.8209	1.66701	16.3357	4.68562	3.96907	1633.57	3969.07
163.6	16.8318	1.66759	16.3466	4.68876	3.97045	1634.66	3970.45
163.7	16.8413	1.66752	16.3561	4.69148	3.97029	1635.61	3970.29
163.8	16.8511	1.66886	16.3658	4.69428	3.97348	1636.58	3973.48
163.9	16.8619	1.67108	16.3767	4.69739	3.97876	1637.67	3978.76
164	16.8713	1.66922	16.3861	4.70009	3.97434	1638.61	3974.34
164.1	16.881	1.67072	16.3957	4.70286	3.97791	1639.58	3977.91
164.2	16.8916	1.67269	16.4063	4.7059	3.98259	1640.63	3982.59
164.3	16.9016	1.67132	16.4163	4.70877	3.97933	1641.63	3979.33
164.4	16.9115	1.67399	16.4263	4.71162	3.98568	1642.63	3985.68
164.5	16.9213	1.67295	16.4361	4.71444	3.9832	1643.61	3983.2
164.6	16.9315	1.67619	16.4462	4.71734	3.99093	1644.62	3990.93
164.7	16.9417	1.67532	16.4564	4.72027	3.98887	1645.64	3988.87
164.8	16.951	1.67622	16.4658	4.72296	3.99099	1646.58	3990.99
164.9	16.9619	1.67551	16.4767	4.72607	3.98931	1647.67	3989.31
165	16.9721	1.6772	16.4868	4.72899	3.99333	1648.68	3993.33
165.1	16.9808	1.67695	16.4955	4.73148	3.99275	1649.55	3992.75
165.2	16.9917	1.67986	16.5065	4.73462	3.99967	1650.65	3999.67
165.3	17.0018	1.6806	16.5165	4.73751	4.00142	1651.65	4001.42
165.4	17.011	1.67909	16.5257	4.74014	3.99783	1652.57	3997.83
165.5	17.0219	1.68132	16.5366	4.74327	4.00314	1653.66	4003.14
165.6	17.0318	1.68035	16.5465	4.74611	4.00084	1654.65	4000.84
165.7	17.0412	1.68316	16.5559	4.74881	4.00751	1655.6	4007.51
165.8	17.0513	1.68346	16.5661	4.75173	4.00823	1656.61	4008.23
165.9	17.0615	1.68528	16.5763	4.75465	4.01257	1657.63	4012.57
166	17.0721	1.68459	16.5868	4.75766	4.01093	1658.68	4010.93
166.1	17.0814	1.68602	16.5962	4.76035	4.01434	1659.62	4014.34
166.2	17.0913	1.68583	16.6061	4.76319	4.01389	1660.61	4013.89
166.3	17.102	1.68551	16.6168	4.76625	4.01313	1661.68	4013.13
166.4	17.111	1.68723	16.6258	4.76884	4.01723	1662.58	4017.23
166.5	17.1211	1.68717	16.6358	4.77173	4.01706	1663.58	4017.06
166.6	17.1323	1.68879	16.647	4.77494	4.02093	1664.7	4020.93
166.7	17.1411	1.68896	16.6558	4.77746	4.02134	1665.58	4021.34
166.8	17.1507	1.69078	16.6655	4.78023	4.02566	1666.55	4025.66
166.9	17.1617	1.69161	16.6765	4.78339	4.02763	1667.65	4027.63
167	17.1714	1.69179	16.6862	4.78616	4.02808	1668.62	4028.08
167.1	17.1814	1.69254	16.6961	4.78902	4.02987	1669.61	4029.87
167.2	17.1916	1.69369	16.7064	4.79197	4.03259	1670.64	4032.59
167.3	17.2014	1.69327	16.7161	4.79476	4.0316	1671.61	4031.6
167.4	17.2112	1.6936	16.726	4.79759	4.03237	1672.6	4032.37
167.5	17.2214	1.69296	16.7361	4.80049	4.03086	1673.61	4030.86
167.6	17.2316	1.6953	16.7464	4.80343	4.03644	1674.64	4036.44
167.7	17.2419	1.6952	16.7566	4.80638	4.03619	1675.66	4036.19
167.8	17.251	1.69545	16.7658	4.809	4.03678	1676.58	4036.78
167.9	17.2616	1.69783	16.7764	4.81204	4.04246	1677.64	4042.46
168	17.2718	1.69842	16.7866	4.81497	4.04387	1678.66	4043.87
168.1	17.2809	1.70008	16.7957	4.81757	4.04782	1679.57	4047.82
168.2	17.2919	1.69847	16.8067	4.82074	4.04397	1680.67	4043.97
168.3	17.302	1.69947	16.8167	4.82361	4.04635	1681.67	4046.35
168.4	17.311	1.70189	16.8257	4.8262	4.05212	1682.57	4052.12
168.5	17.3216	1.70329	16.8363	4.82924	4.05544	1683.63	4055.44
168.6	17.3316	1.70298	16.8464	4.83212	4.05471	1684.64	4054.71
168.7	17.3413	1.70276	16.8561	4.8349	4.05418	1685.61	4054.18
168.8	17.3516	1.70384	16.8664	4.83785	4.05677	1686.64	4056.77
168.9	17.3615	1.70473	16.8763	4.8407	4.05889	1687.63	4058.89
169	17.3719	1.70431	16.8866	4.84367	4.05789	1688.66	4057.89
169.1	17.3812	1.70391	16.8959	4.84633	4.05694	1689.59	4056.94
169.2	17.3913	1.7052	16.9061	4.84924	4.06001	1690.61	4060.01
169.3	17.4021	1.70747	16.9169	4.85235	4.06541	1691.69	4065.41
169.4	17.4112	1.70511	16.9259	4.85494	4.05979	1692.59	4059.79
169.5	17.4209	1.70745	16.9357	4.85774	4.06535	1693.57	4065.35
169.6	17.4319	1.70979	16.9467	4.86088	4.07092	1694.67	4070.92
169.7	17.4413	1.70721	16.956	4.86357	4.06479	1695.6	4064.79
169.8	17.4511	1.7107	16.9659	4.86639	4.0731	1696.59	4073.1
169.9	17.4618	1.71127	16.9766	4.86947	4.07445	1697.66	4074.45
170	17.4712	1.71029	16.986	4.87217	4.07213	1698.6	4072.13
170.1	17.4809	1.71121	16.9957	4.87495	4.0743	1699.57	4074.3
170.2	17.4915	1.7138	17.0063	4.87799	4.08047	1700.63	4080.47
170.3	17.5016	1.71276	17.0163	4.88087	4.078	1701.63	4078
170.4	17.5116	1.71402	17.0264	4.88376	4.081	1702.64	4081
170.5	17.5213	1.71397	17.036	4.88652	4.08088	1703.61	4080.88
170.6	17.5314	1.71507	17.0462	4.88943	4.08351	1704.62	4083.51
170.7	17.5417	1.71511	17.0564	4.89236	4.0836	1705.64	4083.6
170.8	17.5511	1.71668	17.0659	4.89508	4.08733	1706.59	4087.33
170.9	17.5619	1.71673	17.0766	4.89816	4.08744	1707.66	4087.44
171	17.5721	1.71745	17.0868	4.90109	4.08916	1708.68	4089.16
171.1	17.5809	1.71618	17.0956	4.90361	4.08614	1709.56	4086.14
171.2	17.5917	1.71671	17.1064	4.90671	4.08741	1710.64	4087.41
171.3	17.6018	1.71876	17.1166	4.90962	4.09228	1711.66	4092.28
171.4	17.6109	1.71809	17.1257	4.91224	4.0907	1712.57	4090.7
171.5	17.6217	1.71951	17.1365	4.91533	4.09406	1713.65	4094.06
171.6	17.6317	1.72081	17.1464	4.91818	4.09716	1714.64	4097.16
171.7	17.6412	1.72048	17.156	4.92092	4.09639	1715.6	4096.39
171.8	17.6514	1.72315	17.1661	4.92384	4.10274	1716.62	4102.74
171.9	17.6616	1.72325	17.1764	4.92677	4.10298	1717.64	4102.98
172	17.6719	1.72329	17.1867	4.92973	4.10306	1718.67	4103.06
172.1	17.6814	1.72466	17.1962	4.93245	4.10634	1719.62	4106.34
172.2	17.6914	1.72319	17.2061	4.93531	4.10283	1720.61	4102.83
172.3	17.702	1.72438	17.2168	4.93837	4.10566	1721.68	4105.66
172.4	17.7111	1.72568	17.2258	4.94095	4.10876	1722.58	4108.76
172.5	17.7211	1.72634	17.2358	4.94383	4.11033	1723.59	4110.33
172.6	17.7322	1.726	17.247	4.94702	4.10953	1724.7	4109.53
172.7	17.7411	1.72527	17.2559	4.94958	4.10779	1725.59	4107.79
172.8	17.7507	1.72746	17.2655	4.95233	4.11301	1726.55	4113.01
172.9	17.7617	1.7293	17.2765	4.95549	4.11739	1727.65	4117.39
173	17.7715	1.72903	17.2862	4.95828	4.11673	1728.62	4116.73
173.1	17.7812	1.73002	17.296	4.96108	4.11909	1729.6	4119.09
173.2	17.7917	1.73144	17.3064	4.96407	4.12247	1730.64	4122.47
173.3	17.8015	1.73451	17.3162	4.96689	4.12979	1731.62	4129.79
173.4	17.8114	1.73036	17.3261	4.96973	4.1199	1732.61	4119.9
173.5	17.8212	1.73278	17.336	4.97254	4.12566	1733.6	4125.66
173.6	17.8316	1.7342	17.3464	4.97554	4.12905	1734.64	4129.05
173.7	17.8422	1.73417	17.3569	4.97856	4.12897	1735.69	4128.97
173.8	17.8511	1.73122	17.3658	4.98112	4.12195	1736.58	4121.95
173.9	17.8616	1.73501	17.3764	4.98413	4.13098	1737.64	4130.98
174	17.8716	1.73614	17.3864	4.98702	4.13366	1738.64	4133.66
174.1	17.8808	1.7366	17.3956	4.98965	4.13475	1739.56	4134.75
174.2	17.892	1.7374	17.4068	4.99286	4.13667	1740.68	4136.67
174.3	17.9019	1.73663	17.4167	4.99569	4.13482	1741.66	4134.82
174.4	17.911	1.73918	17.4258	4.9983	4.14091	1742.58	4140.91
174.458	17.917	1.73908	17.4317	5.00002	4.14067	1743.17	4140.67
