# Supplementary material for: Aorta smooth muscle-on-a-chip reveals impaired mitochondrial dynamics as a therapeutic target for aortic aneurysm in bicuspid aortic valve disease
Source: eLife journal article supplement (doi:10.7554/elife.69310), 2021-09-06
Supplement: supp [file Figure 1-source data 2.xlsx]

## Sheet: DEP_limma_0.5filter_tmm_2020110
	logFC	AveExpr	t	P.Value	adj.P.Val	B	UNIPROT
1	5.12234	26.0781	2.80169	0.0149164	0.675929	-3.02728	Q16774	GUK1
2	4.4465	18.0476	2.97763	0.010635	0.675929	-2.82576	P35556	FBN2
3	4.39879	18.4258	2.38413	0.0329581	0.676599	-3.50552	Q96L21	RPL10L
4	3.93384	19.7932	4.41901	0.000684241	0.654612	-1.29499	Q9NYU1	UGGT2
5	3.85764	20.9907	3.63239	0.00301293	0.654612	-2.09607	P19532	TFE3
6	3.50255	19.8788	2.89122	0.0125597	0.675929	-2.9246	Q96MM6	HSPA12B
7	3.45348	20.9511	2.94968	0.0112232	0.675929	-2.85769	Q6IN85	PPP4R3A
8	3.03408	20.7683	2.52804	0.0251349	0.675929	-3.34138	Q9Y6M5	SLC30A1
9	2.9647	20.2329	2.60561	0.0216952	0.675929	-3.25247	Q9UGM5	FETUB
10	2.93928	20.2618	3.72341	0.00253142	0.654612	-1.99853	Q96BW5	PTER
12	2.78589	21.6619	3.06961	0.00890673	0.675929	-2.72096	Q96H20	SNF8
13	2.78525	19.4443	2.60048	0.0219076	0.675929	-3.25835	Q5VT66	MTARC1
16	2.5333	21.8453	3.42247	0.00450971	0.675929	-2.32517	Q8NBX0	SCCPDH
17	2.52544	19.5438	3.07665	0.0087866	0.675929	-2.71296	Q8TAQ2	SMARCC2
21	2.4637	18.7946	2.93355	0.0115773	0.675929	-2.87614	P17568	NDUFB7
24	2.23571	18.633	2.82931	0.0141464	0.675929	-2.99558	Q9H9G7	AGO3
26	2.19435	18.9266	2.72755	0.0171926	0.675929	-3.11243	Q13188	STK3
29	2.13934	25.1223	2.18379	0.0477942	0.676599	-3.73101	P13645	KRT10
30	2.07328	19.7697	2.34957	0.0351582	0.676599	-3.54472	Q9Y2I8	WDR37
31	2.03913	22.2633	2.61806	0.0211871	0.675929	-3.23818	Q14376	GALE
32	2.03233	20.9262	3.77643	0.00228778	0.654612	-1.94224	Q14694	USP10
37	1.94474	19.1901	3.04048	0.00942148	0.675929	-2.75409	Q01974	ROR2
41	1.91528	19.5647	2.21358	0.0452465	0.676599	-3.69779	Q6P9A3	ZNF549
45	1.88038	21.0846	2.21477	0.0451471	0.676599	-3.69645	Q9Y5K5	UCHL5
47	1.86362	28.2388	2.29201	0.0391359	0.676599	-3.60975	Q5BKX8	CAVIN4
53	1.78416	20.2868	2.56634	0.0233753	0.675929	-3.29751	Q15772	SPEG
55	1.76119	21.1655	2.51067	0.0259743	0.675929	-3.36125	P07948	LYN
59	1.74599	20.1979	2.24984	0.0423174	0.676599	-3.65718	Q15427	SF3B4
61	1.72648	28.3109	2.6199	0.0211134	0.675929	-3.23607	P01860	IGHG3
63	1.7187	19.2416	2.45258	0.0289828	0.675929	-3.42761	Q9Y6E2	BZW2
65	1.69435	18.5229	3.23679	0.00645088	0.675929	-2.53202	P25067	COL8A2
74	1.66045	20.3301	3.34143	0.00527177	0.675929	-2.415	P11055	MYH3
77	1.61307	30.9809	2.47157	0.0279641	0.675929	-3.40593	P50747	HLCS
86	1.54051	18.194	2.4112	0.0313272	0.675929	-3.47475	P49407	ARRB1
91	1.51681	18.4033	2.44035	0.0296579	0.675929	-3.44156	Q5SW79	CEP170
93	1.50985	18.7108	2.37234	0.0336937	0.676599	-3.51891	Q8N357	SLC35F6
94	1.50965	17.6522	2.72062	0.0174222	0.675929	-3.1204	O43432	EIF4G3
99	1.45147	17.9563	2.19894	0.0464819	0.676599	-3.71413	O95249	GOSR1
100	1.44632	24.0363	3.60828	0.00315548	0.654612	-2.1221	P00491	PNP
101	1.44466	22.5238	2.90707	0.0121824	0.675929	-2.90644	Q9BZV1	UBXN6
105	1.4202	25.8876	3.12132	0.00806102	0.675929	-2.66228	P01861	IGHG4
107	1.41371	19.9076	2.73012	0.0171084	0.675929	-3.10948	Q86V88	MDP1
114	1.37437	24.2971	3.2257	0.00659042	0.675929	-2.54448	A4UGR9	XIRP2
115	1.36841	17.6157	2.4557	0.028813	0.675929	-3.42405	Q14739	LBR
118	1.33493	22.3587	2.72192	0.0173789	0.675929	-3.1189	O60841	EIF5B
122	1.32722	22.1377	2.94066	0.0114199	0.675929	-2.868	Q12857	NFIA
128	1.2514	22.9804	2.84308	0.0137772	0.675929	-2.97978	Q96C23	GALM
136	1.20296	17.4593	2.44523	0.0293867	0.675929	-3.43599	Q9NRA1	PDGFC
140	1.1758	21.3619	2.80209	0.0149049	0.675929	-3.02682	Q13509	TUBB3
141	1.17567	21.2981	2.50456	0.0262763	0.675929	-3.36825	P31431	SDC4
152	1.13787	26.8204	3.05166	0.00922059	0.675929	-2.74137	P02652	APOA2
163	1.08744	21.4031	2.78734	0.0153326	0.675929	-3.04376	Q76FK4	NOL8
168	1.07022	29.4026	3.44912	0.0042841	0.675929	-2.29578	P02647	APOA1
185	1.00424	25.5116	3.89659	0.00182033	0.654612	-1.81621	Q96PD5	PGLYRP2
192	0.96013	27.5008	2.49184	0.0269148	0.675929	-3.38278	P0DOY3	IGLC3
193	0.96013	27.5008	2.49184	0.0269148	0.675929	-3.38278	P0DOY2	IGLC2
205	0.933986	21.0915	2.64798	0.0200137	0.675929	-3.20383	Q13790	APOF
213	0.915135	29.4753	2.83621	0.0139601	0.675929	-2.98766	P02787	TF
228	0.887665	21.0102	2.25691	0.0417675	0.676599	-3.64924	P62166	NCS1
239	0.845528	21.2656	2.41573	0.0310625	0.675929	-3.4696	Q6KB66	KRT80
240	0.845276	24.7762	2.43941	0.0297104	0.675929	-3.44263	P04196	HRG
249	0.826832	26.6444	2.63894	0.0203614	0.675929	-3.21421	P05452	CLEC3B
250	0.824489	27.5303	3.33988	0.00528759	0.675929	-2.41673	P02765	AHSG
257	0.81203	20.2795	2.57625	0.0229394	0.675929	-3.28614	Q53H96	PYCR3
259	0.806981	26.1947	2.23929	0.0431509	0.676599	-3.66902	P19823	ITIH2
286	0.762228	23.9471	2.56688	0.0233514	0.675929	-3.29689	P00748	F12
309	0.721213	18.5526	2.22266	0.0444956	0.676599	-3.68763	Q9UNK0	STX8
313	0.711096	19.1288	2.60183	0.0218515	0.675929	-3.2568	P08514	ITGA2B
342	0.661103	21.9343	2.25907	0.0416012	0.676599	-3.64682	O00479	HMGN4
385	0.601406	29.1356	2.40772	0.0315329	0.675929	-3.47872	P02790	HPX
3426	-0.527092	23.1557	-2.18823	0.0474062	0.676599	-3.72607	P51659	HSD17B4
3566	-0.564934	21.5322	-2.17747	0.0483519	0.676599	-3.73805	O95881	TXNDC12
3583	-0.570812	27.307	-2.24855	0.0424187	0.676599	-3.65863	P06576	ATP5F1B
3594	-0.573718	25.9321	-2.35238	0.0349744	0.676599	-3.54154	P63244	RACK1
3602	-0.576798	28.8619	-2.35859	0.0345709	0.676599	-3.5345	Q9Y490	TLN1
3606	-0.578031	22.7672	-2.27365	0.0404923	0.676599	-3.63043	P22102	GART
3616	-0.582897	25.1813	-2.4345	0.0299858	0.675929	-3.44822	P68366	TUBA4A
3646	-0.593352	22.3885	-2.15991	0.0499338	0.676599	-3.75756	A0AVT1	UBA6
3686	-0.606414	24.4233	-2.28603	0.0395728	0.676599	-3.61649	P18859	ATP5PF
3688	-0.60741	27.561	-2.16997	0.0490217	0.676599	-3.74639	Q969G5	CAVIN3
3690	-0.607648	25.1351	-2.3225	0.0369786	0.676599	-3.57535	P24752	ACAT1
3694	-0.609834	23.3549	-2.42276	0.0306548	0.675929	-3.4616	Q9H3U1	UNC45A
3700	-0.613785	22.8132	-2.31392	0.0375745	0.676599	-3.58505	P49590	HARS2
3701	-0.61379	23.1884	-2.24372	0.0427988	0.676599	-3.66404	Q96F85	CNRIP1
3705	-0.615374	22.8252	-2.23223	0.0437171	0.676599	-3.67692	O14980	XPO1
3715	-0.618503	23.5692	-2.21993	0.0447199	0.676599	-3.69068	Q7L1Q6	BZW1
3739	-0.628631	21.69	-2.72195	0.0173779	0.675929	-3.11887	A1A4S6	ARHGAP10
3749	-0.63213	27.2455	-2.21248	0.0453378	0.676599	-3.69901	P25705	ATP5F1A
3763	-0.636246	27.576	-2.36679	0.034045	0.676599	-3.5252	Q96AC1	FERMT2
3768	-0.63754	22.1931	-2.27136	0.0406642	0.676599	-3.633	P15374	UCHL3
3783	-0.642559	25.6746	-2.32059	0.0371106	0.676599	-3.57751	P13987	CD59
3784	-0.643079	21.3498	-2.20381	0.046068	0.676599	-3.7087	Q9UBS4	DNAJB11
3799	-0.654239	24.936	-2.21444	0.045175	0.676599	-3.69683	P00736	C1R
3812	-0.65867	22.0125	-2.61069	0.0214864	0.675929	-3.24664	P31749	AKT1
3823	-0.664821	23.2452	-2.42084	0.0307659	0.675929	-3.46379	Q6NUK1	SLC25A24
3826	-0.665499	23.7087	-2.25535	0.0418882	0.676599	-3.651	P47813	EIF1AX
3827	-0.665499	23.7087	-2.25535	0.0418882	0.676599	-3.651	O14602	EIF1AY
3828	-0.665701	23.9399	-2.39383	0.032365	0.676599	-3.49451	O60749	SNX2
3831	-0.666819	21.4459	-2.42066	0.0307759	0.675929	-3.46399	Q9NUJ1	ABHD10
3833	-0.668141	22.543	-2.29181	0.039151	0.676599	-3.60999	P54819	AK2
3844	-0.669958	19.1345	-2.22626	0.0442006	0.676599	-3.6836	Q99570	PIK3R4
3846	-0.670123	24.0547	-2.45992	0.0285852	0.675929	-3.41924	Q92499	DDX1
3847	-0.670159	20.1977	-2.22588	0.0442319	0.676599	-3.68403	P51151	RAB9A
3863	-0.673545	21.0593	-2.49828	0.0265897	0.675929	-3.37542	Q9Y4P3	TBL2
3864	-0.673547	28.3204	-2.53661	0.0247301	0.675929	-3.33156	P05556	ITGB1
3868	-0.674506	23.8288	-2.48335	0.0273499	0.675929	-3.39249	Q02252	ALDH6A1
3872	-0.676362	24.2902	-2.54372	0.0243994	0.675929	-3.32342	P31942	HNRNPH3
3876	-0.678978	27.5014	-2.20297	0.0461386	0.676599	-3.70963	Q9BX66	SORBS1
3898	-0.690035	20.296	-2.42733	0.0303927	0.675929	-3.45639	Q9NXR7	BABAM2
3921	-0.699097	21.44	-2.73024	0.0171043	0.675929	-3.10934	Q13283	G3BP1
3939	-0.704861	24.1821	-2.27397	0.040468	0.676599	-3.63006	P62854	RPS26
3943	-0.706897	20.4372	-2.17983	0.0481427	0.676599	-3.73542	Q96N66	MBOAT7
3945	-0.708452	22.3687	-2.39918	0.0320418	0.675929	-3.48842	P0DN76	U2AF1L5
3946	-0.708452	22.3687	-2.39918	0.0320418	0.675929	-3.48842	Q01081	U2AF1
3948	-0.709493	23.6424	-2.56413	0.0234736	0.675929	-3.30004	Q16698	DECR1
3951	-0.711494	20.9996	-2.36518	0.0341477	0.676599	-3.52703	Q9NRW7	VPS45
3953	-0.712379	24.1431	-2.31933	0.0371979	0.676599	-3.57894	Q58FF8	HSP90AB2P
3957	-0.713827	24.8597	-2.28004	0.0400153	0.676599	-3.62324	P62081	RPS7
3960	-0.715212	25.0608	-2.60527	0.0217092	0.675929	-3.25286	P05141	SLC25A5
3976	-0.7254	24.28	-2.4773	0.0276638	0.675929	-3.3994	P62249	RPS16
3983	-0.72894	22.8906	-2.54041	0.0245529	0.675929	-3.32721	Q9C0C2	TNKS1BP1
3989	-0.732821	27.2848	-2.2108	0.0454787	0.676599	-3.70089	Q13418	ILK
3994	-0.734427	27.854	-2.75647	0.0162669	0.675929	-3.07921	Q15847	ADIRF
3997	-0.736003	24.2155	-2.56338	0.0235067	0.675929	-3.30089	Q9NP72	RAB18
3999	-0.737178	19.0641	-2.22447	0.0443468	0.676599	-3.6856	Q92785	DPF2
4000	-0.738921	22.0581	-2.32346	0.0369128	0.676599	-3.57427	Q9UKK9	NUDT5
4001	-0.73934	21.3444	-2.44196	0.029568	0.675929	-3.43972	Q969V3	NCLN
4009	-0.741781	21.4573	-2.25999	0.0415303	0.676599	-3.64579	Q12846	STX4
4013	-0.745793	27.5546	-2.37798	0.0333399	0.676599	-3.51251	P11021	HSPA5
4017	-0.746864	25.3529	-2.55782	0.0237558	0.675929	-3.30726	Q9Y3A5	SBDS
4018	-0.74689	23.3543	-2.64909	0.0199716	0.675929	-3.20256	P62191	PSMC1
4019	-0.747436	22.1373	-2.37707	0.0333967	0.676599	-3.51354	O15344	MID1
4030	-0.752151	23.9572	-2.53335	0.0248832	0.675929	-3.33529	P01033	TIMP1
4036	-0.757717	21.7937	-2.4067	0.0315931	0.675929	-3.47987	O95297	MPZL1
4039	-0.759312	23.4651	-2.64597	0.0200905	0.675929	-3.20614	Q96IX5	ATP5MD
4042	-0.761796	26.2473	-2.41871	0.0308886	0.675929	-3.4662	P12235	SLC25A4
4050	-0.765621	21.7268	-2.53079	0.0250042	0.675929	-3.33823	P49821	NDUFV1
4053	-0.767942	22.284	-2.70702	0.017881	0.675929	-3.13602	Q9UJZ1	STOML2
4063	-0.778128	21.0925	-2.6271	0.0208258	0.675929	-3.2278	Q969T9	WBP2
4067	-0.781206	25.9743	-2.61514	0.0213054	0.675929	-3.24153	P10809	HSPD1
4068	-0.78137	22.0174	-2.69429	0.0183213	0.675929	-3.15064	Q0VGL1	LAMTOR4
4069	-0.781498	24.8513	-2.99333	0.010318	0.675929	-2.80783	Q9H8H3	METTL7A
4070	-0.782579	20.884	-2.18883	0.0473543	0.676599	-3.7254	P50151	GNG10
4079	-0.788689	22.7173	-2.32447	0.0368435	0.676599	-3.57313	Q9H4G4	GLIPR2
4089	-0.79315	21.3647	-2.60391	0.021765	0.675929	-3.25441	Q53FT3	HIKESHI
4097	-0.795303	20.3786	-2.24453	0.0427346	0.676599	-3.66313	O94906	PRPF6
4098	-0.797278	24.666	-2.71014	0.0177748	0.675929	-3.13244	P10606	COX5B
4104	-0.799045	21.7725	-2.20136	0.0462756	0.676599	-3.71143	O14936	CASK
4106	-0.799771	23.8099	-2.36134	0.0343942	0.676599	-3.53139	P20340	RAB6A
4109	-0.801229	23.6939	-2.6251	0.0209053	0.675929	-3.2301	Q5JTV8	TOR1AIP1
4120	-0.812419	22.8087	-2.20822	0.0456948	0.676599	-3.70377	P31689	DNAJA1
4122	-0.814166	23.4265	-2.913	0.0120442	0.675929	-2.89965	P05026	ATP1B1
4123	-0.815026	26.811	-2.79389	0.0151412	0.675929	-3.03623	P43121	MCAM
4128	-0.817634	26.0787	-2.69371	0.0183416	0.675929	-3.15131	Q9UBY9	HSPB7
4136	-0.821886	22.6722	-2.45205	0.0290119	0.675929	-3.42822	Q9H8Y8	GORASP2
4138	-0.82213	18.0809	-2.53519	0.024797	0.675929	-3.33319	Q3SXM5	HSDL1
4139	-0.822369	24.0612	-2.50086	0.0264605	0.675929	-3.37247	P12236	SLC25A6
4151	-0.831733	27.6575	-2.53191	0.0249513	0.675929	-3.33695	Q15404	RSU1
4163	-0.83883	22.9683	-2.49148	0.0269332	0.675929	-3.38319	Q8NB37	GATD1
4164	-0.840137	22.4082	-2.97077	0.0107763	0.675929	-2.83358	Q99735	MGST2
4166	-0.841613	21.1219	-2.25995	0.0415328	0.676599	-3.64582	Q9H307	PNN
4167	-0.843607	23.1118	-2.49225	0.0268944	0.675929	-3.38232	Q15233	NONO
4168	-0.84361	23.0572	-2.40923	0.0314434	0.675929	-3.47699	Q9HB71	CACYBP
4170	-0.845542	24.8105	-2.21396	0.0452149	0.676599	-3.69736	P26006	ITGA3
4172	-0.847873	19.4022	-2.18345	0.0478238	0.676599	-3.73139	Q9H2U1	DHX36
4173	-0.848186	24.1413	-2.48398	0.0273175	0.675929	-3.39177	Q9Y5X1	SNX9
4174	-0.848382	25.2761	-2.58549	0.0225407	0.675929	-3.27555	P62424	RPL7A
4177	-0.850829	22.8892	-2.18769	0.0474531	0.676599	-3.72667	P67812	SEC11A
4179	-0.851367	21.64	-2.18479	0.0477067	0.676599	-3.7299	Q969E4	TCEAL3
4181	-0.852113	23.4138	-2.7367	0.0168944	0.675929	-3.10192	P21397	MAOA
4182	-0.852234	24.52	-2.60395	0.0217638	0.675929	-3.25438	Q96CW1	AP2M1
4183	-0.852743	24.5567	-2.72969	0.0171224	0.675929	-3.10997	P55268	LAMB2
4185	-0.855285	22.4256	-2.84232	0.0137973	0.675929	-2.98065	Q9Y6E0	STK24
4190	-0.858969	23.2251	-2.51165	0.0259262	0.675929	-3.36013	Q5TCS8	AK9
4198	-0.866862	19.6151	-2.21958	0.0447484	0.676599	-3.69107	P18031	PTPN1
4202	-0.867913	21.4882	-2.95887	0.0110263	0.675929	-2.84719	Q96I24	FUBP3
4207	-0.869904	22.6546	-2.7993	0.0149848	0.675929	-3.03002	Q92616	GCN1
4210	-0.872545	21.5118	-2.74785	0.0165376	0.675929	-3.08911	P50281	MMP14
4211	-0.873261	24.1524	-2.58862	0.022407	0.675929	-3.27196	Q02543	RPL18A
4212	-0.87442	28.1405	-2.73546	0.0169344	0.675929	-3.10334	Q15124	PGM5
4214	-0.879784	22.7217	-3.2768	0.00597161	0.675929	-2.48715	Q9NYU2	UGGT1
4221	-0.891463	24.3092	-3.2289	0.00654977	0.675929	-2.54088	P63010	AP2B1
4222	-0.89373	21.966	-2.3988	0.0320645	0.675929	-3.48885	Q9H4G0	EPB41L1
4232	-0.902534	20.4348	-2.38025	0.0331985	0.676599	-3.50993	Q96A57	TMEM230
4237	-0.905432	19.8374	-3.17367	0.00728646	0.675929	-2.60309	Q99707	MTR
4238	-0.906527	20.476	-2.33042	0.036437	0.676599	-3.56639	P56545	CTBP2
4243	-0.911638	20.5756	-2.43516	0.0299485	0.675929	-3.44747	Q9NX14	NDUFB11
4245	-0.91198	24.5149	-2.21368	0.0452383	0.676599	-3.69768	P61020	RAB5B
4249	-0.915529	20.9488	-2.32581	0.0367516	0.676599	-3.57161	O14972	VPS26C
4251	-0.916637	21.0295	-2.59944	0.021951	0.675929	-3.25954	P11233	RALA
4254	-0.918257	21.8877	-2.37288	0.0336594	0.676599	-3.51829	O43676	NDUFB3
4255	-0.918294	25.2518	-2.37434	0.0335679	0.676599	-3.51664	P05413	FABP3
4265	-0.933781	21.0918	-3.42888	0.00445431	0.675929	-2.31809	Q96A33	CCDC47
4266	-0.935548	21.2182	-2.2941	0.0389842	0.676599	-3.6074	Q8IX05	CD302
4270	-0.939509	24.3933	-2.55809	0.0237436	0.675929	-3.30695	Q9NUU7	DDX19A
4271	-0.939509	24.3933	-2.55809	0.0237436	0.675929	-3.30695	Q9UMR2	DDX19B
4276	-0.943282	22.0919	-2.46025	0.0285675	0.675929	-3.41886	Q8NCA5	FAM98A
4282	-0.952383	23.6467	-2.66986	0.0191958	0.675929	-3.1787	O60245	PCDH7
4288	-0.959985	20.6546	-2.31684	0.0373702	0.676599	-3.58174	Q9HCE6	ARHGEF10L
4291	-0.962425	27.6949	-2.58993	0.0223515	0.675929	-3.27046	P10301	RRAS
4294	-0.966082	21.799	-2.33118	0.0363856	0.676599	-3.56554	Q96GG9	DCUN1D1
4297	-0.973066	22.2891	-2.7662	0.0159666	0.675929	-3.06804	Q9NZB2	FAM120A
4303	-0.980406	24.0019	-2.4778	0.0276378	0.675929	-3.39883	Q8IX30	SCUBE3
4314	-0.991675	22.4934	-2.81886	0.014433	0.675929	-3.00757	Q15382	RHEB
4317	-0.994046	20.7536	-2.28358	0.0397532	0.676599	-3.61925	P07711	CTSL
4323	-0.997623	20.571	-2.88339	0.0127502	0.675929	-2.93356	P62312	LSM6
4327	-1.0036	23.4834	-2.16169	0.0497711	0.676599	-3.75559	P46937	YAP1
4335	-1.01183	25.3868	-2.60388	0.0217665	0.675929	-3.25445	Q9BUF5	TUBB6
4339	-1.01895	18.1563	-2.52537	0.0252621	0.675929	-3.34443	O15160	POLR1C
4341	-1.01951	26.7042	-3.01075	0.00997735	0.675929	-2.78796	Q15582	TGFBI
4342	-1.01959	21.2302	-2.2387	0.0431978	0.676599	-3.66967	Q8NDC0	MAPK1IP1L
4343	-1.02259	23.0795	-3.79033	0.00222796	0.654612	-1.92755	P62910	RPL32
4352	-1.03031	18.3545	-2.41189	0.0312867	0.675929	-3.47396	Q8N684	CPSF7
4353	-1.03038	19.4615	-2.57269	0.0230953	0.675929	-3.29023	Q9NZQ3	NCKIPSD
4359	-1.0434	20.724	-2.28828	0.0394084	0.676599	-3.61396	Q8NEU8	APPL2
4360	-1.04552	20.1337	-3.28416	0.0058874	0.675929	-2.47891	Q9NPJ3	ACOT13
4363	-1.04838	22.4395	-2.50346	0.0263306	0.675929	-3.3695	Q96AM1	MRGPRF
4364	-1.04859	23.966	-2.30082	0.0385006	0.676599	-3.59982	P26678	PLN
4367	-1.05042	22.6977	-2.3065	0.0380967	0.676599	-3.59342	P26368	U2AF2
4368	-1.0505	19.9612	-2.22819	0.044044	0.676599	-3.68144	Q96SU4	OSBPL9
4374	-1.0606	20.2804	-2.47689	0.027685	0.675929	-3.39986	Q9BV86	NTMT1
4375	-1.06271	23.067	-2.88946	0.0126023	0.675929	-2.92661	P63173	RPL38
4381	-1.0718	19.3414	-2.21378	0.0452295	0.676599	-3.69756	Q9BRZ2	TRIM56
4382	-1.07352	22.9809	-2.3179	0.0372968	0.676599	-3.58055	P35637	FUS
4385	-1.08384	25.4973	-2.63036	0.0206971	0.675929	-3.22407	P50895	BCAM
4387	-1.09133	25.6359	-3.10481	0.00832194	0.675929	-2.681	Q13683	ITGA7
4388	-1.09137	20.7705	-2.47168	0.0279584	0.675929	-3.40581	P49915	GMPS
4389	-1.09381	21.6116	-3.19536	0.00698774	0.675929	-2.57863	Q99538	LGMN
4391	-1.0949	19.6797	-2.40618	0.031624	0.675929	-3.48047	P56381	ATP5F1E
4392	-1.0949	19.6797	-2.40618	0.031624	0.675929	-3.48047	Q5VTU8	ATP5F1EP2
4393	-1.09614	21.4761	-3.12739	0.00796711	0.675929	-2.65541	P11717	IGF2R
4396	-1.09813	17.2533	-2.27529	0.0403695	0.676599	-3.62859	Q5R3I4	TTC38
4402	-1.12234	21.1598	-2.53277	0.0249107	0.675929	-3.33596	P49454	CENPF
4409	-1.1432	22.1688	-2.61927	0.0211385	0.675929	-3.23679	P16520	GNB3
4411	-1.14797	21.6203	-2.92922	0.0116742	0.675929	-2.88109	P04181	OAT
4415	-1.1571	21.1288	-2.16521	0.0494513	0.676599	-3.75168	Q9Y5Y7	LYVE1
4418	-1.16377	17.1296	-2.20401	0.0460504	0.676599	-3.70847	Q8NBK3	SUMF1
4419	-1.16431	17.63	-2.45412	0.0288993	0.675929	-3.42586	Q8N5G0	SMIM20
4421	-1.16803	20.7437	-2.84117	0.0138277	0.675929	-2.98197	P37198	NUP62
4429	-1.18317	21.877	-3.21105	0.00677933	0.675929	-2.56096	Q6IPX3	TCEAL6
4435	-1.19093	18.7285	-2.38447	0.0329373	0.676599	-3.50514	P49841	GSK3B
4438	-1.19271	23.4342	-3.71404	0.00257715	0.654612	-2.00851	Q96AQ6	PBXIP1
4439	-1.19319	21.2068	-2.47939	0.0275551	0.675929	-3.39701	Q92890	UFD1
4441	-1.19485	21.6185	-2.44255	0.0295354	0.675929	-3.43905	Q9NP98	MYOZ1
4442	-1.19914	20.6752	-2.73692	0.0168871	0.675929	-3.10166	P11226	MBL2
4443	-1.20271	18.3911	-2.60251	0.0218234	0.675929	-3.25603	Q6P4E1	GOLM2
4445	-1.20773	26.63	-3.68245	0.0027376	0.654612	-2.04228	P02763	ORM1
4447	-1.21289	17.2642	-2.1761	0.0484737	0.676599	-3.73957	O76021	RSL1D1
4448	-1.22272	22.6497	-3.58813	0.00327979	0.654612	-2.14391	P08648	ITGA5
4449	-1.22367	23.5819	-2.26716	0.040982	0.676599	-3.63772	Q9NQR4	NIT2
4451	-1.22497	22.7345	-2.6093	0.0215435	0.675929	-3.24824	Q9UBV8	PEF1
4452	-1.23795	27.0803	-3.66855	0.00281137	0.654612	-2.05718	Q14315	FLNC
4456	-1.25065	17.6264	-2.16558	0.0494177	0.676599	-3.75127	A8MTJ3	GNAT3
4458	-1.25682	21.1399	-2.54418	0.0243781	0.675929	-3.32289	O43516	WIPF1
4460	-1.27323	21.2723	-3.97929	0.00155642	0.654612	-1.73075	P52594	AGFG1
4461	-1.2749	20.3706	-2.5835	0.0226262	0.675929	-3.27783	P49840	GSK3A
4462	-1.27662	18.096	-3.04119	0.00940853	0.675929	-2.75328	O43236	SEPTIN4
4467	-1.28686	23.7822	-2.53146	0.0249725	0.675929	-3.33746	P02741	CRP
4469	-1.29019	21.4837	-2.72336	0.0173311	0.675929	-3.11725	Q15485	FCN2
4471	-1.29602	18.9793	-3.95828	0.00161951	0.654612	-1.75236	Q8N2K0	ABHD12
4473	-1.29922	23.7586	-3.77008	0.00231566	0.654612	-1.94896	O95817	BAG3
4476	-1.30215	17.1983	-2.23295	0.0436587	0.676599	-3.67611	P01911	HLA-DRB1
4481	-1.31254	24.1108	-2.18912	0.0473288	0.676599	-3.72508	P24593	IGFBP5
4483	-1.3182	21.8942	-2.22822	0.0440413	0.676599	-3.68141	Q8IWV7	UBR1
4487	-1.32243	25.043	-2.42147	0.0307292	0.675929	-3.46306	P12277	CKB
4490	-1.32548	19.8544	-3.20611	0.00684428	0.675929	-2.56652	Q9NZ45	CISD1
4491	-1.33068	20.0869	-2.6569	0.0196762	0.675929	-3.19358	Q5GLZ8	HERC4
4492	-1.33185	19.6242	-2.24283	0.0428694	0.676599	-3.66504	Q9UIK4	DAPK2
4494	-1.35129	25.249	-2.97985	0.0105894	0.675929	-2.82321	P07858	CTSB
4497	-1.37198	17.0022	-2.78526	0.015394	0.675929	-3.04615	Q8N138	ORMDL3
4498	-1.37335	19.4054	-2.27978	0.0400345	0.676599	-3.62353	P40222	TXLNA
4502	-1.39767	20.9053	-2.54708	0.0242447	0.675929	-3.31958	Q9GZP4	PITHD1
4503	-1.40313	20.8022	-2.33639	0.0360338	0.676599	-3.55964	O15294	OGT
4507	-1.43213	19.4899	-2.29263	0.0390909	0.676599	-3.60906	Q9Y3X0	CCDC9
4508	-1.43263	21.2028	-2.80512	0.0148185	0.675929	-3.02334	Q567U6	CCDC93
4509	-1.44145	24.7386	-2.71352	0.0176602	0.675929	-3.12855	Q02878	RPL6
4510	-1.44331	21.6111	-2.31753	0.0373227	0.676599	-3.58097	Q9BYC2	OXCT2
4512	-1.45632	22.7672	-2.91223	0.0120622	0.675929	-2.90053	Q86V81	ALYREF
4514	-1.47028	19.4663	-3.43947	0.00436443	0.675929	-2.30641	Q9P0I2	EMC3
4516	-1.48264	27.0325	-2.82813	0.0141784	0.675929	-2.99693	P01011	SERPINA3
4517	-1.48983	21.3098	-3.64883	0.00291957	0.654612	-2.07837	Q99836	MYD88
4519	-1.49084	21.0205	-2.7345	0.0169656	0.675929	-3.10445	Q969P0	IGSF8
4521	-1.49468	21.0056	-2.17396	0.048664	0.676599	-3.74195	P08962	CD63
4523	-1.5169	21.7929	-2.47869	0.0275915	0.675929	-3.39781	Q9BY89	KIAA1671
4524	-1.52677	19.5529	-2.54418	0.0243783	0.675929	-3.3229	Q8NI22	MCFD2
4525	-1.53496	19.5255	-3.22852	0.00655467	0.675929	-2.54131	P03897	MT-ND3
4530	-1.56491	21.0756	-2.18769	0.0474536	0.676599	-3.72667	Q9P270	SLAIN2
4531	-1.57222	18.694	-2.3645	0.0341913	0.676599	-3.5278	Q9NYB0	TERF2IP
4532	-1.57346	17.4451	-2.19096	0.0471693	0.676599	-3.72303	O14562	UBFD1
4533	-1.5749	19.4613	-2.77672	0.0156478	0.675929	-3.05595	Q6DKJ4	NXN
4535	-1.59681	23.58	-3.56872	0.00340427	0.654612	-2.16497	Q9BQE5	APOL2
4541	-1.63074	20.5073	-2.61814	0.0211842	0.675929	-3.23809	P46736	BRCC3
4544	-1.67476	17.5328	-2.61614	0.0212646	0.675929	-3.24038	P36954	POLR2I
4546	-1.68135	18.6838	-2.6693	0.0192164	0.675929	-3.17934	Q9BYP7	WNK3
4548	-1.68827	23.0094	-4.21361	0.00100197	0.654612	-1.49453	P49207	RPL34
4554	-1.72192	19.6172	-2.55065	0.0240809	0.675929	-3.31548	P20036	HLA-DPA1
4556	-1.73661	26.0694	-3.12488	0.00800591	0.675929	-2.65826	P18428	LBP
4557	-1.74183	20.7363	-2.55946	0.023682	0.675929	-3.30538	P15924	DSP
4559	-1.75803	19.0199	-2.3515	0.0350317	0.676599	-3.54253	P10746	UROS
4560	-1.76088	18.0786	-2.65609	0.0197069	0.675929	-3.19452	Q96PP8	GBP5
4564	-1.79699	21.4097	-3.10235	0.00836151	0.675929	-2.68378	Q86WV6	STING1
4566	-1.81477	18.4943	-2.79804	0.0150213	0.675929	-3.03148	Q14CN4	KRT72
4573	-1.88638	17.0417	-2.37534	0.033505	0.676599	-3.5155	Q9BTY2	FUCA2
4574	-1.89419	18.457	-2.20701	0.0457972	0.676599	-3.70512	P01782	IGHV3-9
4575	-1.89419	18.457	-2.20701	0.0457972	0.676599	-3.70512	P0DP04	IGHV3-43D
4578	-1.90806	17.4122	-2.34073	0.035743	0.676599	-3.55473	P49711	CTCF
4580	-1.96461	20.133	-2.2986	0.0386602	0.676599	-3.60233	Q9UKX3	MYH13
4581	-1.97283	17.3664	-2.86758	0.0131437	0.675929	-2.95169	Q8N8J0	PI4KAP1
4582	-1.99551	18.8192	-2.53128	0.0249812	0.675929	-3.33767	C9JQL5	NA
4583	-2.01071	20.3464	-2.49688	0.02666	0.675929	-3.37702	Q9BZE9	ASPSCR1
4584	-2.01332	20.7332	-2.39862	0.0320755	0.675929	-3.48906	Q9Y6K8	AK5
4585	-2.02611	20.2571	-2.60762	0.0216124	0.675929	-3.25017	Q9NNW7	TXNRD2
4586	-2.05641	21.2802	-3.36116	0.00507506	0.675929	-2.39307	Q53SF7	COBLL1
4589	-2.06887	16.7282	-3.96528	0.0015982	0.654612	-1.74515	O15121	DEGS1
4591	-2.09839	17.4643	-2.63977	0.0203291	0.675929	-3.21325	Q86V48	LUZP1
4592	-2.11415	18.1334	-2.32675	0.0366872	0.676599	-3.57055	Q9Y4D7	PLXND1
4593	-2.13061	19.3486	-3.8687	0.00191932	0.654612	-1.84527	B5MD39	GGTLC3
4594	-2.13061	19.3486	-3.8687	0.00191932	0.654612	-1.84527	Q14390	GGTLC2
4597	-2.22435	17.7798	-4.71093	0.000401253	0.617261	-1.0239	Q96B54	ZNF428
4598	-2.24523	18.5123	-2.17897	0.0482193	0.676599	-3.73638	Q9BW83	IFT27
4599	-2.28949	20.0857	-2.4546	0.0288731	0.675929	-3.42531	P09234	SNRPC
4608	-2.66542	18.4727	-2.67291	0.0190845	0.675929	-3.1752	Q5JVS0	HABP4
4610	-2.97511	21.2327	-3.77427	0.00229724	0.654612	-1.94453	A1L4H1	SSC5D
4611	-3.01429	22.0066	-3.19183	0.00703559	0.675929	-2.58261	P0DJI8	SAA1
4612	-3.06066	20.0824	-3.06643	0.00896148	0.675929	-2.72457	A4QPH2	PI4KAP2
4614	-3.42665	22.5626	-7.31362	5.705e-06	0.0263286	0.777783	Q5T2T1	MPP7
4615	-4.38583	22.3022	-5.23933	0.00015697	0.362209	-0.571015	Q96A49	SYAP1

## Sheet: Sheet1
Proteins	UNIPROT	logFC	AveExpr	t	P.Value	adj.P.Val	B
NDUFB7	Q16774	2.4637	18.7946	2.93355	0.0115773	0.675929	-2.87614	NADH dehydrogenase [ubiquinone] 1 beta subcomplex subunit 7
ATP5PF	P18859	-0.606414	24.4233	-2.28603	0.0395728	0.676599	-3.61649	ATP synthase-coupling factor 6, mitochondrial
MAOA	P21397	-0.852113	23.4138	-2.7367	0.0168944	0.675929	-3.10192	Amine oxidase [flavin-containing] A
NDUFB3	O43676	-0.918257	21.8877	-2.37288	0.0336594	0.676599	-3.51829	NADH dehydrogenase [ubiquinone] 1 beta subcomplex subunit 3
NDUFV1	P49821	-0.765621	21.7268	-2.53079	0.0250042	0.675929	-3.33823	NADH dehydrogenase [ubiquinone] flavoprotein 1, mitochondrial
ATP5F1E	P56381	-1.0949	19.6797	-2.40618	0.031624	0.675929	-3.48047	ATP synthase subunit epsilon, mitochondrial
TXNRD2	Q9NNW7	-2.02611	20.2571	-2.60762	0.0216124	0.675929	-3.25017	Thioredoxin reductase 2, mitochondrial
ATP5F1A	P25705	-0.63213	27.2455	-2.21248	0.0453378	0.676599	-3.69901	ATP synthase subunit alpha, mitochondrial
NDUFB11	Q9NX14	-0.911638	20.5756	-2.43516	0.0299485	0.675929	-3.44747	NADH dehydrogenase [ubiquinone] 1 beta subcomplex subunit 11, mitochondrial
ND3	P03897	-1.53496	19.5255	-3.22852	0.00655467	0.675929	-2.54131	NADH-ubiquinone oxidoreductase chain 3
COX5B	P10606	-0.797278	24.666	-2.71014	0.0177748	0.675929	-3.13244	Cytochrome c oxidase subunit 5B, mitochondrial
