# Supplementary material for: Aorta smooth muscle-on-a-chip reveals impaired mitochondrial dynamics as a therapeutic target for aortic aneurysm in bicuspid aortic valve disease
Source: eLife journal article supplement (doi:10.7554/elife.69310), 2021-09-06
Supplement: supp [file Figure 1-source data 3. .xls]

## Sheet: Sheet0
© 2000-2020 QIAGEN. All rights reserved.
Ingenuity Canonical Pathways	-log(p-value)	Ratio	z-score	Molecules
EIF2 Signaling	10.1	0.0943	-1.941	AGO3,AKT1,EIF1AX,EIF1AY,EIF4G3,EIF5B,GSK3B,HSPA5,PIK3R4,RALA,RPL18A,RPL32,RPL34,RPL38,RPL6,RPL7A,RPS16,RPS26,RPS7,RRAS
Acute Phase Response Signaling	9.61	0.101	-2.121	AHSG,AKT1,APOA1,APOA2,C1R,CRP,HPX,HRG,ITIH2,LBP,MBL2,MYD88,ORM1,RALA,RRAS,SAA1,SERPINA3,TF
Regulation of eIF4 and p70S6K Signaling	6.77	0.0864	-2.646	AGO3,AKT1,EIF1AX,EIF1AY,EIF4G3,ITGA3,ITGA5,ITGB1,PIK3R4,RALA,RPS16,RPS26,RPS7,RRAS
Clathrin-mediated Endocytosis Signaling	5.87	0.0729	#NUM!	AP2B1,AP2M1,APOA1,APOA2,APOF,ARRB1,ITGA5,ITGB1,ORM1,PDGFC,PIK3R4,RAB5B,SNX9,TF
Coronavirus Replication Pathway	5.55	0.167	-1.89	BAG3,CTSL,DDX1,GSK3A,GSK3B,TUBB3,TUBB6
ILK Signaling	5.32	0.0703	-0.632	AKT1,DSP,FERMT2,FLNC,GSK3A,GSK3B,ILK,ITGB1,MYH13,MYH3,PDGFC,PIK3R4,RSU1
Caveolar-mediated Endocytosis Signaling	4.86	0.11	#NUM!	FLNC,ITGA2B,ITGA3,ITGA5,ITGA7,ITGB1,PTPN1,RAB5B
FXR/RXR Activation	4.7	0.08	#NUM!	AHSG,AKT1,APOA1,APOA2,APOF,FETUB,HPX,ORM1,SAA1,TF
Oxidative Phosphorylation	4.56	0.0865	-2.333	ATP5F1A,ATP5F1E,ATP5PF,COX5B,MT-ND3,NDUFB11,NDUFB3,NDUFB7,NDUFV1
Sertoli Cell-Sertoli Cell Junction Signaling	4.49	0.0632	#NUM!	AKT1,GSK3A,GSK3B,ILK,ITGA3,ITGA5,ITGB1,RALA,RRAS,SORBS1,TUBB3,TUBB6
PTEN Signaling	4.39	0.0735	1.897	AKT1,GSK3A,GSK3B,IGF2R,ILK,ITGA3,ITGA5,ITGB1,RALA,RRAS
Mitochondrial Dysfunction	4.37	0.0667	#NUM!	ATP5F1A,ATP5F1E,ATP5PF,COX5B,MAOA,MT-ND3,NDUFB11,NDUFB3,NDUFB7,NDUFV1,TXNRD2
Integrin Signaling	4.17	0.0585	-2.309	AKT1,GSK3B,ILK,ITGA2B,ITGA3,ITGA5,ITGA7,ITGB1,PIK3R4,RALA,RRAS,WIPF1
Role of NFAT in Regulation of the Immune Response	4.12	0.0625	-0.707	AKT1,GNB3,GNG10,GSK3A,GSK3B,HLA-DRB1,LYN,PIK3R4,RALA,RRAS,XPO1
LXR/RXR Activation	4.04	0.0744	1.667	AHSG,APOA1,APOA2,APOF,HPX,LBP,ORM1,SAA1,TF
Sirtuin Signaling Pathway	3.97	0.0495	1.134	AKT1,ATP5F1A,ATP5F1E,ATP5PF,GSK3B,MT-ND3,NDUFB11,NDUFB3,NDUFB7,NDUFV1,POLR1C,SLC25A4,SLC25A5,SLC25A6
14-3-3-mediated Signaling	3.91	0.0714	-1.134	AKT1,GSK3A,GSK3B,PIK3R4,RALA,RRAS,TUBB3,TUBB6,YAP1
Ephrin Receptor Signaling	3.89	0.0588	-3.162	AKT1,GNB3,GNG10,ITGA3,ITGA5,ITGB1,PDGFC,RALA,RRAS,SORBS1,WIPF1
Virus Entry via Endocytic Pathways	3.81	0.0784	#NUM!	AP2B1,AP2M1,FLNC,ITGA5,ITGB1,PIK3R4,RALA,RRAS
PAK Signaling	3.72	0.0762	-1.89	ARHGAP10,ITGA3,ITGA5,ITGB1,PDGFC,PIK3R4,RALA,RRAS
IL-17 Signaling	3.69	0.0875	#NUM!	AKT1,CRP,GSK3B,PIK3R4,RALA,RRAS,TIMP1
Paxillin Signaling	3.69	0.0755	-2.449	ITGA2B,ITGA3,ITGA5,ITGA7,ITGB1,PIK3R4,RALA,RRAS
Germ Cell-Sertoli Cell Junction Signaling	3.67	0.0602	#NUM!	AKT1,ILK,ITGA3,ITGB1,PIK3R4,RALA,RRAS,SORBS1,TUBB3,TUBB6
HER-2 Signaling in Breast Cancer	3.56	0.0833	#NUM!	AKT1,GSK3A,GSK3B,ITGB1,PIK3R4,RALA,RRAS
Endometrial Cancer Signaling	3.55	0.1	-2.236	AKT1,GSK3B,ILK,PIK3R4,RALA,RRAS
Role of Tissue Factor in Cancer	3.45	0.0696	#NUM!	AKT1,ARRB1,ITGA3,ITGB1,LYN,PIK3R4,RALA,RRAS
GP6 Signaling Pathway	3.43	0.069	0.707	AKT1,COL8A2,GSK3A,GSK3B,ITGA2B,LAMB2,LYN,PIK3R4
ErbB2-ErbB3 Signaling	3.4	0.0938	-0.816	AKT1,GSK3A,GSK3B,PIK3R4,RALA,RRAS
PI3K/AKT Signaling	3.33	0.0546	-1.897	AKT1,GSK3A,GSK3B,ILK,ITGA3,ITGA5,ITGB1,RALA,RHEB,RRAS
Systemic Lupus Erythematosus Signaling	3.3	0.0502	#NUM!	AKT1,IGHG3,IGHG4,LSM6,LYN,PIK3R4,PRPF6,RALA,RRAS,SF3B4,SNRPC
VEGF Signaling	3.18	0.0722	-1.342	AKT1,EIF1AX,EIF1AY,PDGFC,PIK3R4,RALA,RRAS
Antiproliferative Role of Somatostatin Receptor 2	3.06	0.0811	-2	GNB3,GNG10,PIK3R4,RALA,RRAS,SMARCC2
Semaphorin Neuronal Repulsive Signaling Pathway	3.03	0.0602	1.414	AKT1,GSK3B,ITGA3,ITGA5,ITGB1,PIK3R4,PLXND1,RRAS
MSP-RON Signaling In Cancer Cells Pathway	3.03	0.0602	-0.707	AKT1,F12,GSK3B,ITGB1,PDGFC,PIK3R4,RALA,RRAS
FAK Signaling	3.03	0.068	#NUM!	AKT1,ITGA3,ITGA5,ITGB1,PIK3R4,RALA,RRAS
Axonal Guidance Signaling	3.03	0.0357	#NUM!	AKT1,BRCC3,GNB3,GNG10,GSK3B,ITGA3,ITGA5,ITGB1,MMP14,PDGFC,PIK3R4,PLXND1,RALA,RRAS,TUBB3,TUBB6,WIPF1
NF-κB Activation by Viruses	3	0.0789	-2.449	AKT1,ITGA3,ITGB1,PIK3R4,RALA,RRAS
Macropinocytosis Signaling	3	0.0789	-2	ITGA5,ITGB1,PDGFC,PIK3R4,RALA,RRAS
mTOR Signaling	3	0.0495	-2.236	AKT1,EIF4G3,PDGFC,PIK3R4,RALA,RHEB,RPS16,RPS26,RPS7,RRAS
Insulin Receptor Signaling	2.97	0.0588	-0.378	AKT1,GSK3A,GSK3B,PIK3R4,PTPN1,RALA,RRAS,STX4
Cdc42 Signaling	2.93	0.058	-1.633	GSK3B,HLA-DPA1,HLA-DRB1,ITGA3,ITGA5,ITGB1,RALA,WIPF1
Actin Nucleation by ARP-WASP Complex	2.91	0.0759	-2.236	ITGA3,ITGA5,ITGB1,RALA,RRAS,WIPF1
Estrogen Receptor Signaling	2.91	0.0405	-1.941	AKT1,ATP5F1A,ATP5F1E,CTBP2,GNB3,GSK3A,GSK3B,IGF2R,MMP14,PDGFC,PIK3R4,RALA,RRAS
B Cell Receptor Signaling	2.76	0.0497	-0.378	AKT1,GSK3A,GSK3B,IGHG3,IGHG4,LYN,PIK3R4,RALA,RRAS
Epithelial Adherens Junction Signaling	2.7	0.0533	#NUM!	AKT1,MYH13,MYH3,RALA,RRAS,SORBS1,TUBB3,TUBB6
Actin Cytoskeleton Signaling	2.69	0.045	-2.121	ITGA3,ITGA5,ITGB1,LBP,MYH13,MYH3,PDGFC,PIK3R4,RALA,RRAS
HGF Signaling	2.66	0.0588	-2.646	AKT1,ITGA3,ITGA5,ITGB1,PIK3R4,RALA,RRAS
Proline Biosynthesis II (from Arginine)	2.66	0.4	#NUM!	OAT,PYCR3
Galactose Degradation I (Leloir Pathway)	2.66	0.4	#NUM!	GALE,GALM
Reelin Signaling in Neurons	2.62	0.0579	-1.134	AKT1,GSK3B,ITGA3,ITGA5,ITGB1,LYN,PIK3R4
Docosahexaenoic Acid (DHA) Signaling	2.61	0.105	#NUM!	AKT1,GSK3A,GSK3B,PIK3R4
Phagosome Formation	2.6	0.0574	#NUM!	IGHG3,IGHG4,ITGA3,ITGA5,ITGB1,MBL2,PIK3R4
Protein Ubiquitination Pathway	2.59	0.041	#NUM!	DNAJA1,DNAJB11,HSPA12B,HSPA5,HSPB7,HSPD1,PSMC1,UBR1,UCHL3,UCHL5,USP10
Huntington's Disease Signaling	2.53	0.0427	#NUM!	AKT1,ATP5F1A,ATP5F1E,ATP5PF,GNB3,GNG10,GOSR1,HSPA5,PIK3R4,POLR2I
P2Y Purigenic Receptor Signaling Pathway	2.52	0.0556	-2.236	AKT1,GNB3,GNG10,ITGA2B,PIK3R4,RALA,RRAS
IL-6 Signaling	2.52	0.0556	-2.449	AKT1,CRP,HSPB7,LBP,PIK3R4,RALA,RRAS
ErbB4 Signaling	2.5	0.0758	-2	AKT1,PIK3R4,RALA,RRAS,YAP1
Arginine Degradation VI (Arginase 2 Pathway)	2.49	0.333	#NUM!	OAT,PYCR3
IL-12 Signaling and Production in Macrophages	2.43	0.0534	#NUM!	AKT1,APOA1,APOA2,APOF,MYD88,ORM1,PIK3R4
GM-CSF Signaling	2.39	0.0714	-1.342	AKT1,LYN,PIK3R4,RALA,RRAS
Hepatic Fibrosis Signaling Pathway	2.39	0.0352	-1.941	AKT1,GSK3B,ITGA3,ITGA5,ITGB1,MYD88,PDGFC,PIK3R4,RALA,RRAS,TF,TIMP1,YAP1
Colorectal Cancer Metastasis Signaling	2.37	0.0407	-1	AKT1,ARRB1,GNB3,GNG10,GSK3B,MMP14,PDGFC,PIK3R4,RALA,RRAS
Thioredoxin Pathway	2.35	0.286	#NUM!	NXN,TXNRD2
Neuregulin Signaling	2.33	0.0583	#NUM!	AKT1,ITGA3,ITGA5,ITGB1,RALA,RRAS
PD-1, PD-L1 cancer immunotherapy pathway	2.33	0.0583	1.342	AKT1,GSK3B,HLA-DPA1,HLA-DRB1,PIK3R4,YAP1
Regulation of Cellular Mechanics by Calpain Protease	2.31	0.0685	-2.236	ITGA3,ITGA5,ITGB1,RALA,RRAS
IL-7 Signaling Pathway	2.31	0.0685	0.447	AKT1,GSK3A,GSK3B,LYN,PIK3R4
Ovarian Cancer Signaling	2.31	0.0507	-0.816	AKT1,ARRB1,GSK3B,PDGFC,PIK3R4,RALA,RRAS
Phospholipase C Signaling	2.26	0.0392	-1	GNB3,GNG10,IGHG3,IGHG4,ITGA3,ITGA5,ITGB1,LYN,RALA,RRAS
FcγRIIB Signaling in B Lymphocytes	2.26	0.0667	-1.342	AKT1,LYN,PIK3R4,RALA,RRAS
Phagosome Maturation	2.26	0.0496	#NUM!	CTSB,CTSL,GOSR1,HLA-DRB1,RAB5B,TUBB3,TUBB6
Allograft Rejection Signaling	2.24	0.0833	#NUM!	HLA-DPA1,HLA-DRB1,IGHG3,IGHG4
Thyroid Cancer Signaling	2.22	0.0649	-1.342	AKT1,GSK3B,PIK3R4,RALA,RRAS
Glioma Signaling	2.21	0.055	-1.633	AKT1,IGF2R,PDGFC,PIK3R4,RALA,RRAS
MSP-RON Signaling In Macrophages Pathway	2.19	0.0545	0	F12,HLA-DPA1,HLA-DRB1,PIK3R4,RALA,RRAS
Melanoma Signaling	2.17	0.08	-2	AKT1,PIK3R4,RALA,RRAS
JAK/Stat Signaling	2.15	0.0625	-1.342	AKT1,PIK3R4,PTPN1,RALA,RRAS
NRF2-mediated Oxidative Stress Response	2.14	0.043	#NUM!	AKT1,DNAJA1,DNAJB11,GSK3B,MGST2,PIK3R4,RALA,RRAS
Endocannabinoid Developing Neuron Pathway	2.1	0.0522	-1.633	AKT1,GNB3,GSK3B,PIK3R4,RALA,RRAS
IL-4 Signaling	2.1	0.061	#NUM!	AKT1,HLA-DRB1,PIK3R4,RALA,RRAS
Natural Killer Cell Signaling	2.07	0.0419	-2.828	AKT1,HSPA5,ITGB1,MYD88,PIK3R4,RALA,RRAS,WIPF1
Aldosterone Signaling in Epithelial Cells	2.05	0.0455	#NUM!	DNAJA1,DNAJB11,HSPA12B,HSPA5,HSPB7,HSPD1,PIK3R4
Rac Signaling	2.02	0.05	-2.449	ITGA3,ITGA5,ITGB1,PIK3R4,RALA,RRAS
CNTF Signaling	2	0.0714	-2	AKT1,PIK3R4,RALA,RRAS
Prostate Cancer Signaling	1.95	0.0562	#NUM!	AKT1,GSK3B,PIK3R4,RALA,RRAS
HIF1α Signaling	1.95	0.0398	-0.707	AKT1,HSPA5,MMP14,PDGFC,PIK3R4,RALA,RRAS,TF
Maturity Onset Diabetes of Young (MODY) Signaling	1.92	0.0678	#NUM!	APOA1,APOA2,APOF,APOL2
Opioid Signaling Pathway	1.92	0.0369	-1.667	AKT1,AP2B1,AP2M1,ARRB1,GNB3,GSK3B,LYN,RALA,RRAS
CXCR4 Signaling	1.91	0.0427	-1.633	AKT1,GNB3,GNG10,LYN,PIK3R4,RALA,RRAS
ErbB Signaling	1.88	0.0538	-1.342	AKT1,GSK3B,PIK3R4,RALA,RRAS
IL-2 Signaling	1.87	0.0656	-2	AKT1,PIK3R4,RALA,RRAS
SPINK1 General Cancer Pathway	1.87	0.0656	-2	AKT1,PIK3R4,RALA,RRAS
Tec Kinase Signaling	1.85	0.0414	-1.342	GNB3,GNG10,ITGA3,ITGA5,ITGB1,LYN,PIK3R4
Xanthine and Xanthosine Salvage	1.82	1	#NUM!	PNP
UDP-N-acetyl-D-galactosamine Biosynthesis I	1.82	1	#NUM!	GALE
Role of Macrophages, Fibroblasts and Endothelial Cells in Rheumatoid Arthritis	1.79	0.0332	#NUM!	AKT1,GSK3B,IGHG3,IGHG4,MYD88,PDGFC,PIK3R4,RALA,ROR2,RRAS
Complement System	1.78	0.0833	#NUM!	C1R,CD59,MBL2
Tumor Microenvironment Pathway	1.77	0.04	-1.89	AKT1,ITGA5,MMP14,PDGFC,PIK3R4,RALA,RRAS
Remodeling of Epithelial Adherens Junctions	1.76	0.0606	#NUM!	RAB5B,RALA,TUBB3,TUBB6
Agranulocyte Adhesion and Diapedesis	1.76	0.0398	#NUM!	ITGA3,ITGA5,ITGB1,MMP14,MYH13,MYH3,SDC4
NF-κB Signaling	1.76	0.0398	-2.646	AKT1,GSK3B,IGF2R,MYD88,PIK3R4,RALA,RRAS
Hereditary Breast Cancer Signaling	1.75	0.0438	#NUM!	AKT1,PIK3R4,POLR2I,RALA,RRAS,SMARCC2
Synaptogenesis Signaling Pathway	1.74	0.0326	-1.265	AKT1,AP2B1,AP2M1,GOSR1,GSK3B,LYN,PIK3R4,RAB5B,RALA,RRAS
Chronic Myeloid Leukemia Signaling	1.72	0.049	#NUM!	AKT1,CTBP2,PIK3R4,RALA,RRAS
Mouse Embryonic Stem Cell Pluripotency	1.72	0.049	-1.342	AKT1,GSK3B,PIK3R4,RALA,RRAS
Hepatic Fibrosis / Hepatic Stellate Cell Activation	1.69	0.0385	#NUM!	COL8A2,IGFBP5,LBP,MYH13,MYH3,PDGFC,TIMP1
Telomerase Signaling	1.69	0.0481	-2	AKT1,PIK3R4,RALA,RRAS,TERF2IP
IGF-1 Signaling	1.69	0.0481	-2	AKT1,IGFBP5,PIK3R4,RALA,RRAS
TREM1 Signaling	1.67	0.0571	-2	AKT1,ITGA5,ITGB1,MYD88
Glioma Invasiveness Signaling	1.65	0.0563	-1	PIK3R4,RALA,RRAS,TIMP1
Pyrimidine Ribonucleotides Interconversion	1.63	0.0732	#NUM!	AK5,AK9,NUDT5
Regulation Of The Epithelial Mesenchymal Transition By Growth Factors Pathway	1.62	0.0372	-1.134	AKT1,GSK3B,PDGFC,PIK3R4,RALA,RRAS,YAP1
Non-Small Cell Lung Cancer Signaling	1.61	0.0548	-2	AKT1,PIK3R4,RALA,RRAS
Estrogen-Dependent Breast Cancer Signaling	1.61	0.0548	-2	AKT1,PIK3R4,RALA,RRAS
Autoimmune Thyroid Disease Signaling	1.6	0.0714	#NUM!	HLA-DRB1,IGHG3,IGHG4
Angiopoietin Signaling	1.6	0.0541	#NUM!	AKT1,PIK3R4,RALA,RRAS
IL-15 Signaling	1.58	0.0533	-2	AKT1,PIK3R4,RALA,RRAS
Adrenomedullin signaling pathway	1.58	0.0365	-0.816	AKT1,GSK3A,GSK3B,PIK3R4,RALA,RRAS,SMARCC2
Pyrimidine Ribonucleotides De Novo Biosynthesis	1.57	0.0698	#NUM!	AK5,AK9,NUDT5
Neurotrophin/TRK Signaling	1.56	0.0526	-2	AKT1,PIK3R4,RALA,RRAS
Gap Junction Signaling	1.56	0.0361	#NUM!	AKT1,PIK3R4,RALA,RRAS,SMARCC2,TUBB3,TUBB6
IL-8 Signaling	1.53	0.0357	-1.633	AKT1,GNB3,GNG10,PDGFC,PIK3R4,RALA,RRAS
β-alanine Degradation I	1.52	0.5	#NUM!	ALDH6A1
Guanine and Guanosine Salvage I	1.52	0.5	#NUM!	PNP
Adenine and Adenosine Salvage I	1.52	0.5	#NUM!	PNP
fMLP Signaling in Neutrophils	1.52	0.0435	-2	GNB3,GNG10,PIK3R4,RALA,RRAS
Renal Cell Carcinoma Signaling	1.52	0.0513	-2	AKT1,PIK3R4,RALA,RRAS
IL-3 Signaling	1.5	0.0506	-2	AKT1,PIK3R4,RALA,RRAS
FLT3 Signaling in Hematopoietic Progenitor Cells	1.5	0.0506	-2	AKT1,PIK3R4,RALA,RRAS
Fc Epsilon RI Signaling	1.49	0.0427	-1.342	AKT1,LYN,PIK3R4,RALA,RRAS
Role of NANOG in Mammalian Embryonic Stem Cell Pluripotency	1.49	0.0427	-1.342	AKT1,GSK3B,PIK3R4,RALA,RRAS
ERK/MAPK Signaling	1.48	0.0348	-2.646	HSPB7,ITGA3,ITGA5,ITGB1,PIK3R4,RALA,RRAS
CCR3 Signaling in Eosinophils	1.45	0.0417	#NUM!	GNB3,GNG10,PIK3R4,RALA,RRAS
PEDF Signaling	1.45	0.0488	-2	AKT1,PIK3R4,RALA,RRAS
Spliceosomal Cycle	1.45	0.0625	#NUM!	SF3B4,U2AF1/U2AF1L5,U2AF2
Inflammasome pathway	1.44	0.1	#NUM!	CTSB,MYD88
Signaling by Rho Family GTPases	1.44	0.032	-1.633	GNB3,GNG10,ITGA3,ITGA5,ITGB1,PIK3R4,SEPTIN4,WIPF1
Glioblastoma Multiforme Signaling	1.44	0.037	-0.816	AKT1,GSK3B,PDGFC,PIK3R4,RALA,RRAS
LPS-stimulated MAPK Signaling	1.44	0.0482	#NUM!	LBP,PIK3R4,RALA,RRAS
G Beta Gamma Signaling	1.43	0.041	-2.236	AKT1,GNB3,GNG10,RALA,RRAS
VEGF Family Ligand-Receptor Interactions	1.42	0.0476	-2	AKT1,PIK3R4,RALA,RRAS
Atherosclerosis Signaling	1.42	0.0407	#NUM!	APOA1,APOA2,APOF,ORM1,PDGFC
PDGF Signaling	1.39	0.0465	-1	PDGFC,PIK3R4,RALA,RRAS
LPS/IL-1 Mediated Inhibition of RXR Function	1.39	0.0332	#NUM!	ALDH6A1,FABP3,LBP,MAOA,MGST2,MYD88,XPO1
Tight Junction Signaling	1.39	0.0359	#NUM!	AKT1,CASK,GOSR1,MYH13,MYH3,STX4
Role of NFAT in Cardiac Hypertrophy	1.39	0.0332	-1.633	AKT1,GNB3,GNG10,GSK3B,PIK3R4,RALA,RRAS
AMPK Signaling	1.37	0.0329	#NUM!	AK2,AK5,AK9,AKT1,PIK3R4,RAB6A,SMARCC2
Pyrimidine Deoxyribonucleotides De Novo Biosynthesis I	1.37	0.0909	#NUM!	AK5,AK9
T Cell Exhaustion Signaling Pathway	1.37	0.0355	#NUM!	AKT1,HLA-DPA1,HLA-DRB1,PIK3R4,RALA,RRAS
Glucocorticoid Receptor Signaling	1.36	0.0264	#NUM!	AKT1,ATP5F1A,ATP5F1E,HSPA5,KRT10,KRT72,KRT80,PIK3R4,POLR2I,RALA,RRAS,SMARCC2
Ceramide Signaling	1.36	0.0455	0	AKT1,PIK3R4,RALA,RRAS
CTLA4 Signaling in Cytotoxic T Lymphocytes	1.36	0.0455	#NUM!	AKT1,AP2B1,AP2M1,PIK3R4
Acute Myeloid Leukemia Signaling	1.36	0.0455	-2	AKT1,PIK3R4,RALA,RRAS
p70S6K Signaling	1.35	0.0391	-1.342	AKT1,LYN,PIK3R4,RALA,RRAS
Methionine Salvage II (Mammalian)	1.35	0.333	#NUM!	MTR
Biotin-carboxyl Carrier Protein Assembly	1.35	0.333	#NUM!	HLCS
Autophagy	1.34	0.0566	#NUM!	CTSB,CTSL,PIK3R4
Vitamin-C Transport	1.33	0.087	#NUM!	NXN,TXNRD2
Systemic Lupus Erythematosus In B Cell Signaling Pathway	1.32	0.0302	-2.121	AKT1,GSK3B,LYN,MYD88,PIK3R4,RALA,RRAS,STING1
Dendritic Cell Maturation	1.32	0.0345	-0.816	AKT1,HLA-DRB1,IGHG3,IGHG4,MYD88,PIK3R4
Human Embryonic Stem Cell Pluripotency	1.31	0.0379	#NUM!	AKT1,GSK3A,GSK3B,PDGFC,PIK3R4
Lipid Antigen Presentation by CD1	1.3	0.0833	#NUM!	AP2B1,AP2M1
α-Adrenergic Signaling	1.27	0.0426	#NUM!	GNB3,GNG10,RALA,RRAS
Nitric Oxide Signaling in the Cardiovascular System	1.27	0.0426	-1	AKT1,PDGFC,PIK3R4,PLN
Cancer Drug Resistance By Drug Efflux	1.25	0.0517	#NUM!	AKT1,RALA,RRAS
Bladder Cancer Signaling	1.24	0.0417	#NUM!	MMP14,PDGFC,RALA,RRAS
Xenobiotic Metabolism General Signaling Pathway	1.24	0.0362	-2.236	AKT1,MGST2,PIK3R4,RALA,RRAS
Apelin Liver Signaling Pathway	1.24	0.0769	#NUM!	GSK3A,GSK3B
Regulation of Actin-based Motility by Rho	1.23	0.0412	-2	ITGA3,ITGA5,ITGB1,WIPF1
Arsenate Detoxification I (Glutaredoxin)	1.23	0.25	#NUM!	PNP
Proline Biosynthesis I	1.23	0.25	#NUM!	PYCR3
Melatonin Degradation II	1.23	0.25	#NUM!	MAOA
Arginine Degradation I (Arginase Pathway)	1.23	0.25	#NUM!	OAT
Induction of Apoptosis by HIV1	1.21	0.05	#NUM!	SLC25A4,SLC25A5,SLC25A6
Production of Nitric Oxide and Reactive Oxygen Species in Macrophages	1.2	0.0323	0	AKT1,APOA1,APOA2,APOF,ORM1,PIK3R4
Cardiac Hypertrophy Signaling (Enhanced)	1.19	0.0247	-1.732	AKT1,GNB3,GSK3A,GSK3B,HSPB7,ITGA3,ITGA5,ITGB1,PIK3R4,PLN,RALA,RRAS
Role of PI3K/AKT Signaling in the Pathogenesis of Influenza	1.19	0.0492	#NUM!	AKT1,GSK3B,PIK3R4
Cardiac Hypertrophy Signaling	1.18	0.0298	-1.633	AKT1,GNB3,GNG10,GSK3B,PIK3R4,RALA,RRAS
Superpathway of Cholesterol Biosynthesis	1.18	0.0714	#NUM!	ACAT1,LBR
SAPK/JNK Signaling	1.18	0.0396	-2	GNB3,PIK3R4,RALA,RRAS
Leukocyte Extravasation Signaling	1.18	0.0317	-1.633	ITGA3,ITGB1,MMP14,PIK3R4,TIMP1,WIPF1
Thrombopoietin Signaling	1.16	0.0476	#NUM!	PIK3R4,RALA,RRAS
Coronavirus Pathogenesis Pathway	1.16	0.0342	2	CTSL,RPS16,RPS26,RPS7,STING1
Relaxin Signaling	1.15	0.034	#NUM!	AKT1,GNB3,GNG10,PIK3R4,SMARCC2
IL-17A Signaling in Airway Cells	1.14	0.0469	#NUM!	AKT1,GSK3B,PIK3R4
Creatine-phosphate Biosynthesis	1.14	0.2	#NUM!	CKB
Tetrapyrrole Biosynthesis II	1.14	0.2	#NUM!	UROS
G Protein Signaling Mediated by Tubby	1.13	0.0667	#NUM!	GNB3,GNG10
CDK5 Signaling	1.11	0.0374	#NUM!	ITGA3,ITGB1,RALA,RRAS
Role of JAK1 and JAK3 in γc Cytokine Signaling	1.1	0.0448	#NUM!	PIK3R4,RALA,RRAS
Pancreatic Adenocarcinoma Signaling	1.1	0.037	-1	AKT1,PDGFC,PIK3R4,RALA
Gαq Signaling	1.09	0.0327	-2	AKT1,GNB3,GNG10,GSK3B,PIK3R4
Agrin Interactions at Neuromuscular Junction	1.08	0.0441	#NUM!	ITGB1,RALA,RRAS
Thrombin Signaling	1.06	0.0296	-2	AKT1,GNB3,GNG10,PIK3R4,RALA,RRAS
Arginine Biosynthesis IV	1.06	0.167	#NUM!	OAT
Adenine and Adenosine Salvage III	1.06	0.167	#NUM!	PNP
Purine Ribonucleosides Degradation to Ribose-1-phosphate	1.06	0.167	#NUM!	PNP
Zymosterol Biosynthesis	1.06	0.167	#NUM!	LBR
NGF Signaling	1.04	0.0354	-2	AKT1,PIK3R4,RALA,RRAS
Apelin Endothelial Signaling Pathway	1.03	0.0351	-2	AKT1,PIK3R4,RALA,RRAS
ERK5 Signaling	1.02	0.0417	#NUM!	AKT1,RALA,RRAS
Erythropoietin Signaling	0.991	0.0305	-1.342	AKT1,GSK3B,PIK3R4,RALA,RRAS
GDNF Family Ligand-Receptor Interactions	0.971	0.0395	#NUM!	PIK3R4,RALA,RRAS
Systemic Lupus Erythematosus In T Cell Signaling Pathway	0.967	0.0278	-0.816	AKT1,HLA-DPA1,HLA-DRB1,PIK3R4,RALA,RRAS
Inhibition of Matrix Metalloproteases	0.955	0.0526	#NUM!	MMP14,TIMP1
Antigen Presentation Pathway	0.955	0.0526	#NUM!	HLA-DPA1,HLA-DRB1
Role of MAPK Signaling in the Pathogenesis of Influenza	0.947	0.0385	#NUM!	AKT1,RALA,RRAS
BEX2 Signaling Pathway	0.947	0.0385	#NUM!	AKT1,GSK3B,PDGFC
Sucrose Degradation V (Mammalian)	0.943	0.125	#NUM!	GALM
Ketolysis	0.943	0.125	#NUM!	ACAT1
Wnt/β-catenin Signaling	0.943	0.0294	0	AKT1,APPL2,GSK3A,GSK3B,ILK
Role of BRCA1 in DNA Damage Response	0.921	0.0375	#NUM!	BABAM2,BRCC3,SMARCC2
Gαi Signaling	0.921	0.032	#NUM!	GNB3,GNG10,RALA,RRAS
Prolactin Signaling	0.91	0.037	#NUM!	PIK3R4,RALA,RRAS
Mechanisms of Viral Exit from Host Cells	0.9	0.0488	#NUM!	SNF8,XPO1
Citrulline Biosynthesis	0.893	0.111	#NUM!	OAT
Heme Biosynthesis II	0.893	0.111	#NUM!	UROS
GDP-glucose Biosynthesis	0.893	0.111	#NUM!	PGM5
Folate Transformations I	0.893	0.111	#NUM!	MTR
Hematopoiesis from Pluripotent Stem Cells	0.883	0.0476	#NUM!	IGHG3,IGHG4
BAG2 Signaling Pathway	0.883	0.0476	#NUM!	CTSB,HSPA5
Oncostatin M Signaling	0.866	0.0465	#NUM!	RALA,RRAS
Gα12/13 Signaling	0.866	0.0305	-2	AKT1,PIK3R4,RALA,RRAS
Molecular Mechanisms of Cancer	0.854	0.0229	#NUM!	AKT1,GSK3A,GSK3B,ITGA3,ITGA5,ITGB1,PIK3R4,RALA,RRAS
Glucose and Glucose-1-phosphate Degradation	0.851	0.1	#NUM!	PGM5
Oleate Biosynthesis II (Animals)	0.851	0.1	#NUM!	ALDH6A1
Primary Immunodeficiency Signaling	0.848	0.0455	#NUM!	IGHG3,IGHG4
iNOS Signaling	0.848	0.0455	#NUM!	LBP,MYD88
IL-23 Signaling Pathway	0.848	0.0455	#NUM!	AKT1,PIK3R4
Communication between Innate and Adaptive Immune Cells	0.845	0.0345	#NUM!	HLA-DRB1,IGHG3,IGHG4
PI3K Signaling in B Lymphocytes	0.842	0.0299	-1	AKT1,LYN,RALA,RRAS
RhoGDI Signaling	0.824	0.0269	#NUM!	GNB3,GNG10,ITGA3,ITGA5,ITGB1
Aryl Hydrocarbon Receptor Signaling	0.818	0.0292	#NUM!	ALDH6A1,HSPB7,MGST2,NFIA
FAT10 Cancer Signaling Pathway	0.818	0.0435	#NUM!	AKT1,GSK3B
Insulin Secretion Signaling Pathway	0.815	0.0251	0.816	AGO3,EIF4G3,GOSR1,LYN,PIK3R4,SEC11A
Assembly of RNA Polymerase I Complex	0.812	0.0909	#NUM!	POLR1C
Ketogenesis	0.812	0.0909	#NUM!	ACAT1
Glycogen Degradation II	0.812	0.0909	#NUM!	PGM5
Purine Nucleotides De Novo Biosynthesis II	0.812	0.0909	#NUM!	GMPS
IL-1 Signaling	0.793	0.0326	#NUM!	GNB3,GNG10,MYD88
Regulation of the Epithelial-Mesenchymal Transition Pathway	0.79	0.0262	#NUM!	AKT1,GSK3B,PIK3R4,RALA,RRAS
Guanosine Nucleotides Degradation III	0.78	0.0833	#NUM!	PNP
UDP-N-acetyl-D-galactosamine Biosynthesis II	0.78	0.0833	#NUM!	GALE
Endocannabinoid Cancer Inhibition Pathway	0.78	0.0282	0	AKT1,GSK3B,PDGFC,PIK3R4
Melanocyte Development and Pigmentation Signaling	0.775	0.0319	#NUM!	PIK3R4,RALA,RRAS
Amyloid Processing	0.762	0.04	#NUM!	AKT1,GSK3B
Amyotrophic Lateral Sclerosis Signaling	0.754	0.0312	#NUM!	PDGFC,PIK3R4,RAB5B
Salvage Pathways of Pyrimidine Ribonucleotides	0.754	0.0312	#NUM!	AK5,AK9,PYCR3
TGF-β Signaling	0.754	0.0312	#NUM!	RALA,RRAS,TFE3
Glycogen Degradation III	0.747	0.0769	#NUM!	PGM5
Cholesterol Biosynthesis I	0.747	0.0769	#NUM!	LBR
Urate Biosynthesis/Inosine 5'-phosphate Degradation	0.747	0.0769	#NUM!	PNP
Mevalonate Pathway I	0.747	0.0769	#NUM!	ACAT1
Cholesterol Biosynthesis II (via 24,25-dihydrolanosterol)	0.747	0.0769	#NUM!	LBR
Cholesterol Biosynthesis III (via Desmosterol)	0.747	0.0769	#NUM!	LBR
UVC-Induced MAPK Signaling	0.747	0.0392	#NUM!	RALA,RRAS
UVA-Induced MAPK Signaling	0.745	0.0309	#NUM!	PIK3R4,RALA,RRAS
p53 Signaling	0.738	0.0306	#NUM!	AKT1,GSK3B,PIK3R4
Apelin Cardiomyocyte Signaling Pathway	0.738	0.0306	#NUM!	AKT1,PIK3R4,PLN
UVB-Induced MAPK Signaling	0.735	0.0385	#NUM!	AKT1,PIK3R4
Lymphotoxin β Receptor Signaling	0.721	0.0377	#NUM!	AKT1,PIK3R4
PKCθ Signaling in T Lymphocytes	0.721	0.0267	-2	HLA-DRB1,PIK3R4,RALA,RRAS
Leukotriene Biosynthesis	0.719	0.0714	#NUM!	MGST2
Phenylalanine Degradation IV (Mammalian, via Side Chain)	0.719	0.0714	#NUM!	MAOA
Colanic Acid Building Blocks Biosynthesis	0.719	0.0714	#NUM!	GALE
eNOS Signaling	0.708	0.0263	0	AKT1,HSPA5,PDGFC,PIK3R4
PPAR Signaling	0.701	0.0294	#NUM!	PDGFC,RALA,RRAS
OX40 Signaling Pathway	0.699	0.0364	#NUM!	HLA-DPA1,HLA-DRB1
EGF Signaling	0.699	0.0364	#NUM!	AKT1,PIK3R4
Telomere Extension by Telomerase	0.693	0.0667	#NUM!	TERF2IP
Superpathway of Citrulline Metabolism	0.693	0.0667	#NUM!	OAT
Adenosine Nucleotides Degradation II	0.693	0.0667	#NUM!	PNP
HOTAIR Regulatory Pathway	0.68	0.0256	-2	AGO3,AKT1,MMP14,PIK3R4
T Cell Receptor Signaling	0.678	0.0286	#NUM!	PIK3R4,RALA,RRAS
HMGB1 Signaling	0.674	0.0255	-2	AKT1,PIK3R4,RALA,RRAS
iCOS-iCOSL Signaling in T Helper Cells	0.67	0.0283	#NUM!	AKT1,HLA-DRB1,PIK3R4
Extrinsic Prothrombin Activation Pathway	0.668	0.0625	#NUM!	F12
Glutaryl-CoA Degradation	0.668	0.0625	#NUM!	ACAT1
Isoleucine Degradation I	0.668	0.0625	#NUM!	ACAT1
MSP-RON Signaling Pathway	0.664	0.0345	#NUM!	F12,PIK3R4
Type I Diabetes Mellitus Signaling	0.662	0.028	#NUM!	HLA-DRB1,HSPD1,MYD88
Role of Osteoblasts, Osteoclasts and Chondrocytes in Rheumatoid Arthritis	0.662	0.0235	#NUM!	AKT1,GSK3B,ITGA5,MMP14,PIK3R4
Xenobiotic Metabolism Signaling	0.658	0.0223	#NUM!	ALDH6A1,MAOA,MGST2,PIK3R4,RALA,RRAS
3-phosphoinositide Biosynthesis	0.65	0.0248	-1	MDP1,NUDT5,PIK3R4,PTPN1
Osteoarthritis Pathway	0.646	0.0231	-0.447	ITGA3,ITGA5,ITGB1,PDGFC,SDC4
RAN Signaling	0.644	0.0588	#NUM!	XPO1
Putrescine Degradation III	0.644	0.0588	#NUM!	MAOA
Superpathway of Geranylgeranyldiphosphate Biosynthesis I (via Mevalonate)	0.644	0.0588	#NUM!	ACAT1
Senescence Pathway	0.644	0.0221	-2.449	AKT1,PIK3R4,RALA,RRAS,SAA1,STING1
Purine Nucleotides Degradation II (Aerobic)	0.622	0.0556	#NUM!	PNP
FAT10 Signaling Pathway	0.622	0.0556	#NUM!	UBA6
Sphingosine-1-phosphate Signaling	0.609	0.0263	#NUM!	AKT1,PDGFC,PIK3R4
Role of PKR in Interferon Induction and Antiviral Response	0.602	0.0261	#NUM!	HSPA5,MYD88,PDGFC
Tryptophan Degradation X (Mammalian, via Tryptamine)	0.602	0.0526	#NUM!	MAOA
Valine Degradation I	0.602	0.0526	#NUM!	ALDH6A1
DNA damage-induced 14-3-3σ Signaling	0.602	0.0526	#NUM!	AKT1
Apelin Muscle Signaling Pathway	0.602	0.0526	#NUM!	AKT1
CD28 Signaling in T Helper Cells	0.595	0.0259	#NUM!	AKT1,HLA-DRB1,PIK3R4
Renin-Angiotensin Signaling	0.588	0.0256	#NUM!	PIK3R4,RALA,RRAS
Th1 Pathway	0.588	0.0256	#NUM!	HLA-DPA1,HLA-DRB1,PIK3R4
Endoplasmic Reticulum Stress Pathway	0.564	0.0476	#NUM!	HSPA5
Neuroinflammation Signaling Pathway	0.561	0.0206	-1.633	AKT1,CRP,GSK3B,HLA-DRB1,MYD88,PIK3R4
PPARα/RXRα Activation	0.548	0.0223	2	APOA1,APOA2,RALA,RRAS
Glutathione Redox Reactions I	0.547	0.0455	#NUM!	MGST2
CDP-diacylglycerol Biosynthesis I	0.547	0.0455	#NUM!	MBOAT7
Small Cell Lung Cancer Signaling	0.539	0.0282	#NUM!	AKT1,PIK3R4
Dopamine Degradation	0.532	0.0435	#NUM!	MAOA
Tryptophan Degradation III (Eukaryotic)	0.532	0.0435	#NUM!	ACAT1
Apelin Cardiac Fibroblast Signaling Pathway	0.532	0.0435	#NUM!	AKT1
Ephrin B Signaling	0.53	0.0278	#NUM!	GNB3,GNG10
Synaptic Long Term Depression	0.527	0.0219	#NUM!	LYN,RALA,RRAS,SMARCC2
Leptin Signaling in Obesity	0.521	0.0274	#NUM!	AKT1,PIK3R4
IL-22 Signaling	0.516	0.0417	#NUM!	AKT1
Tumoricidal Function of Hepatic Natural Killer Cells	0.516	0.0417	#NUM!	LYVE1
Phosphatidylglycerol Biosynthesis II (Non-plastidic)	0.516	0.0417	#NUM!	MBOAT7
Toll-like Receptor Signaling	0.506	0.0267	#NUM!	LBP,MYD88
Glutathione-mediated Detoxification	0.5	0.04	#NUM!	MGST2
Dopamine Receptor Signaling	0.499	0.0263	#NUM!	MAOA,NCS1
Chemokine Signaling	0.491	0.026	#NUM!	RALA,RRAS
Th2 Pathway	0.491	0.0226	#NUM!	HLA-DPA1,HLA-DRB1,PIK3R4
Xenobiotic Metabolism AHR Signaling Pathway	0.491	0.026	#NUM!	ALDH6A1,MGST2
Superpathway of Inositol Phosphate Compounds	0.48	0.0207	-1	MDP1,NUDT5,PIK3R4,PTPN1
Androgen Signaling	0.479	0.0222	#NUM!	GNB3,GNG10,POLR2I
STAT3 Pathway	0.479	0.0222	#NUM!	IGF2R,RALA,RRAS
D-myo-inositol (1,4,5,6)-Tetrakisphosphate Biosynthesis	0.469	0.0219	#NUM!	MDP1,NUDT5,PTPN1
D-myo-inositol (3,4,5,6)-tetrakisphosphate Biosynthesis	0.469	0.0219	#NUM!	MDP1,NUDT5,PTPN1
Role of p14/p19ARF in Tumor Suppression	0.461	0.0357	#NUM!	PIK3R4
Cardiac β-adrenergic Signaling	0.453	0.0214	#NUM!	GNB3,GNG10,PLN
B Cell Development	0.449	0.0345	#NUM!	HLA-DRB1
Sonic Hedgehog Signaling	0.449	0.0345	#NUM!	GSK3B
BMP signaling pathway	0.449	0.0241	#NUM!	RALA,RRAS
Protein Kinase A Signaling	0.444	0.0182	1.342	FLNC,GNB3,GNG10,GSK3A,GSK3B,PLN,PTPN1
TR/RXR Activation	0.442	0.0238	#NUM!	AKT1,PIK3R4
HIPPO signaling	0.442	0.0238	#NUM!	STK3,YAP1
FGF Signaling	0.442	0.0238	#NUM!	AKT1,PIK3R4
Noradrenaline and Adrenaline Degradation	0.437	0.0333	#NUM!	MAOA
Role of Pattern Recognition Receptors in Recognition of Bacteria and Viruses	0.433	0.0208	#NUM!	MBL2,MYD88,PIK3R4
RANK Signaling in Osteoclasts	0.424	0.023	#NUM!	AKT1,PIK3R4
Inhibition of Angiogenesis by TSP1	0.415	0.0312	#NUM!	AKT1
Role of JAK2 in Hormone-like Cytokine Signaling	0.415	0.0312	#NUM!	PTPN1
Regulation of IL-2 Expression in Activated and Anergic T Lymphocytes	0.411	0.0225	#NUM!	RALA,RRAS
IL-9 Signaling	0.405	0.0303	#NUM!	PIK3R4
3-phosphoinositide Degradation	0.401	0.0199	#NUM!	MDP1,NUDT5,PTPN1
D-myo-inositol-5-phosphate Metabolism	0.397	0.0197	#NUM!	MDP1,NUDT5,PTPN1
CCR5 Signaling in Macrophages	0.394	0.0217	#NUM!	GNB3,GNG10
Necroptosis Signaling Pathway	0.393	0.0196	#NUM!	SLC25A4,SLC25A5,SLC25A6
Fcγ Receptor-mediated Phagocytosis in Macrophages and Monocytes	0.388	0.0215	#NUM!	AKT1,LYN
Coagulation System	0.385	0.0286	#NUM!	F12
IL-17A Signaling in Fibroblasts	0.385	0.0286	#NUM!	GSK3B
Superpathway of Methionine Degradation	0.385	0.0286	#NUM!	MTR
Nucleotide Excision Repair Pathway	0.385	0.0286	#NUM!	POLR2I
GABA Receptor Signaling	0.383	0.0213	#NUM!	AP2B1,AP2M1
Granulocyte Adhesion and Diapedesis	0.372	0.019	#NUM!	ITGB1,MMP14,SDC4
tRNA Charging	0.359	0.0263	#NUM!	HARS2
Apoptosis Signaling	0.357	0.0202	#NUM!	RALA,RRAS
Triacylglycerol Degradation	0.342	0.025	#NUM!	ABHD12
Th1 and Th2 Activation Pathway	0.336	0.018	#NUM!	HLA-DPA1,HLA-DRB1,PIK3R4
Intrinsic Prothrombin Activation Pathway	0.334	0.0244	#NUM!	F12
Triacylglycerol Biosynthesis	0.334	0.0244	#NUM!	MBOAT7
Antioxidant Action of Vitamin C	0.333	0.0192	#NUM!	NXN,TXNRD2
Serotonin Receptor Signaling	0.327	0.0238	#NUM!	MAOA
GNRH Signaling	0.326	0.0176	#NUM!	GNB3,RALA,RRAS
Gαs Signaling	0.323	0.0189	#NUM!	GNB3,GNG10
Apelin Pancreas Signaling Pathway	0.32	0.0233	#NUM!	PIK3R4
Graft-versus-Host Disease Signaling	0.312	0.0227	#NUM!	HLA-DRB1
Neuroprotective Role of THOP1 in Alzheimer's Disease	0.31	0.0183	#NUM!	C1R,SERPINA3
Xenobiotic Metabolism PXR Signaling Pathway	0.305	0.017	#NUM!	ALDH6A1,MAOA,MGST2
Ephrin A Signaling	0.292	0.0213	#NUM!	PIK3R4
Stearate Biosynthesis I (Animals)	0.287	0.0208	#NUM!	MBOAT7
Endothelin-1 Signaling	0.283	0.0164	#NUM!	PIK3R4,RALA,RRAS
Cholecystokinin/Gastrin-mediated Signaling	0.277	0.0171	#NUM!	RALA,RRAS
IL-15 Production	0.274	0.0169	#NUM!	LYN,ROR2
Assembly of RNA Polymerase II Complex	0.274	0.02	#NUM!	POLR2I
Phototransduction Pathway	0.268	0.0196	#NUM!	GNB3
Inhibition of ARE-Mediated mRNA Degradation Pathway	0.26	0.0164	#NUM!	AGO3,AKT1
RAR Activation	0.256	0.0156	#NUM!	AKT1,RPL7A,SMARCC2
Role of IL-17A in Arthritis	0.253	0.0185	#NUM!	PIK3R4
Serotonin Degradation	0.247	0.0182	#NUM!	MAOA
Unfolded protein response	0.247	0.0182	#NUM!	HSPA5
SPINK1 Pancreatic Cancer Pathway	0.247	0.0182	#NUM!	CTSB
Synaptic Long Term Potentiation	0.246	0.0159	#NUM!	RALA,RRAS
Cellular Effects of Sildenafil (Viagra)	0.246	0.0159	#NUM!	MYH13,MYH3
Glutamate Receptor Signaling	0.242	0.0179	#NUM!	GNB3
Semaphorin Signaling in Neurons	0.237	0.0175	#NUM!	ITGB1
Superpathway of Melatonin Degradation	0.237	0.0175	#NUM!	MAOA
Iron homeostasis signaling pathway	0.23	0.0153	#NUM!	HPX,TF
Adipogenesis pathway	0.227	0.0152	#NUM!	AKT1,CTBP2
Calcium-induced T Lymphocyte Apoptosis	0.223	0.0167	#NUM!	HLA-DRB1
PCP pathway	0.223	0.0167	#NUM!	ROR2
Wnt/Ca+ pathway	0.219	0.0164	#NUM!	GSK3B
PXR/RXR Activation	0.21	0.0159	#NUM!	AKT1
CD40 Signaling	0.207	0.0156	#NUM!	PIK3R4
Cell Cycle: G1/S Checkpoint Regulation	0.199	0.0152	#NUM!	GSK3B
IL-10 Signaling	0	0.0143	#NUM!	LBP
Hepatic Cholestasis	0	0.0111	#NUM!	LBP,MYD88
VDR/RXR Activation	0	0.013	#NUM!	IGFBP5
Airway Pathology in Chronic Obstructive Pulmonary Disease	0	0.00885	#NUM!	ORM1
T Helper Cell Differentiation	0	0.0145	#NUM!	HLA-DRB1
Neuropathic Pain Signaling In Dorsal Horn Neurons	0	0.01	#NUM!	PIK3R4
Factors Promoting Cardiogenesis in Vertebrates	0	0.0069	#NUM!	GSK3B
Corticotropin Releasing Hormone Signaling	0	0.00709	#NUM!	SMARCC2
Growth Hormone Signaling	0	0.0141	#NUM!	PIK3R4
CREB Signaling in Neurons	0	0.0137	-2.236	AKT1,GNB3,GNG10,IGF2R,PIK3R4,POLR2I,RALA,RRAS
Basal Cell Carcinoma Signaling	0	0.0143	#NUM!	GSK3B
Type II Diabetes Mellitus Signaling	0	0.0143	#NUM!	AKT1,PIK3R4
Crosstalk between Dendritic Cells and Natural Killer Cells	0	0.0112	#NUM!	HLA-DRB1
RhoA Signaling	0	0.00826	#NUM!	SEPTIN4
Altered T Cell and B Cell Signaling in Rheumatoid Arthritis	0	0.012	#NUM!	HLA-DRB1
Breast Cancer Regulation by Stathmin1	0	0.0138	-1.134	GNB3,GNG10,PDGFC,PIK3R4,RALA,RRAS,TUBB3,TUBB6
Role of Wnt/GSK-3β Signaling in the Pathogenesis of Influenza	0	0.0135	#NUM!	GSK3B
Cyclins and Cell Cycle Regulation	0	0.0125	#NUM!	GSK3B
Sperm Motility	0	0.00939	#NUM!	LYN,ROR2
Death Receptor Signaling	0	0.011	#NUM!	HSPB7
p38 MAPK Signaling	0	0.00847	#NUM!	HSPB7
Hypoxia Signaling in the Cardiovascular System	0	0.0139	#NUM!	AKT1
G-Protein Coupled Receptor Signaling	0	0.0148	#NUM!	AKT1,PIK3R4,RALA,RRAS
GPCR-Mediated Nutrient Sensing in Enteroendocrine Cells	0	0.00901	#NUM!	GNG10
Gustation Pathway	0	0.0132	#NUM!	GNAT3,GNB3
Sumoylation Pathway	0	0.0099	#NUM!	CTBP2
Th17 Activation Pathway	0	0.0114	#NUM!	MYD88
NER Pathway	0	0.0098	#NUM!	POLR2I
Endocannabinoid Neuronal Synapse Pathway	0	0.00787	#NUM!	GNB3
Apelin Adipocyte Signaling Pathway	0	0.0127	#NUM!	MGST2
White Adipose Tissue Browning Pathway	0	0.00781	#NUM!	CTBP2
Xenobiotic Metabolism CAR Signaling Pathway	0	0.0117	#NUM!	ALDH6A1,MGST2
Regulation Of The Epithelial Mesenchymal Transition In Development Pathway	0	0.012	#NUM!	GSK3B
Calcium Signaling	0	0.0101	#NUM!	MYH13,MYH3

## Sheet: Sheet1
Ingenuity Canonical Pathways	-log(p-value)	Ratio	z-score	Molecules
EIF2 Signaling	10.1	0.0943	-1.941	AGO3,AKT1,EIF1AX,EIF1AY,EIF4G3,EIF5B,GSK3B,HSPA5,PIK3R4,RALA,RPL18A,RPL32,RPL34,RPL38,RPL6,RPL7A,RPS16,RPS26,RPS7,RRAS
Acute Phase Response Signaling	9.61	0.101	-2.121	AHSG,AKT1,APOA1,APOA2,C1R,CRP,HPX,HRG,ITIH2,LBP,MBL2,MYD88,ORM1,RALA,RRAS,SAA1,SERPINA3,TF
Regulation of eIF4 and p70S6K Signaling	6.77	0.0864	-2.646	AGO3,AKT1,EIF1AX,EIF1AY,EIF4G3,ITGA3,ITGA5,ITGB1,PIK3R4,RALA,RPS16,RPS26,RPS7,RRAS
FXR/RXR Activation	4.7	0.08	#NUM!	AHSG,AKT1,APOA1,APOA2,APOF,FETUB,HPX,ORM1,SAA1,TF
Oxidative Phosphorylation	4.56	0.0865	-2.333	ATP5F1A,ATP5F1E,ATP5PF,COX5B,MT-ND3,NDUFB11,NDUFB3,NDUFB7,NDUFV1
Mitochondrial Dysfunction	4.37	0.0667	#NUM!	ATP5F1A,ATP5F1E,ATP5PF,COX5B,MAOA,MT-ND3,NDUFB11,NDUFB3,NDUFB7,NDUFV1,TXNRD2
Role of NFAT in Regulation of the Immune Response	4.12	0.0625	-0.707	AKT1,GNB3,GNG10,GSK3A,GSK3B,HLA-DRB1,LYN,PIK3R4,RALA,RRAS,XPO1
LXR/RXR Activation	4.04	0.0744	1.667	AHSG,APOA1,APOA2,APOF,HPX,LBP,ORM1,SAA1,TF
Sirtuin Signaling Pathway	3.97	0.0495	1.134	AKT1,ATP5F1A,ATP5F1E,ATP5PF,GSK3B,MT-ND3,NDUFB11,NDUFB3,NDUFB7,NDUFV1,POLR1C,SLC25A4,SLC25A5,SLC25A6
