# Supplementary material for: Aorta smooth muscle-on-a-chip reveals impaired mitochondrial dynamics as a therapeutic target for aortic aneurysm in bicuspid aortic valve disease
Source: eLife journal article supplement (doi:10.7554/elife.69310), 2021-09-06
Supplement: supp [file Figure 2-source data 1.xlsx]

## Sheet: 6 mm 15kpa
Time (s)	Stretching Amplitude (mm) Top	Stretching Amplitude (mm) Bottom
1.38
1.41	0	0
1.44
1.47	0	0
1.5
1.53	0	0
1.56
1.59	0	0
1.62
1.65	0	0
1.68
1.71	0.21645	0.668836			TOP	18.1277		16.2157		16.5945		18.9394		16.7569
1.74
1.77	2.05628	6.07375				18.9935		17.6407		16.9553		18.3983		17.4423
1.8
1.83	2.68759	6.56182				17.4062		18.0014		16.6486		17.5505		17.1717
1.86
1.89	9.77633	10.9725				17.8391		17.2619		15.7468		15.8009		16.3961
1.92
1.95	12.1392	12.2379				18.0916		17.2799		16.4863		17.6723		16.9417
1.98
2.01	18.0916	18.2755			AVERAGE	17.2944
2.04					SD	0.623693
2.07	18.1277	18.6732
2.1
2.13	18.9935	17.5343
2.16					BOTTOM	18.2755		16.504		15.5098		16.1063		18.3839
2.19	17.4062	17.7332
2.22						18.6732		17.5163		16.3232		15.5098		17.6247
2.25	17.8391	18.0043
2.28						17.5343		18.2755		17.227		18.4743		17.0101
2.31	18.5065	18.7455
2.34						17.7332		18.6551		16.5221		16.7209		16.3594
2.37	16.7388	10.8641
2.4						18.0043		16.7209				17.2632
2.43	0.595238	2.81996
2.46
2.49	0.450938	1.57267
2.52						18.0441		17.5343		16.3955		16.8149		17.3445
2.55	0.595238	0.126537
2.58					AVERAGE	17.2267
2.61	0.577201	0.27115			SD	0.639753
2.64
2.67	0.577201	0.27115
2.7
2.73	0.577201	0.27115
2.76
2.79	0.577201	0.27115
2.82
2.85	0.577201	0.27115
2.88
2.91	0.577201	0.27115
2.94
2.97	3.62554	4.79031
3
3.03	8.35137	10.8641
3.06
3.09	10.3355	12.3644
3.12
3.15	11.9949	12.4367
3.18
3.21	12.5722	15.0578
3.24
3.27	13.3838	14.9132
3.3
3.33	15.0433	16.504
3.36
3.39	16.2157	17.5163
3.42
3.45	17.6407	18.2755
3.48
3.51	18.0014	18.6551
3.54
3.57	17.2619	16.7209
3.6
3.63	9.70418	6.94143
3.66
3.69	3.71573	2.49458
3.72
3.75	0.4329	1.53651
3.78
3.81	0.306638	0.921909
3.84
3.87	0.306638	0.921909
3.9
3.93	0.306638	0.921909
3.96
3.99	0.306638	0.921909
4.02
4.05	0.306638	0.921909
4.08
4.11	0.306638	0.921909
4.14
4.17	0.306638	0.921909
4.2
4.23	0.793651	1.66305
4.26
4.29	3.69769	5.71222
4.32
4.35	6.42136	9.09255
4.38
4.41	8.26118	8.89371
4.44
4.47	8.82035	11.6775
4.5
4.53	10.4076	12.5633
4.56
4.59	13.0231	12.1837
4.62
4.65	13.8528	15.5098
4.68
4.71	16.5945	16.3232
4.74
4.77	16.9553	17.227
4.8
4.83	16.6486	16.5221
4.86
4.89	15.7468	9.38178
4.92
4.95	3.82395	3.3261
4.98
5.01	3.57143	1.87997
5.04
5.07	0.559163	0.198843
5.1
5.13	0.162338	0.144613
5.16
5.19	0.162338	0.144613
5.22
5.25	0.162338	0.144613
5.28
5.31	0.162338	0.144613
5.34
5.37	0.162338	0.144613
5.4
5.43	0.162338	0.144613
5.46
5.49	0.955988	1.59074
5.52
5.55	3.95022	4.13955
5.58
5.61	5.57359	8.85756
5.64
5.67	7.52165	9.5987
5.7
5.73	8.82035	13.2683
5.76
5.79	9.72222	13.3948
5.82
5.85	12.3016	16.1063
5.88
5.91	14.1955	15.5098
5.94
5.97	18.9394	18.4743
6
6.03	18.3983	16.7209
6.06
6.09	17.5505	17.2632
6.12
6.15	15.8009	11.081
6.18
6.21	8.6039	3.41649
6.24
6.27	6.51154	2.25958
6.3
6.33	1.2987	1.57267
6.36
6.39	0.162338	0.21692
6.42
6.45	0.162338	0.21692
6.48
6.51	0.162338	0.21692
6.54
6.57	0.162338	0.21692
6.6
6.63	0.162338	0.21692
6.66
6.69	0.162338	0.21692
6.72
6.75	0.757576	0.921909
6.78
6.81	2.34488	3.83225
6.84
6.87	4.34704	10.9183
6.9
6.93	6.13276	12.3463
6.96
6.99	8.92857	16.2328
7.02
7.05	10.5159	14.7505
7.08
7.11	11.8687	14.9132
7.14
7.17	16.7569	18.3839
7.2
7.23	17.4423	17.6247
7.26
7.29	17.1717	17.0101
7.32
7.35	16.3961	16.3594
7.38
7.41	9.19913	5.54953
7.44
7.47	1.2987	0.289226
7.5
7.53	0.992063	0.958062
7.56
7.59	0.252525	0.0180766
7.62
7.65	0.252525	0.0180766
7.68
7.71	0.252525	0.0180766
7.74
7.77	0.252525	0.0180766
7.8
7.83	0.252525	0.0180766
7.86
7.89
7.92
7.95
7.98
8.01
8.04
8.07
8.1
8.13
8.16
8.19
8.22
8.25
8.28
8.31
8.34
8.37
8.4
8.43
8.46
8.49
8.52
8.55
8.58
8.61
8.64
8.67
8.7
8.73
8.76
8.79
8.82
8.85
8.88
8.91
8.94
8.97
9
9.03
9.06
9.09
9.12
9.15
9.18
9.21
9.24
9.27
9.3
9.33
9.36
9.39
9.42
9.45
9.48
9.51
9.54
9.57
9.6
9.63
9.66
9.69
9.72
9.75
9.78
9.81
9.84
9.87
9.9
9.93
9.96
9.99
10.02
10.05
10.08
10.11
10.14
10.17
10.2
10.23
10.26
10.29
10.32
10.35
10.38
10.41
10.44
10.47
10.5
10.53
10.56
10.59
10.62
10.65
10.68
10.71
10.74
10.77
10.8
10.83
10.86
10.89
10.92
10.95
10.98
11.01
11.04
11.07
11.1
11.13
11.16
11.19
11.22
11.25
11.28
11.31
11.34
11.37
11.4
11.43
11.46
11.49
11.52
11.55
11.58
11.61
11.64
11.67
11.7

## Sheet: 6 mm 10 kpa
Time（s）	Stretching amplitude (Top)	Stretching amplitude (Bottom)
0.72
0.75	0	0
0.78
0.81	0	0
0.84
0.87	0	0
0.9
0.93	0	0
0.96
0.99	0	0
1.02
1.05	0.216489	0.885916
1.08
1.11	1.33502	3.25438
1.14
1.17	1.87624	4.57422
1.2
1.23	6.33231	6.65341
1.26
1.29	7.77557	7.25005			Bottom	6.65341		7.88284		6.54493		7.75628		7.35852
1.32
1.35	6.65704	8.15404				7.25005		7.97324		6.76189		7.08733		7.15965
1.38
1.41	7.05394	7.25005				8.15404		6.74381		6.74381		6.65341		7.44892
1.44
1.47	7.27043	7.6478				7.25005		7.32236		6.97885		7.25005		7.75628
1.5
1.53	6.90962	7.93708				7.6478		6.41837		7.12349		7.59356		7.30428
1.56
1.59	5.5746	5.94829				7.93708		7.88284		6.68957		7.15965		7.70204
1.62
1.65	6.89157	6.79805				7.48207		7.37058		6.80709		7.25005		7.45495
1.68					AVERAGE	7.27295
1.71	6.42251	6.16525			SD	0.275654
1.74
1.77	3.26538	1.46447
1.8					TOP
1.83	0.93812	0.596637
1.86						7.77557		6.99982		7.34259		6.65704		6.53076
1.89	0.0721631	0.560477
1.92						6.65704		7.46888		6.67509		7.37868		7.55908
1.95	0.0721631	0.0180799
1.98						7.05394		7.39672		6.9457		7.48692		7.48692
2.01	0.0721631	0.0180799
2.04						7.27043		7.4328		6.62096		7.37868		6.89157
2.07	0.0721631	0.0180799
2.1						6.90962		6.35035		6.26015		7.36064		7.28847
2.13	0.0721631	0.0180799
2.16						7.13332		7.12971		6.7689		7.25239		7.15136
2.19	0.0721631	0.0180799
2.22					AVERAGE	7.08714
2.25	0.432979	0.451998			SD	0.184835
2.28
2.31	0.649468	0.813596
2.34
2.37	3.13909	4.48382
2.4
2.43	4.54627	6.32797
2.46
2.49	5.77305	7.88284
2.52
2.55	6.99982	7.97324
2.58
2.61	7.46888	6.74381
2.64
2.67	7.39672	7.32236
2.7
2.73	7.4328	6.41837
2.76
2.79	6.35035	7.88284
2.82
2.85	5.30399	5.15278
2.88
2.91	5.82717	5.65901
2.94
2.97
3
3.03	5.44831	1.31983
3.06
3.09	2.50767	1.15711
3.12
3.15	2.50767	1.15711
3.18
3.21	2.50767	1.15711
3.24
3.27	0.162367	0.596637
3.3
3.33	0.162367	0.596637
3.36
3.39	0.162367	0.596637
3.42
3.45	0.162367	0.596637
3.48
3.51	0.162367	0.596637
3.54
3.57	0.162367	0.596637
3.6
3.63	0.162367	0.596637
3.66
3.69	0.162367	0.596637
3.72
3.75	4.16742	3.48942
3.78
3.81	5.64676	4.97198
3.84
3.87	6.16994	6.54493
3.9
3.93	7.34259	6.76189
3.96
3.99	6.67509	6.74381
4.02
4.05	6.9457	6.97885
4.08
4.11	6.62096	7.12349
4.14
4.17	6.26015	6.68957
4.2
4.23
4.26
4.29	5.10554	2.53119
4.32
4.35	3.40971	0.235039
4.38
4.41	1.02832	0.235039
4.44
4.47	0.451019	0.235039
4.5
4.53	0.451019	0.235039
4.56
4.59	0.451019	0.235039
4.62
4.65	0.451019	0.235039
4.68
4.71	0.451019	0.235039
4.74
4.77	0.451019	0.235039
4.8
4.83	0.451019	0.235039
4.86
4.89	0.451019	0.235039
4.92
4.95	2.99477	4.10414
4.98
5.01	4.14938	6.03869
5.04
5.07	6.78333	7.59356
5.1
5.13	6.65704	8.20828
5.16
5.19	7.37868	7.75628
5.22
5.25	7.48692	7.08733
5.28
5.31	7.37868	6.65341
5.34
5.37	7.36064	7.25005
5.4
5.43	6.65704	7.59356
5.46
5.49	7.01786	7.15965
5.52
5.55	3.24734	3.48942
5.58
5.61	1.87624	2.07919
5.64
5.67	0.396897	0.903996
5.7
5.73	0.396897	0.903996
5.76
5.79	0.396897	0.903996
5.82
5.85	0.396897	0.903996
5.88
5.91	0.396897	0.903996
5.94
5.97	0.396897	0.903996
6
6.03	0.396897	0.903996
6.06
6.09	0.396897	0.903996
6.12
6.15	1.44326	2.13343
6.18
6.21	3.24734	3.99566
6.24
6.27	3.98701	5.42397
6.3
6.33	5.5746	6.70765
6.36
6.39	6.92766	7.35852
6.42
6.45	6.53076	7.15965
6.48
6.51	7.55908	7.44892
6.54
6.57	7.48692	7.75628
6.6
6.63	6.89157	7.30428
6.66
6.69	7.28847	7.70204
6.72
6.75	7.01786	6.99693
6.78
6.81	2.63395	2.00687
6.84
6.87	0.847916	1.04863
6.9
6.93	2.20097	0.216959
6.96
6.99	0.324734	0.216959
7.02
7.05	0.324734	0.216959
7.08
7.11	0.324734	0.216959
7.14
7.17	0.324734	0.216959
7.2
7.23	0.324734	0.216959
7.26
7.29	0.324734	0.216959
7.32
7.35	0.324734	0.216959
7.38
7.41	0.324734	0.216959
