# Supplementary material for: Aorta smooth muscle-on-a-chip reveals impaired mitochondrial dynamics as a therapeutic target for aortic aneurysm in bicuspid aortic valve disease
Source: eLife journal article supplement (doi:10.7554/elife.69310), 2021-09-06
Supplement: supp [file Figure 3-source data 1.xlsx]

## Sheet: static
									长度
1	246	134.572	193.373	4	249.466	29.6	33104.8	33104.8	244.969	2.20086
2	112	102.395	200.92	4.45	218.933	-58.595	11468.2	11468.2	111.306
3	274	82.114	33.1	7.16	211.489	27.69	22499.1	22499.1	273.3	2.91008
4	95	106.932	192.301	7.695	202.579	-63.435	10158.5	10158.5	93.915
5	241	92.759	74.194	2.37	249.175	61.942	22355	22355	240.235	1.80181
6	134	104.086	74.95	8.575e-11	227.067	-24.835	13947.6	13947.6	133.33
7	238	59.987	53.66	3	201	-17.21	14276.8	14276.8	236.592	2.0976
8	114	92.511	74.251	0	219.749	-104.899	10546.3	10546.3	112.792
9	189	81.121	47.126	0	225.499	-94.89	15331.8	15331.8	187.683	1.59048
10	119	73.619	61.655	0	223.881	-0.486	8760.71	8760.71	118.004
11	226	60.587	10.988	0	225.031	-22.463	13692.7	13692.7	225.078	1.26186
12	179	93.955	254.506	2	255	-120.303	16817.9	16817.9	178.37
13	348	64.223	14.443	0	255	51.314	22349.7	22349.7	347.174	2.71346
14	129	62.124	13.231	2.375	224.703	-21.552	8013.98	8013.98	127.945
15	251	85.398	6.886	2	229.438	61.793	21434.8	21434.8	249.648	1.93045
16	130	62.544	94.366	4.157	217	-31.724	8130.72	8130.72	129.321
17	245	87.961	254.504	1	255	-116.039	21550.4	21550.4	243.742	1.52232
18	161	72.176	254.506	2	255	-25.925	11620.4	11620.4	160.112
19	324	65.089	21.412	6.841	232.915	44.875	21088.7	21088.7	323.149	2.60191
20	125	56.512	31.255	0.389	216.874	-49.899	7063.99	7063.99	124.197
21	303	56.231	38.462	0.003	237.248	-74.445	17037.8	17037.8	302.063	2.52026
22	121	82.464	57.845	4	205.231	35.149	9978.11	9978.11	119.854
23	416	78.14	254.506	2	255	-143.13	32506.4	32506.4	415	4.23448
24	99	69.153	13.523	2	238	-61.343	6846.11	6846.11	98.005
25	296	115.054	173.911	1.781	218.319	42.117	34056	34056	295.237	2.08177
26	143	94.939	48.851	3.109	199.914	-52.16	13576.2	13576.2	141.82
27	257	99.351	254.504	1	255	46.266	25533.3	25533.3	256.035	1.38198
28	186	81.289	53.838	1	240.405	-44.563	15119.8	15119.8	185.267
29	256	104.455	54.082	1	255	23.346	26740.5	26740.5	254.867	1.83391
30	140	60.053	52.92	4.093	200.94	-57.339	8407.39	8407.39	138.975
31	244	82.107	68.965	1	255	-130.167	20034.2	20034.2	243.403	2.13701
32	115	86.825	179.399	3	191.551	-43.221	9984.93	9984.93	113.899
33	329	79.735	201.564	1.171	219.008	53.06	26232.7	26232.7	327.8	2.45718
34	134	79.482	20.207	3.054	217.251	-37.385	10650.6	10650.6	133.405
35	283	61.836	19.179	0	239.499	-105.862	17499.5	17499.5	281.727	1.97325
36	144	74.308	67.015	1.034	216.209	-11.31	10700.4	10700.4	142.773
37	282	79.039	13.45	1	237.081	-109.791	22289.1	22289.1	280.573	4.86211
38	59	46.159	29.722	13	158.111	-27.897	2723.39	2723.39	57.706
39	204	80.5	42.517	0	229.143	48.788	16422	16422	203.384	2.53875
40	81	64.856	29.022	0	221.779	-65.674	5253.3	5253.3	80.112
41	218	54.528	11.933	2.287	217	-128.825	11887.1	11887.1	216.926	2.51611
42	87	61.624	28.084	7.261	161.773	-52.067	5361.28	5361.28	86.215
43	273	64.63	16.776	3.651	220.411	-171.751	17644	17644	271.812	2.56448
44	107	56.041	8.211	2.025	245.635	-76.357	5996.34	5996.34	105.991
45	259	92.92	201.321	1	235.701	21.389	24066.3	24066.3	257.752	3.36078
46	78	47.011	33.918	6.47	253.025	-67.782	3666.84	3666.84	76.694
47	174	149.641	149.799	42.103	255	-70.102	26037.6	26037.6	173.349	1.76327
48	99	95.402	147.908	5.124	196	-9.367	9444.76	9444.76	98.311
49	177	129.634	146.712	14.363	245.634	45.23	22945.2	22945.2	176.071	3.27184
50	55	73.228	119.326	5	204.778	-48.013	4027.52	4027.52	53.814
51	277	128.059	147.793	6.179	199.53	-125.997	35472.5	35472.5	275.632	4.67982
52	60	52.919	5.367	5	192.783	-40.179	3175.14	3175.14	58.898
53	346	132.953	147.614	0	221.637	-82.999	46001.6	46001.6	344.569	3.64508
54	96	98.555	157.74	13.37	205.363	6.072	9461.31	9461.31	94.53
55	187	128.805	31.916	8.785	232.237	-92.463	24086.6	24086.6	186.172	2.81951
56	67	58.374	14.221	5.667	196.091	1.736	3911.09	3911.09	66.03
57	164	99.658	2.924	0.644	234.078	-13.523	16343.9	16343.9	162.505	2.70243
58	61	79.567	3.473	0	254	-93.814	4853.6	4853.6	60.133
59	237	108.722	149.071	6	213.514	-39.153	25767.1	25767.1	235.987	2.20895
60	108	87.502	10.246	5	249.182	54.525	9450.19	9450.19	106.832
61	243	102.407	1.494	0	255	-3.547	24884.8	24884.8	242.464	1.83806
62	133	87.1	155.588	1	196.43	-109.946	11584.2	11584.2	131.913
63	331	118.977	133.777	3	199.358	-93.305	39381.3	39381.3	329.548	2.05947
64	161	97.909	133.831	3	174.318	-6.459	15763.3	15763.3	160.016
65	299	114.345	150.214	0	219.115	-116.307	34189.2	34189.2	297.847	2.56298
66	117	98.558	19.172	5.341	233.767	-37.659	11531.2	11531.2	116.211
67	234	99.039	133.564	3	234.311	-29.318	23175.2	23175.2	232.82	1.70543
68	138	91.251	135.364	1.423	204.918	46.484	12592.6	12592.6	136.517
69	335	131.8	164.034	23	216.591	-55.12	44153	44153	334.001	4.32638
70	78	73.54	7.869	4.442	199.403	36.573	5736.12	5736.12	77.201
71	280	93.637	2.811	0	205.627	178.973	26218.4	26218.4	279.045	1.45304
72	193	99.487	8.646	0	233	-91.193	19200.9	19200.9	192.042
73	199	111.048	136.261	3	212.938	-141.973	22098.6	22098.6	198.04	2.01236
74	99	89.595	48.733	2.429	228.215	-62.133	8869.94	8869.94	98.412
75	327	55.969	60.434	1.59	140.429	-28.372	18301.8	18301.8	326.181	1.84177
76	178	44.1	2.95	1	200.721	51.189	7849.78	7849.78	177.102
77	257	37.329	3.725	1.073	195	-153.034	9593.45	9593.45	255.812	2.65765
78	97	63.844	91.726	2.997	164.667	-60.772	6192.83	6192.83	96.255
79	350	46.499	52.03	0	197.329	25.463	16274.7	16274.7	348.891	3.25455
80	108	53.136	2.719	2.359	186.519	-53.344	5738.68	5738.68	107.201
81	396	43.386	34.804	1.4	150.12	33.851	17180.7	17180.7	394.948	2.83082
82	141	49.07	1.999	1.015	168.962	-56.993	6918.9	6918.9	139.517
83	339	77.617	254.504	1	255	143.537	26312.1	26312.1	338.209	3.81726
84	90	61.371	92.813	1.295	191	53.259	5523.39	5523.39	88.6
85	248	118.841	158.44	3	202.462	48.77	29472.5	29472.5	247.316	2.46662
86	101	122.865	91.193	0	195.36	-51.072	12409.3	12409.3	100.265
87	274	143.331	254.507	2.678	255	-157.187	39272.7	39272.7	273.386	2.48041
88	111	110.729	54.58	3.276	195.011	-78.486	12291	12291	110.218
89	288	88.57	21.665	6.627	255	23.172	25508.1	25508.1	287.167	3.19628
90	91	61.317	16.42	6.071	177	-73.179	5579.89	5579.89	89.844
91	322	107.512	161.597	6	196.133	-104.426	34618.7	34618.7	321.125	2.8846
92	112	120.892	166.119	24	255	-14.036	13539.9	13539.9	111.324
93	242	116.126	173.978	6	246.909	65.772	28102.5	28102.5	241.249	3.01328
94	81	86.784	13.537	10.011	210.609	-27.525	7029.49	7029.49	80.062
95	322	114.849	164.979	2.108	203.048	-138.915	36981.3	36981.3	321.069	3.98235
96	82	105.579	163.299	3.926	255	-43.995	8657.5	8657.5	80.623
97	427	111.214	254.502	0	255	-28.009	47488.3	47488.3	425.883	3.53676
98	121	57.482	62.749	4.263e-13	197.1	57.894	6955.3	6955.3	120.416
99	355	53.285	11.048	0	245.932	-52.451	18916.1	18916.1	354.425	4.30023
100	83	61.467	32.166	3.037	166.926	35.618	5101.78	5101.78	82.42
101	315	41.599	8.191	0.343	236.725	-61.069	13103.6	13103.6	314.212	4.22879
102	75	57.469	64.844	5	213.435	28.98	4310.15	4310.15	74.303
103	538	61.436	4.25	0	241.8	-72.003	33052.5	33052.5	537.287	2.39639
104	225	60.302	53.916	0	244.291	18.193	13567.9	13567.9	224.207
105	272	117.31	153.928	3	218.251	-70.161	31908.3	31908.3	271.089	1.78561
106	153	101.961	150.082	0.753	226.288	29.604	15600.1	15600.1	151.819
107	162	107.614	158.06	0.266	227.845	-108.435	17433.5	17433.5	161.276	2.00937
108	81	73.391	18.048	11	223.275	-30.719	5944.66	5944.66	80.262
109	202	122.581	162.056	2	229.004	-68.41	24761.3	24761.3	201.109	2.41668
110	84	77.963	3.71	2.417	223.152	-147.265	6548.89	6548.89	83.217
111	379	120.915	157.158	13	190	-73.867	45826.7	45826.7	377.881	3.03983
112	125	102.5	22.641	13.381	239.149	19.747	12812.4	12812.4	124.31
113	372	120.813	154.43	11	214.424	-135.982	44942.5	44942.5	371.286	3.88086
114	97	84.072	38.808	11	236.992	-48.814	8155.02	8155.02	95.671
115	407	117.923	141.729	6.243	207.312	-31.496	47994.8	47994.8	405.783	4.29841
116	95	98.628	160.789	0	230.599	-126.384	9369.69	9369.69	94.403
117	107	92.645	47.133	6	186	-64.163	9912.98	9912.98	105.551	2.04461
118	53	57.502	12.032	8.633	202	31.535	3047.59	3047.59	51.624
119	87	73.99	86.807	4.787	229.354	-45.474	6437.14	6437.14	85.563	1.44135
120	60	77.236	42.929	3.797	187.611	32.619	4634.17	4634.17	59.363
121	188	83.619	254.507	2.829	255	-92.755	15720.4	15720.4	187.216	2.53832
122	75	62.087	20.18	4	216.409	-12.529	4656.56	4656.56	73.756
123	446	108.592	254.502	0	255	-47.276	48431.9	48431.9	445.121	2.83545
124	158	75.438	19.16	5	255	34.095	11919.2	11919.2	156.984
125	295	52.812	10.27	4	218	19.483	15579.6	15579.6	293.825	2.34812
126	126	62.51	2.442	2	228.209	-79.408	7876.31	7876.31	125.132
127	208	117.386	202.769	1	225.091	-117.681	24416.3	24416.3	206.652	1.82993
128	114	94.27	28.17	8	227.728	-39.611	10746.8	10746.8	112.929
129	250	121.967	201.864	2	222.065	-119.545	30491.7	30491.7	249.435	4.67641
130	54	75.97	9.73	4	199.596	-30.411	4102.36	4102.36	53.339
131	398	97.96	201.462	1	220.778	57.031	38988.1	38988.1	396.919	5.58098
132	72	66.929	28.726	10.632	226.07	-27.646	4818.91	4818.91	71.12
133	320	57.257	22.366	2.728e-11	216.059	-119.946	18322.1	18322.1	318.523	2.17808
134	147	63.053	44.766	4.23	222.698	153.61	9268.81	9268.81	146.24
1	279	105.846	150.636	1	197.95	-123.861	29531.1	29531.1	278.183	2.83184
2	99	73.203	8.83	3	202	-38.387	7247.11	7247.11	98.234
3	231	132.39	147.269	1	205.06	-70.463	30582.2	30582.2	230.256	2.81679
4	83	76.039	20.27	4.482	201.647	14.886	6311.23	6311.23	81.744
5	246	115.704	2.249	1	214.089	-73.189	28463.1	28463.1	245.491	2.44842
6	101	109.071	92.022	14	220.981	-141.072	11016.1	11016.1	100.265
7	227	134.408	147.779	14.435	214.646	-127.63	30510.7	30510.7	226.02	2.74533
8	83	101.707	30.012	5.765	240	-40.073	8441.7	8441.7	82.329
9	296	54.398	14.402	6	232.407	-89.029	16101.9	16101.9	295.042	4.53855
10	66	56.271	38.647	6.123	211.708	-0.881	3713.88	3713.88	65.008
11	346	66.559	35.129	6.371	247.745	-120.651	23029.3	23029.3	345.232	2.80278
12	124	48.9	9.06	5.512	207.344	-32.4	6063.57	6063.57	123.175
13	226	50.617	10.047	4.111	164.071	-24.402	11439.4	11439.4	225.109	2.71612
14	84	90.221	37.395	15	249	48.424	7578.55	7578.55	82.879
15	230	55.838	69.396	1.905	233.82	45	12842.8	12842.8	229.103	2.37314
16	98	44.526	20.985	0	188.495	-50.042	4363.52	4363.52	96.54

## Sheet: low strain
1	333	161.361	167.982	0	243.645	-91.035	53733.1	53733.1	332.054	2.32115
2	144	144.538	172.349	0.881	251	1.602	20813.4	20813.4	143.056
3	237	131.676	158.238	20.344	234.939	-133.628	31207.2	31207.2	236.241	1.76827
4	135	81.659	31.848	11.917	229.035	-36.784	11024	11024	133.6
5	155	122.063	12.089	2.729	230.939	-124.413	18919.8	18919.8	153.942	1.72588
6	90	75.131	51.68	5	212.825	-42.274	6761.78	6761.78	89.196
7	319	112.438	82.945	5.887	245	60.858	35867.8	35867.8	318.291	3.16069
8	102	103.938	57.162	13.935	220.781	-32.428	10601.6	10601.6	100.703
9	273	97.37	122.406	22.221	240.496	-81.126	26581.9	26581.9	272.259	2.21027
10	124	95.897	60.643	20.704	240.579	7.933	11891.3	11891.3	123.179
11	335	108.837	18.393	2	241.811	-79.465	36460.3	36460.3	333.624	4.41857
12	77	92.408	13.475	2	237	11.459	7115.38	7115.38	75.505
13	364	117.508	75.659	4.401	242.858	-77.42	42772.9	42772.9	362.708	2.48815
14	147	103.083	48.039	8.413	236.374	30.964	15153.2	15153.2	145.774
15	386	118.779	76.049	1	252.143	-100.93	45848.6	45848.6	384.984	2.44761
16	158	138.618	202.623	1	245.045	168.261	21901.7	21901.7	157.29
17	261	114.341	46.33	8.087	249.823	-99.064	29843	29843	260.25	2.20424
18	119	93	76.46	8	212.98	-10.739	11067	11067	118.068
19	340	85.93	5.163	0.191	231.607	-117.169	29216.3	29216.3	339.454	3.7539
20	91	126.418	134.209	1	242	-29.116	11504.1	11504.1	90.427
21	258	84.072	7.889	1	236.159	-142.595	21690.7	21690.7	256.811	3.26732
22	80	108.024	236.542	2.273	237	126.724	8641.88	8641.88	78.6
23	205	102.829	7.271	3	246	-86.074	21080	21080	204.48	3.21509
24	65	105.417	1.414	1	212.825	-16.44	6852.1	6852.1	63.6
25	264	90.573	33.256	1	221.2	60.417	23911.3	23911.3	263.327	3.26267
26	82	78.082	4.674	3.45	212.358	-33.887	6402.73	6402.73	80.709
27	254	118.773	128.944	2	222.323	-97.938	30168.4	30168.4	253.428	2.94725
28	87	74.978	1.412	1	211.767	-8.696	6523.06	6523.06	85.988
29	217	110.682	72.724	5	237.717	-52.706	24018.1	24018.1	216.206	1.16616
30	186	106.408	47.033	9.079	243.2	-140.471	19791.9	19791.9	185.4
31	373	144.717	71.401	14.186	244.849	-31.466	53979.6	53979.6	371.652	4.77536
32	79	62.65	39.184	1	171	62.447	4949.36	4949.36	77.827
33	298	119.262	186.4	0	249.182	-91.736	35540.2	35540.2	297.136	2.03819
34	147	136.509	192.861	4.74	222.162	-18.808	20066.9	20066.9	145.784
35	319	125.793	83.314	0	241	-116.969	40128	40128	317.53	2.91558
36	110	109.55	82.74	5	203.025	-30.332	12050.4	12050.4	108.908
37	335	114.595	5.176	0.24	230	-108.326	38389.5	38389.5	333.937	4.43635
38	76	122.336	134.87	24.578	216	-19.398	9297.53	9297.53	75.273
39	374	132.318	143.623	7.84	228.541	-73.168	49487	49487	372.979	3.06122
40	123	110.646	147.145	4.297	206.896	16.204	13609.5	13609.5	121.84
41	324	131.825	141.577	0	244.066	-67.244	42711.4	42711.4	323.155	2.7468
42	119	119.8	78.404	5.519	213.995	27.872	14256.2	14256.2	117.648
43	359	130.51	148.311	3	237.697	-81.802	46853	46853	357.655	3.30019
44	109	109.699	151.243	3	207.583	4.764	11957.2	11957.2	108.374
45	269	122.774	86.268	3	230.986	-48.171	33026.1	33026.1	268.405	2.8075
46	97	95.074	29.965	8.719	230.724	37.349	9222.14	9222.14	95.603
47	315	133.184	198.332	2.576	231.929	-95.293	41953	41953	314.341	3.76975
48	84	84.034	22.129	6.001	241.933	-22.567	7058.83	7058.83	83.385
49	170	83.823	1.406	1	209	17.899	14249.9	14249.9	169.189	3.35966
50	51	63.238	1.35	1	180	-83.157	3225.12	3225.12	50.359
51	192	134.937	150.556	5.161	234.215	-22.413	25907.9	25907.9	191.463	2.21778
52	87	84.798	150.919	1	224.786	-115.378	7377.45	7377.45	86.331
53	209	96.294	31.661	0	241.947	54.398	20125.5	20125.5	207.851	1.56015
54	134	82.011	104.876	4.09	174.396	-37.988	10989.5	10989.5	133.225
55	199	135.054	1.47	1	241.443	75.683	26875.7	26875.7	198.154	1.93777
56	103	73.499	1.426	1	218.875	-9.002	7570.44	7570.44	102.259
57	235	122.421	45.355	4.237	240.783	-75.667	28769	28769	234.293	2.10317
58	112	111.55	54.38	12.17	230.464	-163.843	12493.6	12493.6	111.4
59	247	96.313	45.24	5.941	232.024	-40.045	23789.2	23789.2	245.577	2.51639
60	99	102.959	25.891	16	236.175	45.83	10193	10193	97.591
61	190	111.206	15.164	12.277	223.387	-118.055	21129.1	21129.1	189.235	1.73348
62	110	114.49	160.396	1	224.591	-24.922	12593.9	12593.9	109.165
63	232	87.504	31.171	5.852	241.549	-100.726	20300.8	20300.8	231.037	2.40952
64	97	73.275	19.883	8	233.341	-7.792	7107.68	7107.68	95.885
65	97	86.845	20.211	2	254	-94.764	8423.92	8423.92	96.333	1.17445
66	83	80.776	68.359	2	250	-178.603	6704.41	6704.41	82.024
67	89	92.38	2.446	2	230.515	-98.499	8221.79	8221.79	87.966	1.02176
68	87	87.527	19.561	2	245	-177.337	7614.84	7614.84	86.093
69	225	114.653	113.838	4.467	233.03	-119.427	25796.9	25796.9	223.886	2.98965
70	76	105.382	73.304	9	216.067	-34.114	8009	8009	74.887
71	238	94.806	37.653	0	226.806	-105.149	22563.9	22563.9	237.245	2.90709
72	83	84.224	15.259	14.911	193.127	-17.103	6990.63	6990.63	81.609
73	165	99.174	60.197	4.493	222.208	159.239	16363.7	16363.7	163.625	1.6047
74	103	119.82	97.003	22.453	228.775	-116.816	12341.4	12341.4	101.966
75	376	136.668	183.578	0	239.165	-115.608	51387.1	51387.1	374.817	1.61762
76	233	146.186	182.746	20.554	242	-27.782	34061.4	34061.4	231.709
77	292	92.397	39.949	4	243.037	-176.251	26979.8	26979.8	290.622	2.34252
78	125	144.665	152.956	5.548	253	-91.848	18083.2	18083.2	124.064
79	165	131.878	182.865	4.694	232.184	13.782	21759.8	21759.8	163.713	1.54385
80	107	119.746	99.464	14	227.452	-69.001	12812.9	12812.9	106.042
81	263	115.024	53.586	1.789	240.71	-13.241	30251.4	30251.4	261.964	3.71028
82	72	102.622	52.715	5.812	238.958	-105.611	7388.81	7388.81	70.605
83	268	134.707	180.862	12.804	241.042	-53.688	36101.6	36101.6	266.813	2.17648
84	124	133.148	86.638	7	251.16	33.69	16510.4	16510.4	122.589
85	250	131.252	192.951	7.121	247.994	118.005	32812.9	32812.9	249.177	2.3498
86	107	131.994	217.286	6.688	248.994	20.999	14123.3	14123.3	106.042
87	317	101.733	70.09	3	239.896	28.509	32249.3	32249.3	316.362	2.22757
88	143	106.315	33.947	9	250	-60.005	15203.1	15203.1	142.021
89	230	104.528	140.568	8.236	234.838	39.677	24041.3	24041.3	228.674	2.01539
90	114	108.602	24.174	6.35	253	-55.049	12380.7	12380.7	113.464
91	182	123.101	93.928	0	227.921	-96.654	22404.4	22404.4	181.221	1.69537
92	108	102.446	37.877	8	236.313	152.716	11064.2	11064.2	106.892
93	162	103.494	49.119	0	249	-90	16766	16766	161	2.00251
94	81	86.236	21.111	0	240.2	5.711	6985.1	6985.1	80.399
95	439	138.008	180.356	12.251	252	-129.437	60585.7	60585.7	437.639	3.41303
96	129	110.749	154.216	5.233	230.246	-38.032	14286.7	14286.7	128.226
97	443	139.246	181.039	7	240.879	-124.769	61685.8	61685.8	441.897	3.08898
98	144	95.003	29.291	11.335	215.627	-38.472	13680.4	13680.4	143.056
99	470	99.096	73.629	5.03	237.631	-112.028	46575.1	46575.1	469.256	4.40562
100	108	102.612	38.848	7	236.663	-24.399	11082.1	11082.1	106.513
101	91	65.086	53.587	10	125.63	146.31	5922.85	5922.85	90.139	0.990005
102	92	79.542	29.235	11.527	244	-128.758	7317.91	7317.91	91.049
103	459	85.197	88.212	8.638	233.731	-73.625	39105.4	39105.4	457.561	3.93165
104	117	80.67	36.104	18.577	218	19.058	9438.44	9438.44	116.379
105	244	125.453	198.12	7.156	236.134	45.666	30610.4	30610.4	243.261	2.01989
106	121	108.995	112.636	2	231.335	-54.462	13188.3	13188.3	120.433
107	300	126.62	227.42	1.598	238.041	-112.62	37986.1	37986.1	299	3.66381
108	83	77.624	26.132	7.898	171.688	-36.027	6442.79	6442.79	81.609
109	376	113.343	5.468	5	244.746	80.337	42617.1	42617.1	375.325	2.39786
110	158	108.77	70.423	3	234.682	-10.305	17185.6	17185.6	156.525
111	289	123.937	168.982	0	231.954	71.188	35817.8	35817.8	288.406	2.32698
112	125	104.738	168.848	2	244	-14.485	13092.3	13092.3	123.94
113	207	132.586	192.382	5.483	229.587	-144.075	27445.3	27445.3	206.228	2.02966
114	103	115.068	53.867	8	236	-53.807	11852	11852	101.607
115	374	74.491	53.778	4.866	248	92.61	27859.7	27859.7	373.387	3.59676
116	105	75.217	38.831	17.97	199	13.367	7897.74	7897.74	103.812
117	246	110.594	25.353	9.539	240.878	57.152	27206	27206	245.204	2.09247
118	118	81.172	64.09	2	172	-27.44	9578.34	9578.34	117.184
119	345	140.008	199.923	7.781	245.981	174.836	48302.8	48302.8	344.398	6.04112
120	58	71.881	38.697	7	167.684	-88.995	4169.07	4169.07	57.009
121	248	123.226	24.156	0	233.355	30.09	30559.9	30559.9	247.33	2.17626
122	115	127.153	112.084	8.598	236	-61.631	14622.5	14622.5	113.649
123	221	122.44	192.127	1	250	-92.343	27059.3	27059.3	220.184	1.61534
124	137	126.102	191.796	9.853	244.5	14.444	17276	17276	136.308
125	314	98.55	52.164	7.451	234.113	-6.603	30944.8	30944.8	313.077	2.46242
126	128	101.006	47.629	10.727	227.898	-97.684	12928.7	12928.7	127.142
127	321	96.324	32.416	3.193	240.691	-38.911	30919.9	30919.9	320.003	2.84159
128	114	98.583	37.062	11	222.807	52.214	11238.5	11238.5	112.614
129	311	127.873	147.74	0	235.648	-98.156	39768.5	39768.5	310.137	2.52754
130	124	107.385	71.697	7.561	240.453	-19.026	13315.7	13315.7	122.703
131	110	118.07	38.635	14.984	235.155	-57.771	12987.7	12987.7	108.757	1.79452
132	62	95.281	69.985	21	228.275	-142.374	5907.44	5907.44	60.605
133	112	118.541	151.027	5.209	248.396	-95.711	13276.6	13276.6	110.549	1.0229
134	109	119.989	28.721	1	250	-177.879	13078.8	13078.8	108.074
135	247	108.197	150.335	3.333	221.492	-85.798	26724.7	26724.7	245.66	3.1369
136	79	89.332	57.07	2	214	5.128	7057.2	7057.2	78.313
137	166	128.15	149.947	1.052	251	-100.149	21272.8	21272.8	164.575	1.86249
138	89	107.843	71.033	14	240.364	-5.194	9598	9598	88.363
139	179	139.526	134.725	18.903	218.569	-152.286	24975.2	24975.2	178.474	1.55189
140	116	97.096	70.724	19	221.157	-61.429	11263.1	11263.1	115.004
141	274	119.871	145.547	21.934	225.439	-162.496	32844.6	32844.6	272.624	1.73109
142	158	130.107	153.079	6.103	219.281	-71.105	20556.9	20556.9	157.487
143	282	124.327	147.535	3.628	239.029	-130.38	35060.1	35060.1	280.927	1.5042
144	188	115.827	163.87	3.364	219.057	136.736	21775.5	21775.5	186.762
145	256	103.267	100.907	2.153	241.783	69.575	26436.2	26436.2	255.033	1.84962
146	139	113.577	5.453	5	237.024	156.038	15787.3	15787.3	137.884
147	159	80.03	30.074	5.989	247.784	-121.774	12724.8	12724.8	157.623	1.63905
148	97	81.36	172.363	0	250	-45	7891.95	7891.95	96.167
149	424	134.281	189.215	7.245	245.528	-118.2	56935.1	56935.1	423.236	3.53557
150	121	113.953	36.637	8.8	242.45	-30.635	13788.3	13788.3	119.708
151	266	90.054	10.209	1	249.156	-120.147	23954.4	23954.4	264.821	2.10721
152	127	81.065	90.575	1	218.356	154.047	10295.2	10295.2	125.674
153	204	105.432	32.545	2.998	251	-120.236	21508.2	21508.2	202.556	1.579
154	129	76.799	32.933	6	232.062	-30.964	9907.05	9907.05	128.281
155	222	109.646	9.297	3	251	-121.675	24341.3	24341.3	220.907	2.63565
156	85	76.874	6.479	6	251	-35.776	6534.33	6534.33	83.815
157	244	131.27	155.055	1	253	-86.703	32029.8	32029.8	243.403	1.75789
158	139	117.618	156.125	0	237.198	169.177	16349	16349	138.463
160	376	130.25	164.001	8.462	236.646	8.433	48973.8	48973.8	375.055	2.88366
161	131	106.646	142.168	21.185	217.831	-88.238	13970.7	13970.7	130.062
162	141	143.442	91.096	43	240	-145.513	20225.3	20225.3	139.521	1.3037
163	108	121.36	176.203	8.297	228.164	-66.309	13106.9	13106.9	107.019
164	134	117.836	24.683	7.87	217.822	25.796	15790.1	15790.1	133.282	1.47681
165	91	99.516	25.142	10.453	225.329	-68.552	9055.93	9055.93	90.25

## Sheet: high strain
1	321	130.641	177.023	8	225.984	-94.838	41935.8	41935.8	320.141	4.13544
2	78	87.994	23.852	11	199	-5.932	6863.49	6863.49	77.414
3	288	124.895	186.864	8	218.525	57.529	35969.9	35969.9	286.845	2.11822
4	136	108.433	40.693	10	237.748	-37.801	14746.9	14746.9	135.418
5	244	109.111	195.407	7.222	229.741	94.96	26623.2	26623.2	242.909	3.39975
6	72	94.01	91.7	16.746	211.549	6.429	6768.7	6768.7	71.449
7	266	100.804	39.905	3.71	232.5	-105.085	26813.9	26813.9	265.136	1.24929
8	213	67.73	18.325	2.736	230.779	-19.545	14426.5	14426.5	212.229
9	331	106.223	244.742	1	251.092	-86.348	35159.7	35159.7	329.67	3.01827
10	110	67.59	6.342	6	181	3.674	7434.95	7434.95	109.225
11	315	75.125	50.796	1	243.814	-117.954	23664.3	23664.3	313.589	3.80731
12	83	75.617	40.594	7.317	194.544	-29.055	6276.2	6276.2	82.365
13	345	115.75	243.295	1	251.616	-119.993	39933.7	39933.7	344.076	6.66504
14	53	78.331	61.017	2.811	160.491	148.465	4151.56	4151.56	51.624
15	319	95.011	62.228	4.275e-11	213.83	-98.13	30308.5	30308.5	318.198	3.87871
16	83	83.724	67.732	4	223	-9.118	6949.12	6949.12	82.037
17	188	72.196	3.409	3	212.44	-81.697	13572.8	13572.8	186.96	2.83402
18	67	82.798	74.084	0	205.033	14.036	5547.5	5547.5	65.97
19	318	87.889	77.734	6.31	233.448	-83.301	27948.8	27948.8	317.166	3.44016
20	93	71.257	24.998	0	154.206	12.529	6626.88	6626.88	92.195
21	298	121.669	193.03	3.515	237.326	-86.327	36257.4	36257.4	296.609	2.09378
22	143	98.278	110.163	6.121	229.006	-149.452	14053.7	14053.7	141.662
23	318	116.11	178.032	4.004	229.58	-98.334	36922.9	36922.9	317.352	3.62009
24	89	116.496	108.869	14.366	229.412	-11.182	10368.1	10368.1	87.664
25	199	86.748	2.412	0	247	-92.025	17262.9	17262.9	198.124	1.62135
26	123	99.228	176.332	7.699	230.801	-21.105	12205.1	12205.1	122.197
27	414	113.494	31.601	3.209	233.954	-72.663	46986.7	46986.7	412.753	3.63509
28	115	85.318	2.199	1.751	230.816	19.552	9811.56	9811.56	113.547
29	357	80.649	5.46	5	240.438	-91.287	28791.8	28791.8	356.09	3.38995
30	106	71.012	41.739	5	231.629	1.637	7527.26	7527.26	105.043
31	253	115.468	1.455	1	234	-111.675	29213.3	29213.3	251.803	3.11726
32	82	71.73	23.711	4.889	229	-31.329	5881.83	5881.83	80.777
33	270	120.079	146.25	5.697	231.287	45.302	32421.4	32421.4	268.704	2.43272
34	111	101.908	9.78	0.427	228.464	-58.325	11311.8	11311.8	110.454
35	163	81.893	20.758	4.987	201.934	-115.934	13348.5	13348.5	162.348	1.82368
36	90	41.394	21.155	8.024	114.742	-38.157	3725.49	3725.49	89.022
37	185	104.462	32.856	8.482	220	-117.816	19325.6	19325.6	184.296	1.87317
38	99	85.386	74.943	9.876	227.616	-26.565	8453.18	8453.18	98.387
39	291	102.609	154.273	2	233.347	-134.721	29859.2	29859.2	289.917	2.54942
40	115	111.821	9.429	9	228.665	-55.751	12859.4	12859.4	113.719
41	244	135.147	139.091	19.203	234.58	-110.97	32975.8	32975.8	243.101	1.97285
42	124	134.521	138.264	0	236.76	-35.754	16680.6	16680.6	123.223
43	276	141.834	167.227	23.833	233	-97.099	39146.2	39146.2	275.109	2.23637
44	124	129.036	65.445	12.523	229.291	162.007	16000.5	16000.5	123.016
45	139	114.573	50.996	24.667	232.063	-98.778	15925.6	15925.6	137.612	1.9609
46	71	85.368	89.742	14	154	-4.086	6061.14	6061.14	70.178
47	246	139.971	173.686	9.327	220.234	-113.321	34432.8	34432.8	245.018	2.86186
48	87	132.506	97.452	23.228	228.648	-14.199	11528	11528	85.615
49	156	114.794	91.337	22.922	237.82	-96.299	17907.8	17907.8	154.935	1.84328
50	85	108.506	89.537	14	235	-2.045	9223	9223	84.054
51	190	103.817	67.574	5.519	234.096	-84.229	19725.3	19725.3	188.958	2.48094
52	77	53.991	7.118	0	125.671	3.764	4157.33	4157.33	76.164
53	331	149.248	172.373	10.678	238.744	-85.828	49400.9	49400.9	329.874	5.13175
54	65	87.099	62.082	9	223	5.356	5661.41	5661.41	64.281
55	147	54.543	10.295	1	227.63	-91.569	8017.81	8017.81	146.055	1.76534
56	84	67.51	11.4	3	207.788	-7.64	5670.85	5670.85	82.735
57	258	111.838	77.198	2	241.14	-90.892	28854.2	28854.2	257.031	3.88728
58	67	74.328	9.131	6	235	-3.468	4980	4980	66.121
59	217	133.802	207.625	0	238.886	-136.123	29035.1	29035.1	216.416	2.73858
60	80	83.112	69.413	3.26	250.487	-51.68	6648.95	6648.95	79.025
61	226	89.884	90.195	1	235.194	56.592	20313.8	20313.8	225.211	2.62496
62	87	72.874	4.068	3.72	182.004	-40.746	6340.04	6340.04	85.796
63	189	88.743	3.123	2.668	236	-116.157	16772.4	16772.4	188.282	2.90491
64	66	79.323	41.754	7.333	201	-38.108	5235.29	5235.29	64.815
65	248	105.891	2.451	2	232.772	93.721	26261	26261	246.52	3.80567
66	66	51.474	2.809	2	140.111	8.881	3397.28	3397.28	64.777
67	274	94.792	6.348	0	250	-92.307	25973.1	25973.1	273.222	4.07794
68	68	68.279	6.395	2	252	0	4643	4643	67
69	342	113.294	2.462	2	238.522	-98.606	38746.7	38746.7	340.837	4.02914
70	86	75.311	2.41	2	212.059	-6.789	6476.75	6476.75	84.593
71	239	106.843	9.463	0	255	-91.925	25535.5	25535.5	238.134	3.3071
72	73	88.758	9.48	9	255	-179.204	6479.31	6479.31	72.007
73	221	85.05	13.78	9	231.498	-95.218	18796	18796	219.911	2.79828
74	80	72.828	13.809	9.759	240.105	165.256	5826.22	5826.22	78.588
75	316	124.09	56.606	9.837	237.889	-109.642	39212.4	39212.4	315.349	3.63167
76	88	86.673	60.852	9.559	255	-14.676	7627.24	7627.24	86.833
77	381	109.648	20.069	5.713	242.814	-110.962	41775.8	41775.8	380.159	4.77443
78	81	122.133	123.059	8.02	239	-25.278	9892.79	9892.79	79.624
79	243	110.738	89.42	4.811	234.015	-134.33	26909.5	26909.5	241.847	2.9837
80	82	93.094	45.322	15	240	-51.009	7633.74	7633.74	81.056
81	116	94.167	58.709	0	236.685	23.003	10923.4	10923.4	115.156	1.33966
82	87	69.65	0.342	0	175.007	-60.751	6059.54	6059.54	85.959
83	212	104.776	53.236	7.228	235.928	-103.443	22212.4	22212.4	210.775	2.64713
84	81	83.082	102.955	3	196.12	-11.592	6729.62	6729.62	79.624
85	182	110.64	79.357	2.329	244.282	-73.968	20136.5	20136.5	181.041	1.84572
86	99	85.304	55.537	6.194	199.045	23.429	8445.06	8445.06	98.087
87	271	138.068	28.705	20.316	246.375	-71.23	37416.4	37416.4	270.379	1.94397
88	140	117.497	39.978	4.748	233.074	26.934	16449.6	16449.6	139.086
89	218	85.951	14.737	2.486	234.792	-79.624	18737.3	18737.3	216.541	2.0622
90	106	59.042	15.045	5	160.857	-160.53	6258.46	6258.46	105.005
91	214	113.745	64.121	2.349	217.501	-115.602	24341.5	24341.5	212.904	2.92776
92	74	79.213	41.669	13.417	192	-31.504	5861.77	5861.77	72.719
93	217	141.238	191.911	11.849	239.483	-63.08	30648.6	30648.6	216.456	2.45323
94	89	119.515	95.02	3.893	222.94	17.819	10636.8	10636.8	88.233
95	218	130.265	94.857	13.797	233.387	-84.973	28397.7	28397.7	216.834	1.54246
96	142	112.103	95.131	22.849	225.081	-8.591	15918.6	15918.6	140.577
97	248	184.118	191.772	12.356	242.584	-105.275	45661.2	45661.2	246.716	3.19576
98	78	102.226	42.24	7.909	219.686	-16.557	7973.6	7973.6	77.201
99	205	140.734	190.241	2	213.823	-114.048	28850.4	28850.4	203.679	3.47018
100	60	120.569	37.748	9.881	229.385	-23.07	7234.15	7234.15	58.694
101	289	134.897	198.685	5.26	230.849	-71.188	38985.3	38985.3	288.406	2.18327
102	133	102.04	17.797	11	243	-156.346	13571.3	13571.3	132.098
103	206	92.738	22.837	8.659	228.634	-86.65	19104.1	19104.1	205.351	1.98405
104	105	54.094	4.779	1	216	15.642	5679.89	5679.89	103.501
105	188	74.655	4.761	4.312	234	-73.507	14035.2	14035.2	186.682	2.74621
106	69	66.21	77.152	4.208	147.302	26.188	4568.5	4568.5	67.978
107	256	121.849	198.591	5.666	232.741	99.462	31193.4	31193.4	255.476	2.36745
108	109	81.647	68.772	3	226.015	20.618	8899.51	8899.51	107.912
109	290	98.859	67.692	0	249.339	-80.049	28669.1	28669.1	289.353	2.80596
110	104	98.262	113.773	10.853	219.133	19.841	10219.2	10219.2	103.121
111	195	83.631	42.769	2.169	246.725	52.953	16308	16308	194.201	2.06213
112	95	81.382	42.93	16	204.878	-41.987	7731.34	7731.34	94.175
113	276	64.128	34.344	2	242	-57.641	17699.3	17699.3	274.651	2.70504
114	103	80.533	70.818	10	163.392	27.575	8294.9	8294.9	101.533
115	322	85.042	50.573	2	218.254	-27.842	27383.4	27383.4	321.179	2.9255
116	111	68.076	5.727	2	214.024	48.323	7556.42	7556.42	109.786
117	190	78.463	55.423	7.285	217.939	-7.313	14908	14908	188.534	2.11822
118	90	59.471	19.275	6	225.247	89.356	5352.43	5352.43	89.006
119	254	74.687	39.856	2	235.52	-72.997	18970.6	18970.6	253.061	2.22696
120	115	80.469	61.268	0	247	24.986	9253.91	9253.91	113.635
121	293	84.242	8.697	0	234.368	-63.083	24682.8	24682.8	291.589	6.36602
122	47	109.353	129.454	3	236.734	-143.881	5139.58	5139.58	45.804
123	351	69.925	23.236	0	242.794	-62.409	24543.8	24543.8	349.777	6.20656
124	57	114.047	45.298	45	197.806	27.474	6500.68	6500.68	56.356
125	238	115.607	44.101	10.549	239.598	-86.121	27514.6	27514.6	236.542	3.69418
126	65	59.992	27.935	4.094	181	1.79	3899.47	3899.47	64.031
127	190	124.498	53.873	2.227	240.449	-76.551	23654.6	23654.6	189.188	3.08657
128	62	106.453	22.787	4.699	220.07	-151.763	6600.11	6600.11	61.294
129	332	122.933	0.48	0	245.92	58.086	40813.7	40813.7	331.038	3.16947
130	105	77.124	6.445	6	233.852	-30.493	8098.03	8098.03	104.446
131	276	91.156	25.258	0	244	-89.375	25159.2	25159.2	275.016	2.89491
132	96	111.552	100.715	1	255	0	10709	10709	95
133	166	123.067	83.829	0.786	241	-107.996	20429.1	20429.1	165.076	1.7001
134	98	137.508	187.817	2.808e-11	239.806	-32.381	13475.8	13475.8	97.098
135	187	109.808	45.715	1	232.252	-101.491	20534.1	20534.1	185.723	1.78473
136	105	101.872	35.019	4.272	226	-19.654	10696.5	10696.5	104.062
137	187	66.019	60.656	0.309	222.595	-8.653	12345.6	12345.6	186.118	2.11279
138	89	74.466	10.234	2.591	172.727	-92.603	6627.45	6627.45	88.091
139	237	131.141	164.976	3.546	212.792	-64.087	31080.3	31080.3	235.697	2.3797
140	100	110.953	12.603	4	235.84	35.134	11095.3	11095.3	99.045
141	225	131.465	160.504	8.144	249.656	-25.992	29579.7	29579.7	223.618	1.56525
142	144	111.474	51.775	11	235.481	-113.515	16052.2	16052.2	142.864
143	255	123.748	0.473	0	242.142	-77.937	31555.8	31555.8	253.6	2.95585
144	87	136.209	185.295	0	234.25	21.181	11850.2	11850.2	85.796
145	259	110.52	52.264	10.035	228.433	-132.96	28624.8	28624.8	258.258	2.0498
146	127	107.036	58.042	11.667	225.579	-42.427	13593.6	13593.6	125.992
147	246	123.223	14.116	6	250.433	-58.715	30312.8	30312.8	244.561	1.97375
148	125	120.883	14.321	13	238.498	-137.944	15110.4	15110.4	123.907
149	240	103.118	44.85	5.834	230.289	-55.911	24748.4	24748.4	239.082	2.53356
150	95	99.944	64.024	9.611	239.854	49.728	9494.72	9494.72	94.366
151	205	149.034	143.798	4	217.662	-77.807	30551.9	30551.9	203.593	3.39843
152	61	149.415	146.115	22.725	219.533	14.5	9114.33	9114.33	59.908
153	265	127.907	131.306	11.888	216.376	-81.287	33895.5	33895.5	264.047	2.04191
154	130	109.845	167.82	1	217.233	3.991	14279.8	14279.8	129.314
155	377	133.061	135.23	7.908	212.262	-58.722	50163.8	50163.8	375.588	6.54015
156	58	94.984	5.116	4.684	226	-144.926	5509.06	5509.06	57.428
157	273	139.787	136.598	4.99	225.919	-28.258	38161.9	38161.9	272.472	2.56947
158	107	114.982	159.902	19.405	220.903	-110.999	12303	12303	106.042
159	296	120.092	132.289	10.359	234.115	-16.159	35547.1	35547.1	294.64	4.3134
160	69	101.123	24.669	14.938	214.229	-107.904	6977.49	6977.49	68.308
161	324	140.159	136.862	9.824	231.816	-84.501	45411.5	45411.5	323.489	5.70336
162	58	88.602	23.064	6.965	229.74	9.13	5138.92	5138.92	56.719
163	134	76.155	44.264	10.506	213.846	-114.05	10204.8	10204.8	132.503	1.8296
164	73	71.747	61.338	3	254	-35.446	5237.52	5237.52	72.422
165	273	129.928	17.097	9.207	246.849	-117.886	35470.2	35470.2	271.531	5.79439
166	48	83.285	74.123	10.31	223.853	-39.806	3997.68	3997.68	46.861
167	202	98.493	15.909	8.203	240.278	-95.994	19895.5	19895.5	201.099	2.34888
168	87	58.602	56.785	2	200.934	-14.199	5098.4	5098.4	85.615
169	232	135.563	189.499	14	249.841	-102.771	31450.7	31450.7	230.708	2.59681
170	90	108.4	26.244	6	226.533	-11.689	9756.01	9756.01	88.843
171	121	92.663	53.119	4.354	233.415	-73.072	11212.3	11212.3	120.208	1.51931
172	80	77.691	35.858	7.467	218.137	16.144	6215.28	6215.28	79.12
173	213	119.157	37.56	9.019	233.836	12.265	25380.5	25380.5	211.835	2.20255
174	97	104.058	219.335	7.059	219.75	-81.027	10093.7	10093.7	96.177
175	161	93.903	41.98	2	237.288	-97.927	15118.4	15118.4	159.524	1.17904
176	136	54.854	75.089	0	199.2	-3.814	7460.13	7460.13	135.3
177	422	95.216	38.054	9	237.853	-48.174	40181.4	40181.4	421.375	4.32548
178	98	99.311	39.54	7.69	237.371	31.569	9732.5	9732.5	97.417
179	226	80.005	4.18	0	237.778	-57.724	18081.1	18081.1	224.722	2.76697
180	82	70.357	17.691	5.037	228.451	37.999	5769.29	5769.29	81.216
181	153	78.488	61.217	1	236.354	-76.695	12008.6	12008.6	152.082	1.75878
182	87	63.458	75.25	2	130	5.974	5520.87	5520.87	86.47
183	263	91.831	65.725	6	235.918	-47.476	24151.7	24151.7	261.874	3.97646
184	67	80.609	44.067	5.727	236.667	48.077	5400.81	5400.81	65.856
185	228	128.698	196.324	13.062	243.603	-65.014	29343.3	29343.3	227.271	2.51933
186	91	110.002	55.561	13.688	239.359	35.981	10010.2	10010.2	90.211
187	335	128.848	184.789	11.695	246.772	-40.025	43164	43164	334.307	3.93113
188	86	122.574	33.645	12.08	247	48.814	10541.4	10541.4	85.041
189	268	157.076	179.388	0	239.809	-50.937	42096.2	42096.2	266.595	2.51505
190	107	115.38	93.483	2.566	246.281	31.891	12345.6	12345.6	106
191	318	138.829	182.657	2.699	248.402	-86.74	44147.6	44147.6	316.512	2.15319
192	148	101.803	86.529	2.175	246.18	14.982	15066.9	15066.9	146.997
193	278	79.838	18.259	1.005	227.515	-94.351	22194.8	22194.8	276.798	2.7958
194	100	57.459	18.349	5	200.273	0.579	5745.92	5745.92	99.005
195	166	92.034	10.21	1.679e-10	227.277	-120.904	15277.7	15277.7	165.496	1.80014
196	93	87.886	10.845	3.043	238	-44.119	8173.42	8173.42	91.935
197	229	78.603	5.129	0	238.737	-86.987	18000.1	18000.1	228.316	3.04178
198	76	79.853	27.311	0	237	-2.291	6068.84	6068.84	75.06
199	335	118.326	171.364	1	233.604	-46.456	39639.1	39639.1	333.862	2.17193
200	155	101.97	45.516	0	217.794	-138.428	15805.4	15805.4	153.717
201	254	146.18	159.308	19.153	223.595	-68.914	37129.7	37129.7	252.937	2.91641
202	88	132.78	164.352	28.478	241.222	20.943	11684.6	11684.6	86.729
203	403	144.541	163.48	4.92	240.231	-76.033	58250.2	58250.2	401.882	5.54335
204	73	117.704	108.557	22.167	226	24.444	8592.38	8592.38	72.498
205	193	65.781	9.668	1	234.583	-43.52	12695.8	12695.8	191.69	2.02862
206	95	90.635	103.877	15.803	211.016	-129.417	8610.37	8610.37	94.493
207	258	116.511	164.044	2	215.281	-52.595	30059.9	30059.9	256.811	3.39293
208	77	83.647	15.65	13.668	216.635	-133.394	6440.84	6440.84	75.69
209	211	100.742	0.424	0	216.838	-63.068	21256.6	21256.6	209.747	1.8964
210	112	102.916	1.346	0	229.67	37.284	11526.5	11526.5	110.603

## Sheet: statistics
static	0.1	0.2
2.20086	2.32115	4.13544
2.91008	1.76827	2.11822
1.80181	1.72588	3.39975
2.0976	3.16069	4.23
1.59048	2.21027	3.01826
1.26186	4.41857	3.80731
2.71346	2.48815	6.66504
1.93045	2.44761	3.87871
1.52232	2.20424	2.83401
2.60191	3.7539	3.44016
2.52026	3.26732	2.09378
4.23448	3.21509	3.6201
2.08177	3.26267	4.2
1.38198	2.94725	3.63509
1.8339	1.98765	3.38994
2.13701	4.77536	3.11726
2.45718	2.03819	2.43272
1.97325	2.91558	4.4
1.523	4.43635	4.733
2.53875	3.06122	2.54942
2.51611	2.7468	3.754
2.56448	3.30019	2.23637
3.36078	2.8075	5.332
1.76327	3.76975	2.86186
3.27184	3.35966	4.322
1.23432	2.21778	2.48094
3.64508	1.56015	5.13175
2.81951	1.93777	5.34
2.70243	2.10317	3.88728
2.20895	2.51639	2.73858
1.83806	1.73348	2.62496
2.05947	2.40952	2.90491
2.56298	4.34342	3.80567
1.70543	3.6435	4.07794
1.5432	2.98965	4.02914
1.45304	2.90709	3.30709
2.01236	1.6047	2.79828
1.84177	1.61762	3.63167
2.65765	2.34252	4.77443
3.25455	1.54385	2.9837
2.83082	3.71028	3.23
3.81726	2.17648	2.64713
2.46662	2.34979	3.975
2.48041	2.22757	5.3356
3.19629	2.01539	2.0622
2.8846	1.69537	2.92776
3.01328	2.00251	2.45323
3.98235	3.41303	5.1245
3.53676	3.08898	3.19576
4.30023	4.40562	3.47018
4.22879	6.3244	2.18327
2.39639	3.93165	6.24656
1.78561	2.01989	2.74621
2.00937	3.66381	2.36745
2.41668	2.39786	2.80596
3.03983	2.32698	2.06213
3.88086	2.02966	2.70504
4.29841	3.59676	2.9255
2.04461	2.09247	2.11822
1.44135	6.04112	2.22696
2.53832	2.17626	6.36602
2.83545	1.61534	6.20656
2.34812	2.46242	3.69418
1.82993	2.84159	3.08657
1.23454	2.52754	3.16947
1.05432	1.79452	2.89491
2.17808	4.87654	4.356
2.83184	3.1369	4.7466
2.81679	1.86249	2.11279
2.44842	1.55189	2.3797
2.74533	1.73109	4.134
1.345	1.5042	2.95585
2.80278	1.84962	2.0498
2.71612	1.63905	3.8533
2.37314	3.53557	2.53356
1.34565	2.10721	3.39843
1.7654	1.579	2.04191
1.4567	2.63565	6.54016
2.07654	1.75789	2.56947
1.34567	2.88366	4.3134
1.6543	2.4321	5.70336
1.08765	1.47681	4.6673
1.2345	4.123	5.79439
1.98765	3.6543	2.34888
1.16543	3.23345	2.59681
1.32134	3.46543	4.3245
1.3456		2.20255
		2.51933
		3.93113
		2.51505
		2.15319
		2.7958
		5.0146
		3.04178
		2.17193
		2.91641
		5.54335
		2.02862
		3.39293
