# Supplementary material for: Aorta smooth muscle-on-a-chip reveals impaired mitochondrial dynamics as a therapeutic target for aortic aneurysm in bicuspid aortic valve disease
Source: eLife journal article supplement (doi:10.7554/elife.69310), 2021-09-06
Supplement: supp [file Figure 3-source data 2.xlsx]

## Sheet: static
Angle(static-1)		Angle(static-2)		Angle(static-3)			angle	Angle(static-1)	Angle(static-2)	Angle(static-3)			frequency(%)
0		1.517		1.591			0-10 °	17	10	22	49	0.134986	0.135
0.603		1.806		1.79			10-20 °	9	20	8	37	0.101928	0.1019
1.134		3.205		2.468			20-30 °	14	13	21	48	0.132231	0.1323
1.517		3.495		2.834			30-40 °	14	18	17	49	0.134986	0.135
2.027		3.814		2.961			40-50 °	23	27	13	63	0.173554	0.1212
2.224		4.033		3.151			50-60 °	17	23	10	50	0.137741	0.1377
2.627		4.033		3.708			60-70 °	12	7	9	28	0.077135	0.0771
2.684		8.049		4.145			70-80 °	6	7	7	20	0.0550964	0.0734
3.2		8.286		4.441			80-90 °	9	4	6	19	0.0523416	0.0785
3.965		10.261	10	4.821
4.529		11.215		4.939				121	129	113	363	1	0.9921
5.117		11.592		5.44
5.937		11.689		5.826
6.399		11.689		6.096
9.028		12.46		6.096
10.547		12.482		7.189
10.65	17	12.562		7.524
		12.562		7.943
11.189		12.817		8.063
13.671		12.817		8.664
14.859		13.736		9.039
15.403		13.856		9.894	22
16.79		15.619		12.529
16.991		15.619		15.322
18.06		17.082		16.011
18.622		17.082		17.319
20.956	9	17.447		17.571
		18.178		17.819
21.431		18.741		19.47
22.38		18.812	20	20.136	8
23.199		21.983		21.125
23.499		22.19		21.329
24.891		22.19		21.903
25.33		22.319		23.459
26.333		24.063		23.477
26.751		24.063		23.477
27.004		24.201		25.641
27.81		25.253		25.837
28.421		26.565		26.274
29.11		27.816		26.565
29.887		28.664		26.565
30.854	14	28.811		27.031
		29.615	13	27.499
31.068		32.247		27.979
31.43		32.247		28.301
31.544		32.471		28.968
33.341		32.905		30.466
36.225		32.969		30.548
36.978		33.126		30.6
37.185		33.126		30.677
37.504		33.326		30.816	21
37.972		33.797		31.304
38.395		34.359		32.347
38.48		34.951		33.179
38.66		34.951		33.968
39.118		35.311		34.54
40.846	14	36.733		34.992
		39.161		36.158
41.082		39.161		37.216
41.479		39.401		38.047
41.634		39.401	18	38.66
42.071		41.065		38.991
42.51		41.112		39.094
43.764		41.112		39.193
43.946		42.474		39.289
44.709		42.474		39.677
45		43.238		40.079
45.971		43.305		40.914	17
46.067		43.305		42.563
46.469		43.586		43.431
46.591		44.007		44.474
46.897		44.007		44.484
47.141		44.136		45
47.203		44.139		45.424
49.028		44.265		45.431
49.145		44.265		45.881
49.8		45		46.528
49.844		45.356		48.318
50.194		45.424		49.028
50.332		45.481		49.044
50.56	23	46.97		50.11	13
		46.975		51.546
52.074		47.936		51.981
52.595		48.366		52.481
53.771		48.705		53.427
54.934		49.145		57.265
55.257		49.145		57.758
55.521		50.56	27	59.574
56.129		51.248		59.808
56.165		51.422		59.808
56.689		51.438		60.408	10
56.802		51.438		61.26
57.095		51.524		62.468
57.144		51.524		63.153
57.171		52.696		63.435
57.381		53.686		63.435
58.57		54.147		63.435
59.036		54.421		64.44
60.803	17	56.113		65.799
		56.113		66.038	9
62.865		56.482		71.075
63.687		56.712		71.565
65.136		58.173		72.072
65.556		59.1		73.673
65.913		59.1		75.964
65.925		59.718		76.837
66.337		59.718		78.111	7
66.541		59.734		81.764
66.552		59.744		84.184
67.92		59.931		85.914
69.528		60.362	23	86.424
70.641	12	61.049		87.274
		61.049		88.069	6
71.017		65.376
77.94		66.71
77.949		69.444
78.541		69.444
79.019		70.145	7
79.472	6	71.075
		72.293
81.347		75.579
81.941		76.13
82.794		78.14
84.226		78.503
84.352		80.727	7
86.367		83.723
87.553		88.788
88.282		89.012
89.157	9	90.666	4

## Sheet: low strain
Angle(10%-1)		Angle(10%-2)		Angle(10%-3)			angle	Angle(10%-1)	Angle(10%-2)	Angle(10%-3)			frequency(%)
0.466		1.112		1.123			0-10 °	10	8	10	28	0.0727273	0.0727
1.081		1.79		2.564			10-20 °	8	3	8	19	0.0493506	0.0494
2.386		2.573		2.651			20-30 °	17	9	10	36	0.0935065	0.0935
2.517		3.514		2.951			30-40 °	11	8	9	28	0.0727273	0.0727
3.608		4.198		3.284			40-50 °	11	13	10	34	0.0883117	0.0883
3.857		6.823		3.366			50-60 °	15	16	16	47	0.122078	0.1221
4.038		9.36		3.865			60-70 °	21	24	19	64	0.166234	0.1662
6.68		9.782	8	5.194			70-80 °	27	22	28	77	0.2	0.2
6.968		11.739		8.297			80-90 °	30	11	11	52	0.135065	0.1351
7.595	10	16.285		8.616	10
10.972		18.642	3	10.305				150	114	121	385	1	1
12.947		21.801		10.886
13.069		22.109		15.945
14.715		22.348		18.072
15.524		23.499		18.138
16.429		23.749		18.635
16.783		25.017		19.592
17.956	8	26.996		19.916	8
20.186		27.013		21.909
20.2		29.982	9	22.126
22.38		31.171		23.114
22.834		31.487		23.114
23.051		32.645		25.058
23.139		34.216		26.928
23.595		34.875		27.316
23.629		37.011		27.316
24.647		38.66		27.451
25.201		39.588	8	28.465	10
25.769		40.525		30.745
26.274		42.474		31.43
26.288		42.553		32.25
26.565		43.238		32.829
27.499		43.363		34.196
28.106		44.493		34.939
28.346	17	45.674		36.703
30.735		47.862		37.147
31.122		47.951		39.094	9
31.247		48.013		42.166
31.522		48.318		42.663
34.403		49.145		42.955
34.535		49.538	13	44.145
34.548		50.371		45
38.186		51.033		46.169
38.186		52.696		46.185
38.766		53.448		47.911
39.063	11	54.31		48.225
40.539		54.782		49.8	10
42.879		55.67		52.431
42.979		56.535		53.746
43.103		56.889		54.013
43.122		57.061		54.197
43.854		57.144		54.224
45.466		57.265		54.462
46.931		57.67		54.462
47.684		57.894		54.652
48.013		57.995		54.752
49.635	11	59.507	16	55.886
50.366		60.113		57.426
50.673		60.255		57.829
50.711		60.611		58.707
50.954		61.327		59.439
53.616		62.021		59.574
53.791		62.745		59.642	16
54.019		63.435		60.317
55.582		63.914		60.611
55.981		64.29		60.611
56.842		64.687		61.39
57.072		64.799		62.162
57.407		64.942		62.354
57.907		64.983		63.072
59.036		65.045		63.13
59.931	15	65.833		63.435
60.843		66.413		65.433
61.049		66.695		66.038
62.003		66.886		67.557
62.319		66.886		67.855
62.403		67.203		68.078
62.613		67.286		68.286
63.733		67.557		68.654
64.335		69.864		69.146
64.44		69.887	24	69.228
64.949		71.565		69.528	19
65.283		72.15		70.115
65.462		72.35		70.677
66.557		72.597		70.75
67.094		73.072		72.15
67.457		73.673		72.44
67.457		74.055		72.44
67.999		74.407		72.474
68.025		74.954		73.202
68.6		74.995		73.872
68.806		75.217		73.94
69.775	21	75.379		74.814
72.051		75.809		74.954
72.121		76.097		75.124
72.44		76.122		75.44
72.646		76.159		75.964
72.777		77.152		76.239
73.191		77.293		76.342
73.571		78.906		77.047
73.78		79.261		77.32
73.791		79.315		77.55
74.219		79.461	22	77.873
76.149		80.69		78.366
76.452		81.304		78.53
76.551		81.724		78.818
76.729		82.333		78.818
77.005		82.405		79.34
77.335		82.875		79.38
77.471		83.774		79.796	28
77.471		84.289		81.634
77.957		87.306		82.405
78.024		87.955		82.725
78.111		89.045	11	82.999
78.111				83.737
78.566				85.121
78.573				86.332
78.887				86.424
78.959				86.634
79.38	27			87.039
80.166				87.51	11
80.218
80.218
80.293
80.665
80.838
80.858
81.027
81.119
81.298
81.469
81.469
81.573
81.741
81.787
83.66
84.075
84.207
84.872
85.236
85.486
85.553
85.668
85.668
85.684
87.026
87.979
88.191
88.62
91.828	30

## Sheet: high strain
Angle(20%-1)		Angle(20%-2)		Angle(20%-3)			angle	Angle(20%-1)	Angle(20%-2)	Angle(20%-3)			frequency(%)
0.699		0.807		12.745			0-10 °	4	2	0	6	0.0143885	0.0144
2.141		7.815	2	13.046			10-20 °	4	2	4	10	0.0239808	0.024
3.576		19.699	2	13.523			20-30 °	1	2	4	7	0.0167866	0.0168
5.254	4	23.07	2	18.263	4		30-40 °	8	6	10	24	0.057554	0.0576
17.162		33.69		22.874			40-50 °	11	13	6	30	0.0719424	0.0719
18.658		35.776		23.875			50-60 °	17	15	10	42	0.100719	0.1007
18.687		37.569		24.034			60-70 °	27	42	29	98	0.235012	0.235
19.25	4	39.063		25.346	4		70-80 °	26	33	41	100	0.239808	0.24
28.217	1	39.898	6	30.379			80-90 °	32	37	31	100	0.239808	0.24
34.592		40.389		30.434
36.87		40.475		30.838				130	152	135	417	1	1.0004
36.87		40.601		32.661
37.117		44.433		32.829
37.493		45		34.461
37.933		46.273		34.931
39.094		46.975		35.942
39.536	8	47.77		36.18
42.594		48.225		38.346	10
43.025		48.424		41.248
44.341		48.504		41.455
45.535		48.814		41.934
47.974		49.514	13	44.31
48.743		50.194		47.291
49.014		50.856		49.014	6
49.054		52.017		50.194
49.332		52.172		51.096
49.708		52.214		53.865
49.865	11	53.286		54.395
50.845		55.154		54.689
51.277		55.176		55.389
51.34		55.426		56.083
51.71		55.437		56.47
52.125		55.574		56.482
52.275		56.464		56.821	10
54.028		58.12		60.499
54.689		58.465		60.546
55.582		59.642	15	60.642
56.056		60.141		60.68
56.094		60.186		60.819
56.793		60.479		60.876
57.011		60.479		61.26
58.339		60.604		61.26
58.536		60.945		61.654
58.736		61.587		61.975
59.574	17	62.038		62.021
60.086		62.281		62.475
60.44		62.425		62.765
61.39		62.549		63.034
61.821		62.731		63.435
61.975		63.435		63.435
62.526		63.682		63.435
63.435		63.914		65.854
63.75		63.97		66.228
64.041		64.564		66.552
64.537		64.722		67.23
64.841		64.799		67.496
64.885		64.832		67.496
64.904		64.942		68.72
65.48		64.942		68.86
66.038		65.4		68.86
66.501		65.45		69.015
66.997		65.659		69.837
67.329		66.251		69.88	29
67.38		66.329		70.084
68.749		66.705		70.168
68.962		67.036		70.253
69.228		67.504		70.301
69.55		67.537		70.953
69.567		68.025		71.003
69.624		68.199		71.053
69.864		68.694		71.565
69.887	27	68.749		71.565
70.115		69.044		71.822
71.053		69.193		72.181
71.274		69.246		72.734
71.811		69.444		72.784
71.94		69.444		73.101
72.051		69.444		73.56
72.14		69.702	42	73.74
73.101		70.017		74.055
74.445		70.253		74.249
74.476		70.278		74.427
74.846		70.396		74.427
74.908		70.463		74.846
75.256		70.78		74.899
76.651		70.78		75.069
77.074		71.147		75.124
77.125		71.175		75.256
77.53		71.175		75.964
77.574		71.333		76.13
77.661		71.565		76.827
77.784		71.878		76.891
78.311		73.191		76.891
78.425		73.229		77.053
78.559		73.523		77.32
78.774		73.715		77.391
79.34		73.856		77.735
79.919	26	74.055		77.943
80.38		74.275		78.111
80.538		74.745		78.408
81.304		75.311		78.944
81.511		75.411		79.487
81.724		75.784		79.695
81.87		76.399		79.695	41
81.87		76.866		80.022
81.87		77.125		80.218
81.983		77.196		80.256
82.011		77.391		80.372
82.747		77.969		81.069
82.875		78.566		81.158
82.875		79.186		81.158
83.191		79.461	33	81.254
83.29		80.134		81.347
83.845		80.181		81.764
84.094		80.293		81.87
84.094		81.055		82.304
84.289		81.254		82.321
84.369		81.529		82.405
84.726		81.87		83.367
84.806		82.057		83.418
84.92		82.147		83.737
85.601		82.208		83.884
85.914		82.569		85.101
85.986		82.776		85.121
86.009		82.786		85.236
86.186		82.954		85.426
86.348		82.972		85.553
87.614		83.48		86.285
88.091		83.66		87.739
89.326	32	83.853		87.839
		84.094		87.839
		84.114		88.182
		84.289		88.431
		84.644		88.452
		84.738		89.384	31
		85.156
		85.292
		85.365
		85.365
		85.986
		86.424
		87.51
		87.979
		88.091
		88.112
		88.315
		88.819
		88.831
		90	37
