# Supplementary material for: Aorta smooth muscle-on-a-chip reveals impaired mitochondrial dynamics as a therapeutic target for aortic aneurysm in bicuspid aortic valve disease
Source: eLife journal article supplement (doi:10.7554/elife.69310), 2021-09-06
Supplement: supp [file Figure 4-source data 1.xlsx]

## Sheet: SM22
SM22
WT	static		0.1		0.2
1	1353306	13.5331	1964486	19.6449	1502053	15.0205
2	1356541	13.5654	1838553	18.3855	1393715	13.9372
3	1597538	15.9754	1641585	16.4158	1460334	14.6033
4	813990	8.1399	1862329	18.6233	1702572	17.0257
5	1204345	12.0434	1688248	16.8825	1278352	12.7835
6	1060708	10.6071	1806651	18.0665	1847117	18.4712
7	1202990	12.0299	1870055	18.7005	1621323	16.2132
8	1087366	10.8737	1992162	19.9216	1384786	13.8479
9			2022869	20.2287	1484288	14.8429
10					1281216	12.8122
SM22
Notch1-kd	static		0.1		0.2
1	1444228	14.4423	1204326	12.0433	1627527	16.2753
2	1375286	13.7529	1507683	15.0768	1365349	13.6535
3	1757424	17.5742	1085621	10.8562	1271286	12.7129
4	1321586	13.2159	1165939	11.6594	1213901	12.139
5	1352933	13.5293	1461738	14.6174	1122474	11.2247
6	1556935	15.5694	1632427	16.3243	1314756	13.1476
7	1204326	12.0433	1586538	15.8654	1194961	11.9496
8			1290843	12.9084	1273415	12.7341
9			1522488	15.2249	1443109	14.4311
10			1579498	15.795	1166741	11.6674

## Sheet: CNN1
CNN1
WT	static		0.1		0.2
	794247	7.94247	478813	4.78813	545017	5.45017
	294452	2.94452	547275	5.47275	588336	5.88336
	339843	3.39843	502453	5.02453	454769	4.54769
	460903	4.60903	748277	7.48277	512107	5.12107
	460903	4.60903	815884	8.15884	645117	6.45117
	570857	5.70857	792618	7.92618	510280	5.1028
	279625	2.79625	833932	8.33932	545655	5.45655
			833932	8.33932	859497	8.59497
			736896	7.36896	769879	7.69879
CNN1
Notch1-kd	static		0.1		0.2
	792439	7.92439	485013	4.85013	611599	6.11599
	625939	6.25939	696390	6.9639	388526	3.88526
	684729	6.84729	459579	4.59579	442907	4.42907
	505483	5.05483	531644	5.31644	660185	6.60185
	228803	2.28803	494814	4.94814	216733	2.16733
	747396	7.47396	590493	5.90493	474941	4.74941
	812510	8.1251	574869	5.74869	501892	5.01892
	775752	7.75752	593546	5.93546	537817	5.37817
	269332	2.69332	587342	5.87342	480591	4.80591								255
	482176	4.82176			337116	3.37116								255
	556985	5.56985												255
														255
