# Supplementary material for: Aorta smooth muscle-on-a-chip reveals impaired mitochondrial dynamics as a therapeutic target for aortic aneurysm in bicuspid aortic valve disease
Source: eLife journal article supplement (doi:10.7554/elife.69310), 2021-09-06
Supplement: supp [file Figure 5-source data 1.xlsx]

## Sheet: data
	WT	static			0.1		0.2
		158			90		32		Compare each cell mean with the other cell mean in that row
		88			80		34
		74			57		45		Number of families	1
		90			76		43		Number of comparisons per family	3
		80			78		37		Alpha	0.05
		89			69		21
		78			87		57		Sidak's multiple comparisons test	Mean Diff.	95.00% CI of diff.	Significant?	Summary	Adjusted P Value
		101			90		45
		227			56		34		WT - NOTCH1-KD
		105			87		45		Static	9.55	-0.9379 to 20.04	No	ns	0.0856
		86			67		44		Low strain	12.96	2.474 to 23.45	Yes	**	0.01
		167			79		46		High strain	21.85	11.45 to 32.25	Yes	****	<0.0001
		80			67		49
		80			88		50
		83			89		55		Test details	Mean 1	Mean 2	Mean Diff.	SE of diff.	N1	N2	t	DF
		55			81		43
		98			71		37		WT - NOTCH1-KD
		75			45		35		Static	87	77.45	9.55	4.337	26	20	2.202	133
		80			50		39		Low strain	69.96	57	12.96	4.337	26	20	2.989	133
		80			48		43		High strain	41.85	20	21.85	4.302	27	20	5.079	133
		95			53		42
		65			58		48
		64			55		51
		73			75		37
		59			43		36
		69			54		39
		90			69		43
	Notch1	static			0.1		0.2
		90			45		23
		86			60		15
		76			70		23
		90			55		27
		100			54		30
		78			65		16
		65			42		14
		66			49		12
		60			46		17
		79			58		23
		89			60		25
		87			56		24
		75			70		19
		79			61		18
		71			63		24
		89			69		27
		84			82		15
		60			74		18
		55			41		17
		70			42		13
