# Supplementary material for: Aorta smooth muscle-on-a-chip reveals impaired mitochondrial dynamics as a therapeutic target for aortic aneurysm in bicuspid aortic valve disease
Source: eLife journal article supplement (doi:10.7554/elife.69310), 2021-09-06
Supplement: supp [file Figure 5-source data 2.xlsx]

## Sheet: data
			WT	static		low strain		high strain			statistics
			1	602244	6.02244	855428	8.55428	410862	4.10862		Compare each cell mean with the other cell mean in that row
			2	822019	8.22019	698451	6.98451	372774	3.72774
			3	762722	7.62722	741505	7.41505	555821	5.55821		Number of families	1
			4	856494	8.56494	521716	5.21716	561337	5.61337		Number of comparisons per family	3
			5	888199	8.88199	544504	5.44504	527237	5.27237		Alpha	0.05
					7.86336		6.72321		4.85606
											Sidak's multiple comparisons test	Mean Diff.	95.00% CI of diff.	Significant?	Summary	Adjusted P Value
			Notch1-KD	static		low strain		high strain			WT - Notch1-KD
			1	710760	7.1076	405325	4.05325	257295	2.57295		static	0.7491	-0.8681 to 2.366	No	ns	0.5717
			2	622410	6.2241	328756	3.28756	438075	4.38075		low strain	2.558	0.9405 to 4.175	Yes	**	0.0014
			3	631057	6.31057	381921	3.81921	358689	3.58689		high strain	1.629	0.01222 to 3.247	Yes	*	0.0479
			4	825438	8.25438	438155	4.38155	320783	3.20783
			5	767457	7.67457	528582	5.28582	238483	2.38483
											Test details	Mean 1	Mean 2	Mean Diff.	SE of diff.	N1	N2	t	DF
					7.11424		4.16548		3.22665
											WT - Notch1-KD
											static	7.863	7.114	0.7491	0.6302	5	5	1.189	24
											low strain	6.723	4.165	2.558	0.6302	5	5	4.058	24
											high strain	4.856	3.227	1.629	0.6302	5	5	2.585	24
