# Supplementary material for: Aorta smooth muscle-on-a-chip reveals impaired mitochondrial dynamics as a therapeutic target for aortic aneurysm in bicuspid aortic valve disease
Source: eLife journal article supplement (doi:10.7554/elife.69310), 2021-09-06
Supplement: supp [file Figure 5-source data 3.xlsx]

## Sheet: data
	WT	static		low strain		high strain			statistics
	1	2557	0.2557	77342	7.7342	130564	13.0564		Compare each cell mean with the other cell mean in that row
	2	2390	0.239	46463	4.6463	56572	5.6572
	3	3029	0.3029	21046	2.1046	91147	9.1147		Number of families	1
	4			19426	1.9426	103964	10.3964		Number of comparisons per family	3
	5			76938	7.6938	117944	11.7944		Alpha	0.05
				24545	2.4545	84679	8.4679
				26867	2.6867				Sidak's multiple comparisons test	Predicted (LS) mean diff.	95.00% CI of diff.	Significant?	Summary
				52147	5.2147
									WT - NOTCH1-KD
									Static	-0.01363	-5.796 to 5.769	No	ns
									Low strain	-4.74	-8.405 to -1.074	Yes	**
	Notch1-KD	static		low strain		high strain			High strain	-4.656	-8.481 to -0.8309	Yes	*
	1			45763	4.5763	178890	17.889
	2	2503	0.2503	76350	7.635	81362	8.1362
	3	2698	0.2698	119161	11.9161	149787	14.9787		Test details	Predicted (LS) mean 1	Predicted (LS) mean 2	Predicted (LS) mean diff.	SE of diff.	N1	N2	t	DF
	4	3184	0.3184	67527	6.7527	70446	7.0446
	5			75404	7.5404	121505	12.1505		WT - NOTCH1-KD
				109313	10.9313	116356	11.6356		Static	0.2659	0.2795	-0.01363	2.282	3	3	0.005973	29
				96200	9.62	212931	21.2931		Low strain	3.685	8.425	-4.74	1.447	8	7	3.276	29
						181010	18.101		High strain	9.748	14.4	-4.656	1.51	6	8	3.084	29
