# Supplementary material for: Aorta smooth muscle-on-a-chip reveals impaired mitochondrial dynamics as a therapeutic target for aortic aneurysm in bicuspid aortic valve disease
Source: eLife journal article supplement (doi:10.7554/elife.69310), 2021-09-06
Supplement: supp [file Figure 5-source data 4.xls]

## Sheet: data
		um
		50	50000	8956.59	8911.22	8933.9
		10	10000	4946.26	5042.69	4994.48
		5	5000	3749.4	3885.54	3817.47
		1	1000	2382.38	2467.46	2424.92
		0.5	500	2178.17	2121.45	2149.81
		0.1	100	1917.24	1922.92	1920.08
		0.05	50	1996.66	1996.66	1996.66
		0.01	10	1781.11	1775.44	1778.27
		0.025	25	1922.92	1809.47	1866.19
		0	0	1707.37	1656.32	1681.84
	WT static	4553.2	4029.68	4496.48	4195.85	4252.57	4286.6				statistics
	um	8.13796	6.51864	7.96251	7.03262	7.20807	7.31334		7.36219		Compare each cell mean with the other cell mean in that row
		1.35633	1.08644	1.32708	1.1721	1.20134	1.21889		1.22703
	WT low strain	5746.06	5598.58	5672.32	5592.91	5349	4747.73				Number of families	1
		11.8276	11.3714	11.5995	11.3539	10.5994	8.73966		10.9152		Number of comparisons per family	3
		1.97127	1.89524	1.93325	1.89231	1.76657	1.45661		1.81921		Alpha	0.05
	WT high strain	5343.33	5929.25	5878.19	5827.15	5042.69	5793.11
		10.5819	12.3942	12.2363	12.0784	9.652	11.9731		11.486		Sidak's multiple comparisons test	Predicted (LS) mean diff.	95.00% CI of diff.	Significant?	Summary
		1.76365	2.0657	2.03938	2.01307	1.60867	1.99552		1.91433
	NOTCH1-KD static	4194.58	4254.24	4388.91	4333.65	4047.73	4129.45				WT - Notch1-kd
		7.0287	7.21324	7.62978	7.45887	6.57449	6.82725		7.12205		static	0.04002	-0.1757 to 0.2557	No	ns
		1.17145	1.20221	1.27163	1.24315	1.09575	1.13787		1.18701		low strain	0.3293	0.1030 to 0.5555	Yes	**
	NOTCH1-KD low strain	4787.44	4492.48	4861.18	4673.99	5246.9	3828.82				high strain	0.3797	0.1156 to 0.6439	Yes	**
		8.86247	7.95013	9.09056	8.51157	10.2836	5.89736		8.43262
		1.47708	1.32502	1.51509	1.4186	1.71394	0.982893		1.40544
	NOTCH1-KD high strain	5201.52	N/A	4588.91	N/A	4906.56	N/A				Test details	Predicted (LS) mean 1	Predicted (LS) mean 2	Predicted (LS) mean diff.	SE of diff.	N1	N2	t	DF
		10.1433		8.2484		9.23092			9.20753
		1.69054		1.37473		1.53849			1.53459		WT - Notch1-kd
											static	1.227	1.187	0.04002	0.08454	6	6	0.4734	26
											low strain	1.819	1.49	0.3293	0.08866	6	5	3.714	26
											high strain	1.914	1.535	0.3797	0.1035	6	3	3.668	26
