# Supplementary figures and images for: Aorta smooth muscle-on-a-chip reveals impaired mitochondrial dynamics as a therapeutic target for aortic aneurysm in bicuspid aortic valve disease
Source: eLife journal article supplement (doi:10.7554/elife.69310), 2021-09-06

**Fig. 6b (CRL1999 cell line)**

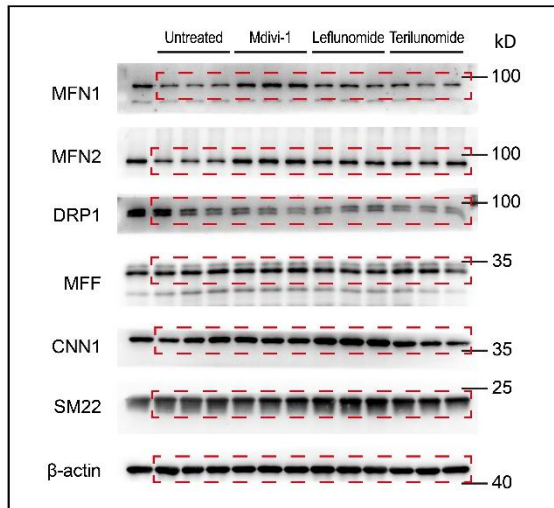

**Fig. 6c (pHAoSMC)**

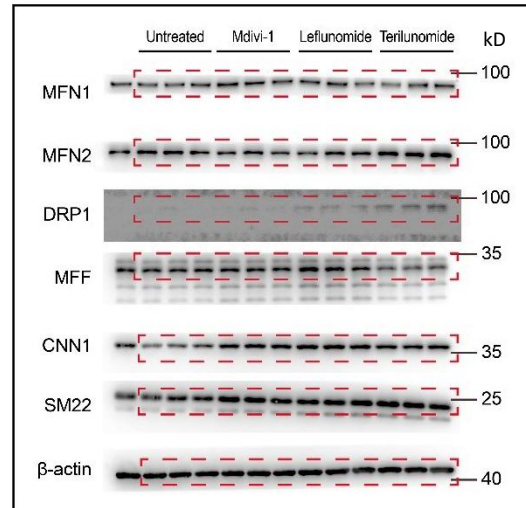

**Fig. 6d (ATCC-pHAoSMC)**

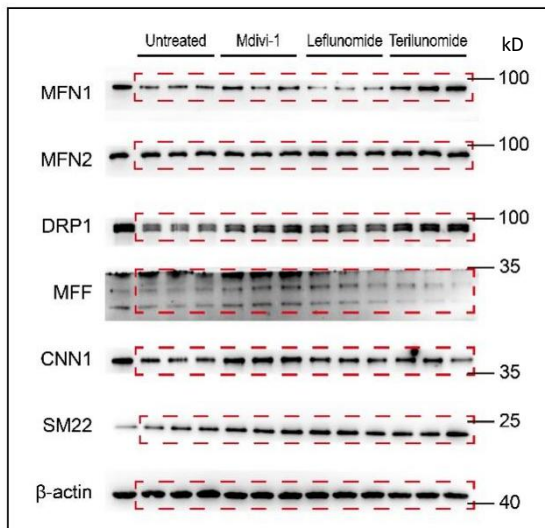

**Fig. 6e (B1-pHAoSMC)**

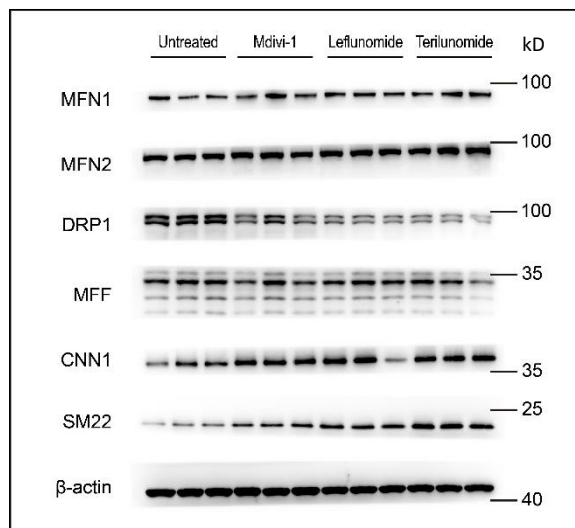

**Fig. 6f (B2-pHAoSMC)**

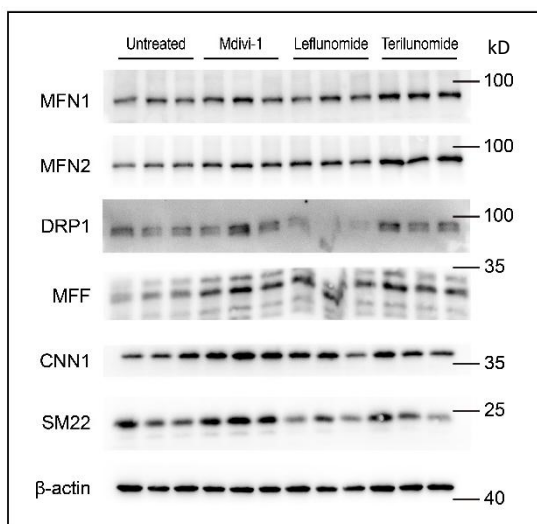

**Fig. 6g (B3-pHAoSMC)**

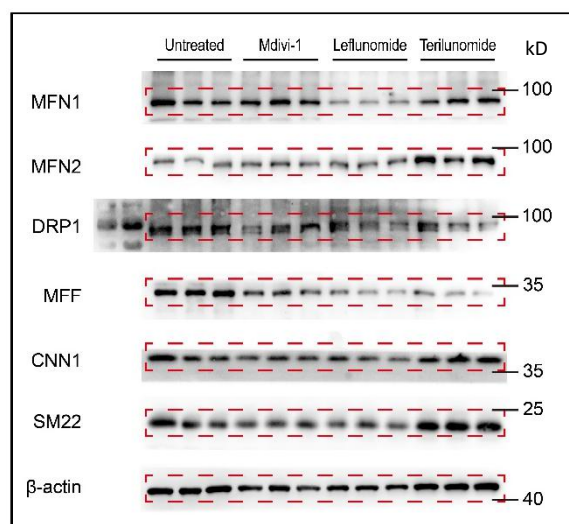

Supplement: supp [file elife-69310-supp-v1.zip]

CNN1

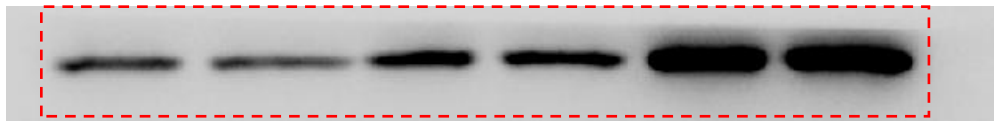

OPN

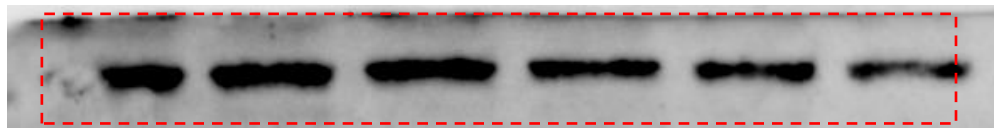

SM22

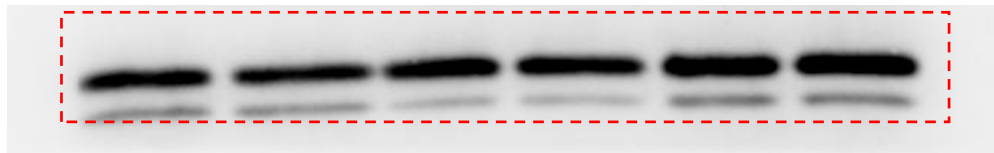

SM22

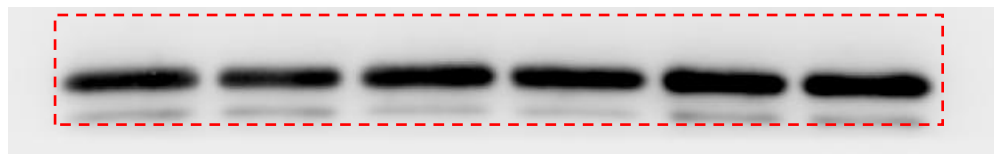

$\beta$ -actin

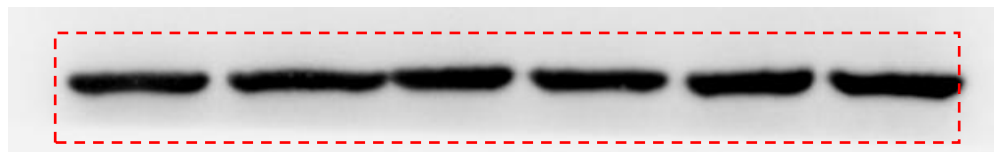

CNN1

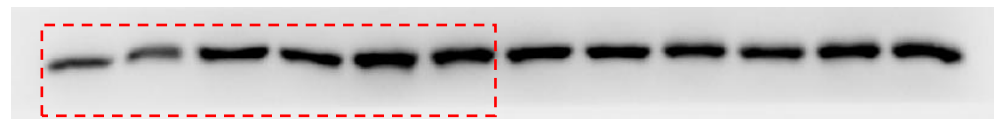

OPN

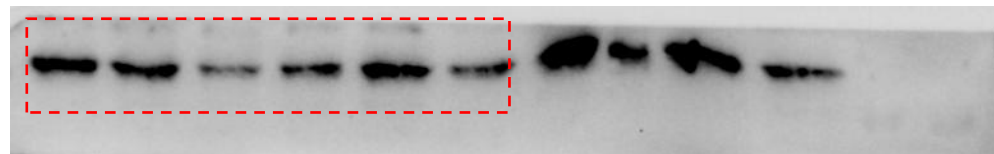

$\beta$ -actin

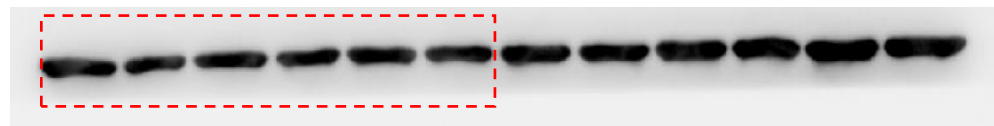

Supplement: supp [file elife-69310-supp-v1.zip]

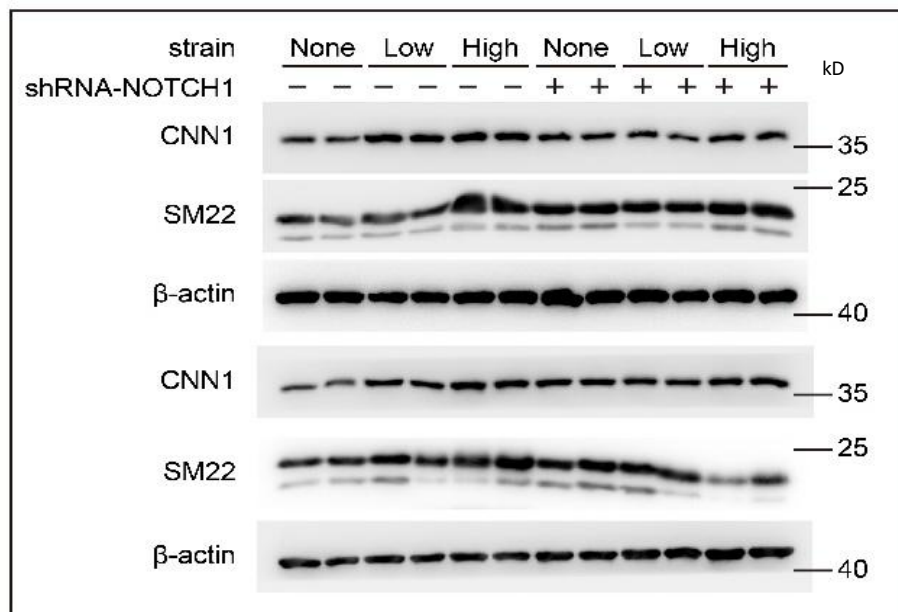

Supplement: supp [file elife-69310-supp-v1.zip]

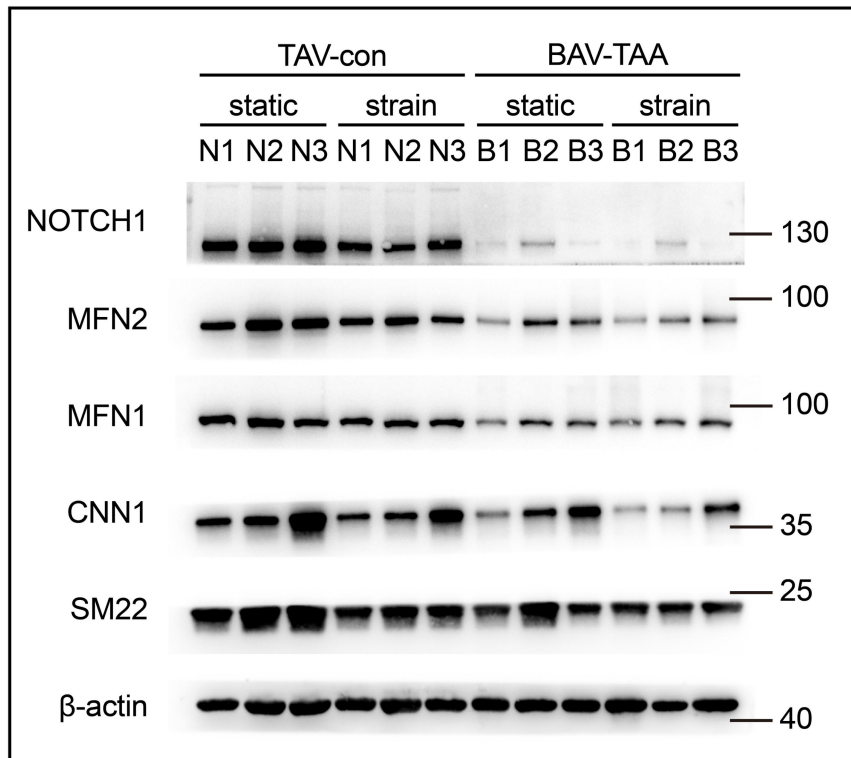

Supplement: supp [file elife-69310-supp-v1.zip]

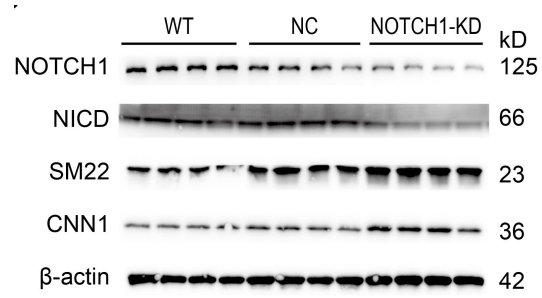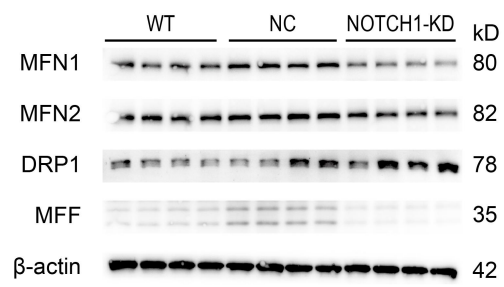

Supplement: supp [file elife-69310-supp-v1.zip]

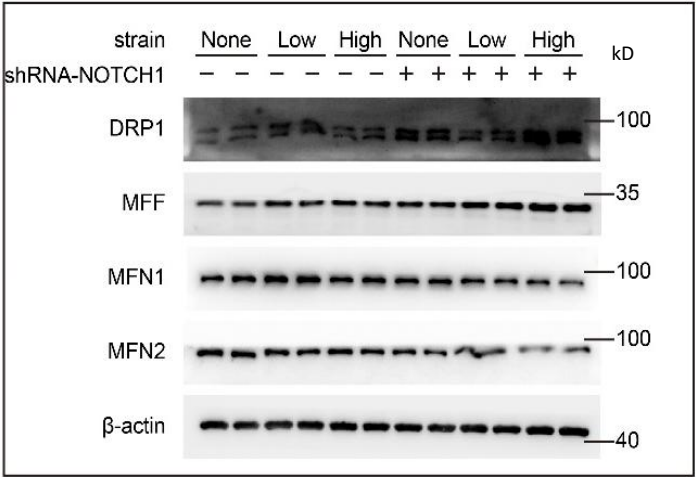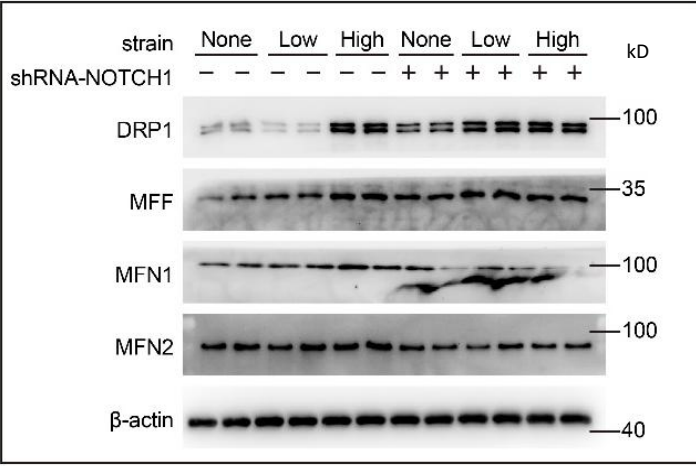

Supplement: supp [file elife-69310-supp-v1.zip]
